# Supplementary material for: How much GK is in the NKLM? A comparison between the catalogues of exam-relevant topics (GK) and the German National Competence-based Learning Objectives Catalogue for Undergraduate Medical Education (NKLM)
Source: PubMed Central journal article supplement (PMC5327656; doi:10.3205/zma001086), 2017-02-15
Supplement: JME-34-9-s-001.pdf [file JME-34-9-s-001.pdf]

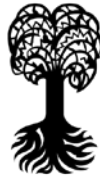

---

# NKLM und Gegenstands- Kataloge GK-1 und GK-2 im Vergleich

**Stand: 18.7.2016**

Olaf Fritze, Maria Lammerding-Köppel

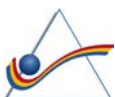

## **Impressum**

### **Autoren:**

Olaf Fritze,  
Maria Lammerding-Köppel

### **Herausgeber:**

Dr. med. M. Lammerding-Köppel, MME  
Kompetenzzentrum für Hochschuldidaktik in Medizin Baden-Württemberg

### **Kontakt:**

Kompetenzzentrum für Hochschuldidaktik in Medizin Baden-Württemberg  
Medizinische Fakultät der Eberhard Karls Universität Tübingen  
Elfriede-Aulhorn-Str. 10  
D-72076 Tübingen  
Tel.: +49 (0)7071-29 77 974 / -60  
Fax: +49 (0)7071-29 52 18  
E-Mail: [medizindidaktik@med.uni-tuebingen.de](mailto:medizindidaktik@med.uni-tuebingen.de)

**18.7.2016**

## **INHALTSVERZEICHNIS**

**Seite**

|                                                           |           |
|-----------------------------------------------------------|-----------|
| <b>1. METHODIK</b>                                        | <b>4</b>  |
| 1.1. Basis der Datenerhebung                              | 4         |
| 1.2. Vorgehen                                             | 4         |
| <b>2. PROZENTUALE ABDECKUNG DER GK-INHALTE IM NKLM</b>    | <b>5</b>  |
| <b>3. NKLM IM VERGLEICH ZUM GK-1</b>                      | <b>6</b>  |
| 3.1. Biologie für Mediziner                               | 7         |
| 3.2. Chemie für Mediziner und Biochemie/Molekularbiologie | 7         |
| 3.3. Physik für Mediziner                                 | 14        |
| 3.4. Anatomie                                             | 15        |
| 3.5. Physiologie                                          | 23        |
| 3.6. Medizinische Psychologie und Medizinische Soziologie | 29        |
| <b>4. NKLM IM VERGLEICH ZUM GK-2</b>                      | <b>31</b> |
| 4.1. GK-2 Teil 1: Gesundheitsstörungen                    | 32        |
| 4.2. GK-2 Teil 2: Krankheitsbilder                        | 38        |

# 1. Methodik

## 1.1. Basis der Datenerhebung

IMPP-Gegenstandskatalog (IMPP-GK-1):

- Teilkatalog „Biologie für Mediziner“ Auflage von Januar 2014
- Teilkatalog „Chemie für Mediziner und Biochemie/Molekularbiologie“ Auflage von Januar 2014
- Teilkatalog „Physik für Mediziner“ Auflage von Mai 2014
- Teilkatalog „Anatomie“ Auflage von Januar 2014
- Teilkatalog „Physiologie“ Auflage von Januar 2014
- Teilkatalog „Grundlagen der Medizinischen Psychologie und der Medizinischen Soziologie“ 2. Auflage von März 2010

IMPP-Gegenstandskatalog (IMPP-GK-2) 4. Auflage von Dezember 2013

## 1.2. Vorgehen

2 Studierende der Humanmedizin (10. Fachsemester) suchten zunächst unabhängig voneinander nach inhaltlichen Übereinstimmungen (Stichwortrecherche, Augenscheinprüfung durch gezielte Sichtung von Kapiteln mit vermuteten inhaltlichen Kongruenzen). In einer Excel-Tabelle wurden jedem GK-Begriff die zugehörigen Identifikationsnummern (ID) für NKLM-Teilkompetenzen oder NKLM-Lernziele zugeordnet. Bei deutlichen Unterschieden in der Terminologie wurden die Synonyme dokumentiert. Wurden zu einem GK-Begriff keine NKLM-Entsprechungen gefunden, so wurde das leere NKLM-Feld farblich hervorgehoben.

Beide Ergebnisse wurden verglichen, bei Unterschieden oder Unsicherheiten diskutiert und konsentiert. Ein dritter Studierender (8. Fachsemester) prüfte die Ergebnisse im Nachgang stichprobenartig auf Plausibilität. Eine zusätzliche Prüfung auf Richtigkeit und Vollständigkeit wurde durch den Abgleich mit weiteren Quellen realisiert:

- (1) mit einem unabhängigen Expertenrating zu GK-2 Teil 2 und NKLM-Kapitel 21,
- (2) mit den in den NKLM-Kapiteln 12, 13 und 15 angegebenen IMPP-Querverweisen.

Nicht von den Studierenden identifizierte Fundstellen wurden ergänzt.

Dieses Skript soll auch weiterhin vervollständigt werden, die aktuellste Version steht als Download unter [www.merlin-bw.de/gk-nkml-abgleich.html](http://www.merlin-bw.de/gk-nkml-abgleich.html) zur Verfügung.

Bei vielen NKLM-Fundstellen wurden die entsprechenden ID zugunsten einer besseren Übersichtlichkeit in 3 Spalten aufgeteilt.

Die Verfasser geben keine Garantie für Vollständigkeit und Richtigkeit der Vergleichsergebnisse.

## 2. Prozentuale Abdeckung der GK-Inhalte im NKLM

In der nachfolgenden Tabelle ist zum Überblick dargestellt, wie viele Themen die einzelnen Gegenstandskataloge beinhalteten, wie viele dieser Inhalte im NKLM wieder gefunden wurden und welcher prozentualen Abdeckung dies entspricht:

| Gegenstandskatalog | Anzahl der GK-Begriffe | NKLM-Treffer | Abdeckung |
|--------------------|------------------------|--------------|-----------|
| GK-1 Anatomie      | 409                    | 387          | 95%       |
| GK-1 Chem&Biochem  | 371                    | 363          | 98%       |
| GK-1 Physiologie   | 347                    | 334          | 96%       |
| GK-1 Physik        | 48                     | 47           | 98%       |
| GK-1 Biologie      | 34                     | 32           | 94%       |
| GK-1 Psycho-Sozio  | 63                     | 62           | 98%       |
| GK-2 Teil1         | 354                    | 311          | 88%       |
| GK-2 Teil2         | 715                    | 604          | 84%       |
| <b>Gesamt</b>      | 1561                   | 1390         | 93%       |

### **3. NKLM im Vergleich zum GK-1**

### 3.1. Biologie für Mediziner

| GK Biologie |                                                               | Abgleich mit NKLM   |                         |                                |
|-------------|---------------------------------------------------------------|---------------------|-------------------------|--------------------------------|
| <b>1</b>    | <b>Allgemeine Zellbiologie, Zellteilung und Zelltod</b>       |                     |                         |                                |
| 1.1         | Zellbegriff und zelluläre Strukturelemente                    | 12.3.1              | 12.3                    |                                |
| 1.2         | Zellmembran                                                   | 12.3.1,<br>12.3.1.4 | 12.3.1.2,<br>12.3.1.4   | 12.3.2.1,<br>12.3              |
| 1.3         | Zellkern                                                      | 12.3.1,<br>12.3.1.4 | 12.2.5,<br>12.3.1.3     | 12.2.5.5,<br>12.3,<br>12.3.1.1 |
| 1.4         | Zytoplasma, Zytosol                                           | 12.3.1,<br>12.3.1.4 | 12.2.5.5.7,<br>12.3.1.3 | 12.3,<br>12.3.1.1              |
| 1.5         | Ribosomen                                                     | 12.3.1,<br>12.3.1.4 | 12.2.5.7,<br>12.3.1.3   | 12.3,<br>12.3.1.1              |
| 1.6         | Endoplasmatisches Retikulum                                   | 12.3.1,<br>12.3.1.4 | 12.3,<br>12.3.1.3       | 12.3.1.1                       |
| 1.7         | Golgi-Komplex (Golgi-Apparat)                                 | 12.3.1,<br>12.3.1.4 | 12.3,<br>12.3.1.3       | 12.3.1.1                       |
| 1.8         | Lysosomen                                                     | 12.3.1,<br>12.3.1.4 | 12.3,<br>12.3.1.3       | 12.3.1.1                       |
| 1.9         | Stoffabgabe                                                   | 12.3.1,<br>12.3.1.4 | 12.3,<br>12.3.1.3       | 12.3.1.1                       |
| 1.10        | Stoffaufnahme                                                 | 12.3.1,<br>12.3.1.4 | 12.3,<br>12.3.1.3       | 12.3.1.1                       |
| 1.11        | Peroxisomen                                                   | 12.3.1,<br>12.3.1.4 | 12.3,<br>12.3.1.3       | 12.3.1.1                       |
| 1.12        | Mitochondrien                                                 | 12.3.1,<br>12.3.1.4 | 12.3,<br>12.3.1.3       | 12.3.1.1                       |
| 1.13        | Zytoskelett                                                   | 12.3.1,<br>12.3.1.4 | 12.3,<br>12.3.1.3       | 12.3.1.1                       |
| 1.14        | Zellzyklus und Zellteilung (Mitose)                           | 12.3.3              | 12.2.5.5                | 12.2.5.6                       |
| 1.15        | Meiose (Reifeteilung)                                         | 12.3.3,<br>12.3.3.2 | 12.2.5.5                | 12.2.5.6                       |
| 1.16        | Zelltod                                                       | 12.3.5              |                         |                                |
| 1.17        | Zellkommunikation und Signaltransduktion                      | 12.3.5              |                         |                                |
| <b>2</b>    | <b>Genetik/Grundlagen der Humangenetik</b>                    |                     |                         |                                |
| 2.1         | Organisation und Funktion eukaryontischer Gene                | 12.2.5              | 12.2.5.5                |                                |
| 2.2         | Chromosomen des Menschen                                      | 12.2.5              | 12.2.5.5                |                                |
| 2.3         | Formale Genetik                                               | 12.2.5              | 12.2.5.5                |                                |
| 2.4         | Gonosomen, Geschlechtsbestimmung und -differenzierung         | 12.2.5              | 12.2.5.5                | 12.7.1.1                       |
| 2.5         | Mutationen                                                    | 12.2.5              | 12.2.5.5                |                                |
| 2.6         | Klonierung und Nachweis von Genen bzw. Genmutationen          | 12.2.5              |                         |                                |
| 2.7         | Entwicklungsgenetik                                           | x                   |                         |                                |
| 2.8         | Populationsgenetik                                            | x                   |                         |                                |
| 2.9         | Genetische Evolution                                          | 12.2.5              |                         |                                |
| <b>3</b>    | <b>Grundlagen der Mikrobiologie und Ökologie</b>              |                     |                         |                                |
| 3.1         | Grundlagen der mikrobiologischen Ökologie und der Infektionen | 13.2.6              |                         |                                |
| 3.2         | Morphologische Grundformen der Bakterien                      | 13.2.6              |                         |                                |
| 3.3         | Aufbau und Morphologie der Bakterienzelle (Procyte)           | 13.2.6              |                         |                                |
| 3.4         | Stoffwechsel und Vermehrung der Bakterien                     | 13.2.6              |                         |                                |
| 3.5         | Bakteriengenetik                                              | 13.2.6              |                         |                                |
| 3.6         | Pilze                                                         | 13.2.6              |                         |                                |
| 3.7         | Viren                                                         | 13.2.6              |                         |                                |
| 3.8         | Prionen                                                       | 21.1.10.40          |                         |                                |

### 3.2. Chemie für Mediziner und Biochemie/Molekularbiologie

| GK Chem. & Biochem. & Molbio.                                            |                                                                 | Synonym                                                                               | Abgleich mit NKLM                  |                        |                                     |
|--------------------------------------------------------------------------|-----------------------------------------------------------------|---------------------------------------------------------------------------------------|------------------------------------|------------------------|-------------------------------------|
| <b>1 Aufbau der Materie</b>                                              |                                                                 |                                                                                       |                                    |                        |                                     |
| 1.1                                                                      | Atome, chemische Elemente                                       |                                                                                       | 12.2.1.9                           | 12.2.2.1               | 12.2.2.2,<br>12.2.2.3               |
| 1.1.1                                                                    | Begriffe                                                        |                                                                                       | 12.2.2                             |                        |                                     |
| 1.1.2                                                                    | Atomkern (s. a. GK Physik 3.1)                                  | Aufbau Elemente/ Materie                                                              | 12.2.2                             |                        |                                     |
| 1.1.3                                                                    | Radioaktivität(s. a. GK Physik Kap. 8)                          |                                                                                       | 12.2.1                             |                        |                                     |
| 1.1.4                                                                    | Elektronenhülle                                                 | Aufbau Elemente/ Materie                                                              | 12.2.2                             |                        |                                     |
| 1.1.5                                                                    | Periodensystem                                                  | periodisch; Funktion von Elektrolyten und Spurenelementen                             | 12.2.2                             | 12.2.3.7               |                                     |
| <b>1.2 Moleküle, chemische Bindungen</b>                                 |                                                                 |                                                                                       | 12.2.2.1                           | 12.4.2.6               | 12.12.2.1                           |
| 1.2.1                                                                    | Ionenbindung                                                    | Materie aus Moleküler                                                                 | 12.2.2                             |                        |                                     |
| 1.2.2                                                                    | Atombindung                                                     |                                                                                       | 12.2.2                             |                        |                                     |
| 1.2.3                                                                    | Polarität von Molekülen                                         | Aufbau, periodische Eigenschaften und Stabilität der Elemente                         | 12.2.2.1                           |                        |                                     |
| 1.2.4                                                                    | schwache Wechselwirkungen                                       |                                                                                       | 12.2.2                             |                        |                                     |
| 1.2.5                                                                    | Metallkomplexe                                                  |                                                                                       | 12.2.2                             |                        |                                     |
| 1.2.6                                                                    | metallische Bindung                                             | Aufbau, periodische Eigenschaften und Stabilität der Elemente                         | 12.2.2.1                           |                        |                                     |
| 1.2.7                                                                    | Bindungstypen in biochemisch relevanten Verbindungen            | chemische Struktur                                                                    | 12.2.2                             |                        |                                     |
| <b>1.3 Heterogene Stoffgemische</b>                                      |                                                                 | Eigenschaften von Gasen                                                               | 12.2.1.7                           | 12.2.2.2               | 12.2.2.4,<br>12.4.2.6               |
| 1.3.1                                                                    | Aggregatzustände (s. a. GK Physik 4.4 und 4.6)                  | Phasengleichgewichte                                                                  | 12.2.2                             |                        |                                     |
| 1.3.2                                                                    | Begriffe                                                        | stoffliche Eigenschaften der Materie unkl. Phasen, -gleichgewichte und Gleichgewichte | 12.2.2.2                           |                        |                                     |
| 1.3.3                                                                    | heterogene Gleichgewichte (s. a. GK Physik 4.6)                 | Aufbau, Eigenschaften und Funktion von biologischen Membranen                         | 12.2.2,<br>12.14.2.8,<br>12.16.3.3 | 12.3.1.2,<br>12.16.3.1 | 12.3.2.1,<br>12.3.1.2,<br>12.16.3.2 |
| 1.3.4                                                                    | Trennverfahren                                                  |                                                                                       | 12.2.2                             |                        |                                     |
| <b>2 Chemisch-analytische Verfahren in der Biochemie und Medizin</b>     |                                                                 |                                                                                       |                                    |                        |                                     |
| 2.1                                                                      | Elektromagnetische Strahlung (s. a. GK Physik 6.4)              | Bedeutung von Schwingungen und Wellen in der Medizin                                  | 12.2.2,<br>12.2.1.4                | 12.2.2.3               |                                     |
| 2.2                                                                      | Begriffe (s.a. GK Physik 7.4)                                   |                                                                                       | x                                  |                        |                                     |
| 2.3                                                                      | NMR-Spektroskopie (s. a. GK Physik 5.9)                         |                                                                                       | x                                  |                        |                                     |
| 2.4                                                                      | Infrarotspektroskopie                                           |                                                                                       | x                                  |                        |                                     |
| 2.5                                                                      | UV/VIS-Spektroskopie (s.a. GK Physik 7.4)                       |                                                                                       | x                                  |                        |                                     |
| 2.6                                                                      | Massenspektrometrie                                             |                                                                                       | x                                  |                        |                                     |
| <b>3 Chemische Reaktionen</b>                                            |                                                                 |                                                                                       |                                    |                        |                                     |
| 3.1                                                                      | Chemische Gleichungen                                           |                                                                                       | 12.2.2.5                           |                        |                                     |
| 3.1.1                                                                    | Begriffe, Definitionen                                          |                                                                                       | 12.2.2                             |                        |                                     |
| 3.1.2                                                                    | Stöchiometrie                                                   |                                                                                       | 12.2.2                             |                        |                                     |
| 3.2                                                                      | Thermodynamische Grundlagen                                     |                                                                                       | 12.2.1.1                           | 12.2.2.2               | 12.2.2.5                            |
| 3.2.1                                                                    | Begriffe, Definitionen                                          |                                                                                       | 12.2.2                             |                        |                                     |
| 3.2.2                                                                    | Energetik chemischer Reaktionen                                 |                                                                                       | 12.2.2                             |                        |                                     |
| 3.2.3                                                                    | chemisches Gleichgewicht                                        |                                                                                       | 12.2.2                             |                        |                                     |
| 3.3                                                                      | Grundlagen der Kinetik                                          | Biokatalyse                                                                           | 12.2.4                             | 12.2.2.2               | 12.2.2.5                            |
| 3.3.1                                                                    | Begriffe, Definitionen                                          |                                                                                       | 12.2.2                             |                        |                                     |
| 3.3.2                                                                    | Energieprofil                                                   |                                                                                       | 12.2.2                             |                        |                                     |
| 3.3.3                                                                    | Katalyse                                                        |                                                                                       | 12.2.2                             |                        |                                     |
| 3.3.4                                                                    | Zeitgesetze                                                     |                                                                                       | 12.2.2                             |                        |                                     |
| 3.4                                                                      | Säure-Base-Reaktionen, Puffer (s. a. 21.1 und GK Physiol. 5.10) | Mechanismen der Regulation des zellulären pH-Wertes                                   | 12.3.2.4,<br>12.12.2.1             | 12.2.2.6,<br>12.14.3.5 | 12.4.2.6,<br>12.16.2.6              |
| 3.4.1                                                                    | Begriffe, Definitionen                                          |                                                                                       | 12.2.2                             | 12.2.2.6               |                                     |
| 3.4.2                                                                    | dissoziationsabhängige Größen                                   |                                                                                       | 12.2.2                             | 12.2.2.6               |                                     |
| 3.4.3                                                                    | Säure-Base-Reaktionen                                           |                                                                                       | 12.2.2                             | 12.2.2.6               |                                     |
| 3.4.4                                                                    | Puffersysteme                                                   |                                                                                       | 12.2.2                             | 12.2.2.6               |                                     |
| 3.4.5                                                                    | Beispiele                                                       |                                                                                       | 12.2.2                             | 12.2.2.6               |                                     |
| 3.5                                                                      | Redox-Reaktionen                                                |                                                                                       | 12.6.1.7,<br>12.12.2.4             | 12.2.2.6               | 12.6.1.8,<br>12.6.2.1               |
| 3.5.1                                                                    | Begriffe, Definitionen                                          |                                                                                       | 12.2.2                             | 12.2.2.6               |                                     |
| 3.5.2                                                                    | Redox-Gleichungen                                               |                                                                                       | 12.2.2                             | 12.2.2.6               |                                     |
| 3.5.3                                                                    | elektrochemische Zellen                                         |                                                                                       | 12.2.2                             | 12.2.2.6               |                                     |
| 3.5.4                                                                    | Beispiele                                                       |                                                                                       | 12.2.2                             | 12.2.2.6               |                                     |
| 3.6                                                                      | Reaktionen von Salzen                                           |                                                                                       | 12.2.2.6                           |                        |                                     |
| 3.6.1                                                                    | Salzlösungen                                                    |                                                                                       | 12.2.2                             | 12.2.2.6               |                                     |
| 3.6.2                                                                    | Beispiele                                                       |                                                                                       | 12.2.2                             | 12.2.2.6               |                                     |
| 3.7                                                                      | Reaktionen von Metallkomplexen                                  |                                                                                       | 12.2.2.6                           | 12.6.1.8               | 12.12.2.1                           |
| 3.7.1                                                                    | Eigenschaften                                                   |                                                                                       | 12.2.2                             |                        |                                     |
| 3.7.2                                                                    | typische Reaktionen                                             |                                                                                       | 12.2.2                             |                        |                                     |
| <b>4 Reaktionen einfacher und substituierter Kohlenstoffverbindungen</b> |                                                                 |                                                                                       |                                    |                        |                                     |
| 4.1                                                                      | Bindungsverhältnisse                                            | chem. Struktur und Reaktionen biochem. Funktioneller Gruppen                          | 12.2.2.7                           |                        |                                     |
| 4.2                                                                      | Reaktionstypen                                                  |                                                                                       | 12.2.2.7                           |                        |                                     |



|            |                                                                                |                                                                                                                                 |                    |                     |                     |
|------------|--------------------------------------------------------------------------------|---------------------------------------------------------------------------------------------------------------------------------|--------------------|---------------------|---------------------|
| <b>5</b>   | <b>Grundstrukturen</b>                                                         | funktionelle Gruppen und monomere Bausteine komplexer Biomoleküle                                                               | 12.2.3.1           | 12.2.2.7            |                     |
| 5.1        | Offenkettige Kohlenwasserstoffe                                                | biochem                                                                                                                         | 12.2.2             | 12.2.2.7            |                     |
| 5.2        | Alicyclische Verbindungen                                                      | biochem                                                                                                                         | 12.2.2             | 12.2.2.7            |                     |
| 5.3        | Aromaten                                                                       | biochem                                                                                                                         | 12.2.2             | 12.2.2.7            |                     |
| 5.4        | Heterocyclen                                                                   | biochem                                                                                                                         | 12.2.2             | 12.2.2.7            |                     |
| <b>6</b>   | <b>Funktionelle Gruppen</b>                                                    | funktionelle Gruppen und monomere Bausteine komplexer Biomoleküle                                                               | 12.2.3.1           | 12.2.2.7            |                     |
| 6.1        | Alkohole, Phenole, Chinone, Ether                                              | biochem                                                                                                                         | 12.2.2             | 12.2.2.7            |                     |
| 6.2        | Verbindungen mit N                                                             | biochem                                                                                                                         | 12.2.2             | 12.2.2.7            |                     |
| 6.3        | Verbindungen mit S                                                             | biochem                                                                                                                         | 12.2.2             | 12.2.2.7            |                     |
| 6.4        | Aldehyde und Ketone                                                            | biochem                                                                                                                         | 12.2.2             | 12.2.2.7            |                     |
| 6.5        | Carbonsäuren, Carbonsäurederivate                                              | biochem                                                                                                                         | 12.2.2             | 12.2.2.7            |                     |
| 6.6        | Hydroxy- und Oxocarbonsäuren                                                   | biochem                                                                                                                         | 12.2.2             | 12.2.2.7            |                     |
| 6.7        | „Anorganische“ Säuren und ihre Derivate                                        | biochem                                                                                                                         | 12.2.2             | 12.2.2.7            |                     |
| <b>7</b>   | <b>Stereochemie</b>                                                            |                                                                                                                                 | 12.2.2.7           | 12.2.2.8            |                     |
| 7.1        | Isomerien                                                                      |                                                                                                                                 | 12.2.2.7           |                     |                     |
| 7.1.1      | Begriffe, Definitionen                                                         | chem. Struktur und Reaktionen biochem. Funktioneller Gruppen erklären; Bedeutung der räumlichen Anordnung funktioneller Gruppen | 12.2.2.7           | 12.2.2.8            |                     |
| 7.1.2      | Anwendungen                                                                    |                                                                                                                                 | 12.2.2.7           | 12.2.2.8            |                     |
| 7.2        | Enantiomere                                                                    |                                                                                                                                 |                    | 12.2.2.7            |                     |
| 7.2.1      | Eigenschaften                                                                  | chem. Struktur und Reaktionen biochem. Funktioneller Gruppen; Bedeutung der räumlichen Anordnung funktioneller Gruppen          | 12.2.2.7           | 12.2.2.8            |                     |
| 7.2.2      | Nomenklatur                                                                    |                                                                                                                                 | 12.2.2.7           | 12.2.2.8            |                     |
| 7.2.3      | Anwendungen                                                                    |                                                                                                                                 | 12.2.2.7           | 12.2.2.8            |                     |
| <b>8</b>   | <b>Medizinisch relevante Werkstoffe/Biomaterialien</b>                         |                                                                                                                                 | 12.2.2.7           |                     |                     |
| 8.1        | Metalle                                                                        |                                                                                                                                 | 12.2.2             | 12.2.2.7            |                     |
| 8.2        | Keramische Materialien                                                         |                                                                                                                                 | 12.2.2             | 12.2.2.7            |                     |
| 8.3        | Polymere                                                                       |                                                                                                                                 | 12.2.2             | 12.2.2.7            |                     |
| 8.4        | Anwendungen                                                                    |                                                                                                                                 | 12.2.2             | 12.2.2.7            |                     |
| <b>9</b>   | <b>Struktur und Eigenschaften von Aminosäuren, Peptiden und Proteinen</b>      |                                                                                                                                 | 12.2.2.7, 12.6.2.4 | 12.2.3.1, 12.10.3.6 | 12.2.3.3, 12.15.3.4 |
| 9.1        | Aminosäuren                                                                    |                                                                                                                                 | 12.2.2.7           | 12.2.3.1            |                     |
| 9.1.1      | Klassifizierung, Struktur                                                      |                                                                                                                                 | 12.2.3             | 12.2.2.7            | 12.2.3.1            |
| 9.1.2      | Eigenschaften                                                                  |                                                                                                                                 | 12.2.3             | 12.2.2.7            | 12.2.3.1            |
| 9.1.3      | Reaktionen                                                                     |                                                                                                                                 | 12.2.3             | 12.2.2.7            | 12.2.3.1            |
| 9.2        | Peptide und Proteine                                                           | Struktur und Funktionsweise von Enzymen                                                                                         | 12.2.4.1           | 12.2.2.7            | 12.2.3.1            |
| 9.2.1      | Begriffe                                                                       |                                                                                                                                 | 12.2.3             | 12.2.2.7            | 12.2.3.1            |
| 9.2.2      | Peptidbindung                                                                  |                                                                                                                                 | 12.2.3             | 12.2.2.7            | 12.2.3.1            |
| 9.2.3      | Strukturen                                                                     |                                                                                                                                 | 12.2.3, 12.7.2.2   | 12.2.2.7            | 12.2.3.1            |
| 9.2.4      | Eigenschaften                                                                  |                                                                                                                                 | 12.2.3             | 12.2.2.7            | 12.2.3.1            |
| 9.2.5      | Proteinanalytik                                                                |                                                                                                                                 | 12.2.3             | 12.2.2.7            | 12.2.3.1            |
| <b>10</b>  | <b>Struktur und Eigenschaften von Kohlenhydraten</b>                           |                                                                                                                                 | 12.2.2.7, 12.6.2.2 | 12.2.3.1, 12.6.3.1  | 12.2.3.2, 13.3.15.1 |
| 10.1       | Monosaccharide                                                                 |                                                                                                                                 | 12.2.2.7           | 12.2.3.1            |                     |
| 10.1.1     | Klassifizierung, Struktur                                                      |                                                                                                                                 | 12.2.3             | 12.2.2.7            | 12.2.3.1            |
| 10.1.2     | Stereochemie                                                                   |                                                                                                                                 | 12.2.3             | 12.2.2.7            | 12.2.3.1            |
| 10.1.3     | Reaktionen                                                                     |                                                                                                                                 | 12.2.3             | 12.2.2.7            | 12.2.3.1            |
| 10.1.4     | Beispiele                                                                      |                                                                                                                                 | 12.2.3             | 12.2.2.7            | 12.2.3.1            |
| 10.2       | Disaccharide                                                                   |                                                                                                                                 | 12.2.2.7           | 12.2.3.1            |                     |
| 10.2.1     | Klassifizierung, Struktur                                                      |                                                                                                                                 | 12.2.3             | 12.2.2.7            | 12.2.3.1            |
| 10.2.2     | Eigenschaften                                                                  |                                                                                                                                 | 12.2.3             | 12.2.2.7            | 12.2.3.1            |
| 10.2.3     | Beispiele                                                                      |                                                                                                                                 | 12.2.3             | 12.2.2.7            | 12.2.3.1            |
| 10.3       | Oligo- und Polysaccharide                                                      |                                                                                                                                 | 12.2.2.7           | 12.2.3.1            |                     |
| 10.3.1     | Klassifizierung, Struktur                                                      |                                                                                                                                 | 12.2.3             | 12.2.2.7            | 12.2.3.1            |
| 10.3.2     | Beispiele                                                                      |                                                                                                                                 | 12.2.3             | 12.2.2.7            | 12.2.3.1            |
| <b>11</b>  | <b>Struktur und Eigenschaften von Lipiden</b>                                  |                                                                                                                                 | 12.2.2.7, 12.6.2.2 | 12.2.3.1, 12.6.3.1  | 12.2.3.4, 13.3.15.3 |
| 11.1       | Klassifizierung, Struktur und Eigenschaften                                    |                                                                                                                                 | 12.2.3             | 12.2.2.7            | 12.2.3.1            |
| 11.2       | Speicherlipide                                                                 |                                                                                                                                 | 12.2.2.7           | 12.2.3.1            |                     |
| 11.2.1     | Klassifizierung, Struktur                                                      |                                                                                                                                 | 12.2.3             | 12.2.2.7            | 12.2.3.1            |
| 11.2.2     | Eigenschaften, Reaktionen                                                      |                                                                                                                                 | 12.2.3             | 12.2.2.7            | 12.2.3.1            |
| 11.2.3     | Beispiele                                                                      |                                                                                                                                 | 12.2.3             | 12.2.2.7            | 12.2.3.1            |
| 11.3       | Membranlipide                                                                  |                                                                                                                                 | 12.2.2.7           | 12.2.3.1            |                     |
| 11.3.1     | Klassifizierung, Struktur                                                      |                                                                                                                                 | 12.2.3             | 12.2.2.7            | 12.2.3.1            |
| 11.3.2     | Eigenschaften, Reaktionen                                                      |                                                                                                                                 | 12.2.3             | 12.2.2.7            | 12.2.3.1            |
| <b>12</b>  | <b>Struktur und Eigenschaften von Nucleotiden und Derivaten, Nucleinsäuren</b> |                                                                                                                                 | 12.2.2.7, 12.6.2.5 | 12.2.3.1, 13.3.15.4 | 12.2.3.5, 12.6.1.9  |
| 12.1       | Nucleoside, Nucleotide und Nucleotidderivate                                   |                                                                                                                                 |                    |                     |                     |
| 12.1.1     | Klassifizierung, Struktur                                                      |                                                                                                                                 | 12.2.3             |                     |                     |
| 12.1.2     | Reaktionen                                                                     |                                                                                                                                 | 12.2.3             |                     |                     |
| 12.1.3     | Beispiele                                                                      |                                                                                                                                 | 12.2.3             |                     |                     |
| 12.2       | Nucleinsäuren                                                                  |                                                                                                                                 |                    |                     |                     |
| 12.2.1     | Klassifizierung, Struktur                                                      |                                                                                                                                 | 12.2.3             |                     |                     |
| 12.2.2     | Reaktionen                                                                     |                                                                                                                                 | 12.2.3             |                     |                     |
| <b>13.</b> | <b>Vitamine und Vitaminderivate</b>                                            |                                                                                                                                 | 12.2.3.6           |                     |                     |

|            |                                                                              |                                                              |                   |                    |                      |
|------------|------------------------------------------------------------------------------|--------------------------------------------------------------|-------------------|--------------------|----------------------|
| 13.1       | Definition und Klassifikation                                                |                                                              | 12.2.3            |                    |                      |
| 13.2       | Strukturprinzipien                                                           |                                                              | 12.2.3            |                    |                      |
| 13.3       | Herkunft, Stabilität                                                         |                                                              | 12.2.3            |                    |                      |
| 13.4       | Funktion                                                                     |                                                              | 12.2.3            |                    |                      |
| 13.5       | Stoffwechsel                                                                 |                                                              | 12.2.3            |                    |                      |
| <b>14</b>  | <b>Energetik und Kinetik biochemischer Reaktionen</b>                        |                                                              |                   |                    |                      |
| 14.1       | Fließgleichgewicht                                                           | Struktur und Funktionsweise von Enzymen                      | 12.2.2            | 12.2.4.1           |                      |
| 14.2       | Gekoppelte Reaktionen                                                        |                                                              | 12.2.2            | 12.2.4.1           |                      |
| 14.3       | „Energereiche“ Verbindungen                                                  |                                                              | 12.2.2            | 12.2.4.1           |                      |
| 14.4       | Biokatalyse                                                                  |                                                              | 12.2.4            | 12.2.4.1           |                      |
| 14.5       | Cofaktoren                                                                   | Struktur und Funktionsweise von Enzymen                      | 12.2.3            | 12.2.4.1           | 12.2.3.6, 12.6.1.7   |
| 14.6       | Enzymkinetik                                                                 |                                                              | 12.2.4            | 12.2.4.1           |                      |
| 14.7       | Hemmung von Enzymen                                                          |                                                              | 12.2.4            | 12.2.4.2           |                      |
| 14.8       | Abhängigkeit der Enzymaktivität                                              |                                                              | 12.2.4            | 12.2.4.1           |                      |
| <b>15</b>  | <b>Prinzipien der Enzymregulation</b>                                        |                                                              | 12.2.4.1          | 12.2.4.3           |                      |
| 15.1       | Abhängigkeit der Enzymaktivität von der Substratkonzentration                |                                                              | 12.2.4            |                    |                      |
| 15.2       | Negative Rückkopplung                                                        |                                                              | 12.2.4            |                    |                      |
| 15.3       | Allosterische Regulation                                                     |                                                              | 12.2.4            |                    |                      |
| 15.4       | Enzymgesteuerte chemische Modifikation von Enzymen                           |                                                              | 12.2.4            |                    |                      |
| 15.5       | Veränderung der Enzymkonzentration                                           |                                                              | 12.2.4            |                    |                      |
| 15.6       | Limitierte Proteolyse                                                        |                                                              | 12.2.4            |                    |                      |
| 15.7       | Protein-Protein-Interaktion                                                  |                                                              | 12.2.4            |                    |                      |
| 15.8       | Kontrollierte räumliche Trennung von Enzym und Substrat                      |                                                              | 12.2.4            |                    |                      |
| <b>16.</b> | <b>Kataboler Stoffwechsel und Energiegewinnung</b>                           |                                                              | 12.6.1, 13.3.15.4 | 12.6.1.7           | 13.3.15.1, 13.3.15.3 |
| 16.1       | Kohlenhydratabbau                                                            |                                                              | 12.6.1            | 12.6.1.1           | 12.6.2.1.            |
| 16.2       | Triacylglycerol-(Triglycerid-) und Fettsäureabbau                            |                                                              | 12.6.1            | 12.6.1.2           |                      |
| 16.3       | Ketonkörpersynthese und -abbau                                               |                                                              | 12.6.1            | 12.6.1.3           |                      |
| 16.4       | Aminosäureabbau                                                              |                                                              | 12.6.1            | 12.6.1.4           | 12.15.3.4            |
| 16.4.1     | Prinzipien des Aminosäurestoffwechsels                                       |                                                              | 12.6.1            | 12.6.2.4           |                      |
| 16.4.2     | Stoffwechselprodukte von Aminosäurer                                         |                                                              | 12.6.1            | 12.6.3.1           | 12.6.3.2             |
| 16.4.3     | organbezogener Aminosäurestoffwechse                                         |                                                              | 12.6.1            |                    |                      |
| 16.5       | Ethanolabbau                                                                 |                                                              | 12.6.1            | 12.6.1.5           |                      |
| 16.6       | Pyruvat-Dehydrogenase, Citrat-Zyklus                                         |                                                              | 12.6.1            | 12.6.1.6           |                      |
| 16.7       | Atmungskette und oxidative Phosphorylierung                                  |                                                              | 12.6.1            |                    |                      |
| 16.7.1     | Aufbau                                                                       |                                                              | 12.6.1            |                    |                      |
| 16.7.2     | Arbeitsweise                                                                 |                                                              | 12.6.1            |                    |                      |
| 16.7.3     | Reaktive Sauerstoffspezies (ROS)                                             |                                                              | 12.6.1            |                    |                      |
| <b>17</b>  | <b>Anaboler Stoffwechsel und Aufbau von Energiespeichern</b>                 |                                                              | 13.3.15.1         | 13.3.15.3          | 13.3.15.4            |
| 17.1       | Kohlenhydrate                                                                |                                                              | 12.6.2.2          |                    |                      |
| 17.1.1     | Verwertung von Glucose                                                       |                                                              | 12.6.1            |                    |                      |
| 17.1.2     | Gluconeogenese                                                               |                                                              | 12.6.1            |                    |                      |
| 17.1.3     | Glykogensynthese                                                             |                                                              | 12.6.1            | 12.6.3.1           | 12.6.3.2             |
| 17.2       | Lipide                                                                       |                                                              | 12.6.2.3          |                    |                      |
| 17.2.1     | Stoffwechsel von Lipoproteinen und Fettsäuren                                |                                                              | 12.6.1, 12.15.3.2 | 12.6.3.1           | 12.6.3.2             |
| 17.2.2     | Fettsäuresynthese                                                            |                                                              | 12.6.1            | 12.6.2.1           |                      |
| 17.2.3     | Triacylglycerolsynthese (Triglyceridsynthese)                                |                                                              | 12.6.1            | 12.6.3.1           | 12.6.3.2             |
| <b>18</b>  | <b>Regulation des Energiestoffwechsels</b>                                   | Regelprozesse und Regelprinzipien                            | 12.2.1.1          | 13.3.15.1          | 13.3.15.3, 13.3.15.4 |
| 18.1       | Begriffe und Grundlagen                                                      |                                                              | 12.6.1            |                    |                      |
| 18.2       | Bildung von Energiespeichern                                                 |                                                              | 12.6.1            |                    | 12.6.3.2             |
| 18.3       | Speicherverwertung                                                           |                                                              | 12.6.1            | 12.10.3.6          |                      |
| 18.4       | Regulation des Glucoseabbaus und des Citrat-Zyklus                           |                                                              | 12.6.1            |                    |                      |
| <b>19</b>  | <b>Speicherung, Übertragung und Expression genetischer Information</b>       |                                                              | 13.2.6.1          | 13.2.6.4           |                      |
| 19.1       | Nucleotide                                                                   |                                                              | 12.6.2.5          |                    |                      |
| 19.1.1     | Synthese                                                                     |                                                              | 12.2.3            | 12.6.2             |                      |
| 19.1.2     | Funktion                                                                     |                                                              | 12.2.3            |                    |                      |
| 19.1.3     | Abbau                                                                        |                                                              | 12.2.3            | 12.6.1             | 12.6.1.9             |
| 19.2       | Nucleinsäuren                                                                |                                                              |                   |                    |                      |
| 19.2.1     | Grundbegriffe                                                                |                                                              | 12.2.5            | 12.2.3             |                      |
| 19.2.2     | DNA-Replikation                                                              |                                                              | 12.2.5            | 12.2.5.2           | 12.2.5.3             |
| 19.2.3     | DNA-Schädigung und Reparatur                                                 |                                                              | 12.2.5            | 12.2.5.4           |                      |
| 19.2.4     | Transkription                                                                |                                                              | 12.2.5            | 12.3.1.4           | 12.2.5.7             |
| 19.2.5     | Regulation der Transkription                                                 | Regulation von Enzymen durch allosterische Regulatoren       | 12.2.5, 12.5.3.3  | 12.2.4.3, 12.3.1.4 | 12.3.1.4, 12.2.5.7   |
| 19.2.6     | posttranskriptionelle Veränderungen                                          |                                                              | 12.2.5            | 12.3.1.4           | 12.2.5.7             |
| 19.2.7     | Translation                                                                  |                                                              | 12.2.5            | 12.2.5.7           |                      |
| 19.2.8     | Hemmstoffe der Translation                                                   | Regulation von Enzymen durch allosterische                   | 12.2.5            | 12.2.4.3           | 12.2.5.7             |
| 19.2.9     | Regulation der Translatior                                                   |                                                              | 12.2.5            | 12.2.4.3           | 12.2.5.7             |
| 19.2.10    | Viren                                                                        |                                                              | 12.2.5            | 12.2.5.2           |                      |
| 19.2.11    | Gentechnik                                                                   |                                                              | 12.2.5            |                    |                      |
| 19.2.12    | Analyse von Nucleinsäurer                                                    |                                                              | 12.2.5            | 12.2.5.1           |                      |
| 19.3       | Co- und posttranslationale Faltung und Modifikation von Proteinen, Proteomen |                                                              | 12.2.3.3          |                    |                      |
| 19.3.1     | Proteinfaltung                                                               |                                                              | 12.2.3            |                    |                      |
| 19.3.2     | Proteinsortierung                                                            | Mechanismen, durch die Proteine und RNA transportiert werden | 12.2.3            | 12.3.1.4           |                      |
| 19.3.3     | limitierte Proteolyse                                                        |                                                              | 12.2.3            |                    |                      |

|              |                                                                                          |                                                                                                                                                                          |                    |                     |                    |
|--------------|------------------------------------------------------------------------------------------|--------------------------------------------------------------------------------------------------------------------------------------------------------------------------|--------------------|---------------------|--------------------|
| 19.3.4       | Proteinglykosylierung                                                                    |                                                                                                                                                                          | 12.2.3             | 12.7.2.2            |                    |
| 19.3.5       | nichtenzymatische Glykierung                                                             |                                                                                                                                                                          | 12.2.3             |                     |                    |
| 19.3.6       | Verankerung von Proteinen an Membraner                                                   |                                                                                                                                                                          | 12.2.3             |                     |                    |
| 19.3.7       | reversible Modifikationen von Proteiner                                                  |                                                                                                                                                                          | 12.2.3             |                     |                    |
| 19.3.8       | Proteome                                                                                 |                                                                                                                                                                          | 12.2.3             |                     |                    |
| <b>19.4</b>  | <b>Proteolyse</b>                                                                        |                                                                                                                                                                          | 12.7.2.2           |                     |                    |
| 19.4.1       | Proteasen                                                                                |                                                                                                                                                                          | 12.2.4             |                     |                    |
| 19.4.2       | lysosomale Proteolyse                                                                    |                                                                                                                                                                          | 12.2.4             |                     |                    |
| 19.4.3.      | zytosolische Proteolyse                                                                  |                                                                                                                                                                          | 12.2.4             |                     |                    |
| <b>19.5</b>  | <b>Tumorbiochemie</b>                                                                    |                                                                                                                                                                          |                    |                     |                    |
| 19.5.1       | Kanzerogenese                                                                            | Mechanismen der Mutationsentstehung und DNA-Reparatur                                                                                                                    | 13.2.4             | 12.2.5.4            | 12.3.3.1           |
| 19.5.2       | Therapie                                                                                 |                                                                                                                                                                          | 16.4.9             | 16.5.62             |                    |
| 19.5.3       | Apoptose                                                                                 |                                                                                                                                                                          | 12.3.5             | 12.3.5.1            | 12.3.5.2, 12.7.2.2 |
| <b>20</b>    | <b>Molekulare Zellbiologie</b>                                                           |                                                                                                                                                                          |                    |                     |                    |
| <b>20.1</b>  | <b>Eukaryontische Zellen</b>                                                             |                                                                                                                                                                          | 12.3.1             | 12.3.1.1            |                    |
| 20.1.1       | Aufbau                                                                                   |                                                                                                                                                                          | 12.3.1             | 12.3.1.1            |                    |
| <b>20.2.</b> | <b>Membranen (s. a. GK Biol. 1.2)</b>                                                    | stoffliche Eigenschaften der Materie unkl. Phasen, -gleichgewichte und Gleichgewichte; Aufbau und Funktion von Proteinen; Aufbau unf Funktion von Fettsäuren und Lipiden | 12.9.1.4           | 12.2.3.3, 12.3.1.1  | 12.2.3.4, 12.3.1.2 |
| 20.2.1       | Membrankomponenten                                                                       |                                                                                                                                                                          | 12.3.1             | 12.3.1.1            |                    |
| 20.2.2       | Bildung und Abbau von Membraner                                                          |                                                                                                                                                                          | 12.3.1             | 12.3.1.1            |                    |
| 20.2.3       | Funktion                                                                                 |                                                                                                                                                                          | 12.3.1             | 12.3.2.1            | 12.12.2.2          |
| <b>20.3</b>  | <b>Zellkern (s. a. GK Biol. 1.3)</b>                                                     |                                                                                                                                                                          | 12.3.1             | 12.3.1.1            |                    |
| 20.3.1       | Chromatin                                                                                | Zelle, Chromosom                                                                                                                                                         | 12.3, 12.3.1       | 12.2.5, 12.3.1.1    | 12.2.5.1, 12.2.5.2 |
| 20.3.2       | Kernhülle                                                                                | Aufbau der Zelle                                                                                                                                                         | 12.3               | 12.2.5, 12.3.1.1    |                    |
| 20.3.3       | Funktionen                                                                               | "                                                                                                                                                                        | 12.3, 12.3.1       | 12.2.5, 12.3.1.1    | 12.2.5.1           |
| <b>20.4</b>  | <b>Mitochondrien (s. a. GK Biol. 1.12)</b>                                               |                                                                                                                                                                          | 12.3.1             | 12.3.1.1            |                    |
| 20.4.1       | Entstehung, Aufbau                                                                       | Aufbau der Zelle                                                                                                                                                         | 12.3.1             | 12.2.5.5            | 12.3.1.1           |
| 20.4.2       | Funktionen                                                                               |                                                                                                                                                                          | 12.3.1             | 12.3.1.1            |                    |
| <b>20.5</b>  | <b>Lysosomen (s. a. GK Biol. 1.8)</b>                                                    |                                                                                                                                                                          | 12.3.1             | 12.3.1.1            |                    |
| 20.5.1       | Entstehung, Aufbau                                                                       | Aufbau der Zelle                                                                                                                                                         | 12.3.1             | 12.3.1.1            | 12.3.1.4           |
| 20.5.2       | Funktionen                                                                               |                                                                                                                                                                          | 12.3.1             | 12.3.1.1            |                    |
| <b>20.6</b>  | <b>Peroxisomen (s. a. GK Biol.1.11)</b>                                                  |                                                                                                                                                                          | 12.3.1             | 12.3.1.1            |                    |
| <b>20.7</b>  | <b>Endoplasmatisches Retikulum (ER) (s. a. GK Biol. 1.6)</b>                             |                                                                                                                                                                          | 12.3.1             | 12.3.1.1            |                    |
| 20.7.1       | glattes ER                                                                               | Aufbau der Zelle                                                                                                                                                         | 12.3.1             | 12.3.1.1            |                    |
| 20.7.2       | raues ER                                                                                 |                                                                                                                                                                          | 12.3.1             | 12.3.1.1            | 12.3.1.4           |
| <b>20.8</b>  | <b>Golgi-Apparat (s. a. GK Biol. 1.7)</b>                                                |                                                                                                                                                                          | 12.3.1             | 12.3.1.1            |                    |
| 20.8.1       | Aufbau                                                                                   | Aufbau der Zelle                                                                                                                                                         | 12.3.1             | 12.3.1.1            |                    |
| 20.8.2       | Funktionen                                                                               |                                                                                                                                                                          | 12.3.1             | 12.3.1.1            |                    |
| <b>20.9</b>  | <b>Zytoskelett (s. a. GK Biol. 1.13)</b>                                                 |                                                                                                                                                                          | 12.3.1             | 12.3.1.1            | 12.3.1.3           |
| 20.9.1       | Aufbau und Funkti                                                                        | Aufbau der Zelle                                                                                                                                                         | 12.3.1             | 12.3.1.1            |                    |
| <b>20.10</b> | <b>Extrazelluläre Matrix</b>                                                             |                                                                                                                                                                          | 12.3.1             | 12.3.1.1            | 12.3.1.5           |
| 20.10.1      | Strukturprinzip, Vorkommen                                                               | Aufbau der Zelle                                                                                                                                                         | 12.3.1             |                     |                    |
| 20.10.2      | Synthese, Abbau                                                                          |                                                                                                                                                                          | 12.3.1             | 12.4.2.1            |                    |
| 20.10.3      | Funktion                                                                                 |                                                                                                                                                                          | 12.3.1             |                     |                    |
| <b>20.11</b> | <b>Zellzyklus (s. a. GK Biol. 1.14)</b>                                                  | Ablauf von Mitose und Meiose                                                                                                                                             | 12.2.5.6           |                     |                    |
| 20.11.1      | Ablauf und Regulation                                                                    |                                                                                                                                                                          | 12.3.3             | 12.7.2.2            |                    |
| <b>21</b>    | <b>Säure-Basen-Haushalt, Wasser- und Elektrolythaushalt, Spurenelemente und Schwefel</b> |                                                                                                                                                                          |                    |                     |                    |
| <b>21.1</b>  | <b>Säure-Basen-Haushalt (s. a. GK Physiol. 5.10)</b>                                     | Mechanismen der Regulation des zellulären pH-Wertes                                                                                                                      | 12.3.2.4           |                     |                    |
| 21.1.1       | Protonenbilanz                                                                           | Reaktionstypen bei Säuren, Basen                                                                                                                                         | 12.2.2.6           |                     |                    |
| 21.1.2       | pH-Homöostase                                                                            | pH                                                                                                                                                                       | 12.3.2             | 12.14.3.5           |                    |
| <b>21.2</b>  | <b>Wasser- und Elektrolythaushalt</b>                                                    | Funktion von Elektrolyten und Spurenelementer                                                                                                                            | 12.2.3.7           | 12.16.2             | 12.16.3.3          |
| 21.2.1       | Stoffwechsel des Wassers                                                                 |                                                                                                                                                                          | 12.16.2            | 12.16.2.2           |                    |
| 21.2.2       | Biochemie der Elektrolyte                                                                |                                                                                                                                                                          | 12.16.2, 12.16.2.4 | 12.5.2.3, 12.16.2.5 | 12.16.2.3          |
| <b>21.3</b>  | <b>Spurenelemente</b>                                                                    |                                                                                                                                                                          | 12.2.3.7           |                     |                    |
| 21.3.1       | Eisen                                                                                    |                                                                                                                                                                          | 12.2.3             |                     |                    |
| 21.3.2       | Kupfer                                                                                   |                                                                                                                                                                          | 12.2.3             |                     |                    |
| 21.3.3       | Zink                                                                                     |                                                                                                                                                                          | 12.2.3             |                     |                    |
| 21.3.4       | Iod                                                                                      |                                                                                                                                                                          | 12.2.3             |                     |                    |
| 21.3.5       | Selen                                                                                    |                                                                                                                                                                          | 12.2.3             |                     |                    |
| <b>21.4</b>  | <b>Schwefel</b>                                                                          | Funktion von Elektrolyten und Spurenelementen                                                                                                                            | 12.2.3.7           |                     |                    |
| <b>22</b>    | <b>Bewegung</b>                                                                          |                                                                                                                                                                          | 12.3.1.3           |                     |                    |
| <b>22.1</b>  | <b>Kontraktile Systeme (s. a. GK Physiol. Kap. 13)</b>                                   |                                                                                                                                                                          |                    |                     |                    |
| 22.1.1       | Actomyosin- System in Muskelzeller                                                       | Aufbau Muskelgewebe                                                                                                                                                      | 12.4.3             | 12.3.1.3            | 12.4.3.2           |
| <b>22.2</b>  | <b>Motile Systeme</b>                                                                    |                                                                                                                                                                          |                    |                     |                    |
| 22.2.1       | mikrotubuläres System                                                                    | Organellen und Komponenten des                                                                                                                                           | 12.3.1.3           |                     |                    |
| 22.2.2       | Actin in Nichtmuskelzellen                                                               |                                                                                                                                                                          | 12.3.1.3           |                     |                    |
| <b>23</b>    | <b>Hormone, hormonähnliche Signalstoffe und Cytokine (s. a. GK Physiol. Kap. 10)</b>     |                                                                                                                                                                          | 12.5.              |                     |                    |

|             |                                                                            |                                                                                                 |                                |                                    |                                       |
|-------------|----------------------------------------------------------------------------|-------------------------------------------------------------------------------------------------|--------------------------------|------------------------------------|---------------------------------------|
| <b>23.1</b> | <b>Grundlagen</b>                                                          | Regelprozesse und Regelprinzipien                                                               | 12.2.1.1                       | 12.5.1                             |                                       |
| 23.1.1      | Grundlagen der hormonellen Kommunikation                                   |                                                                                                 | 12.5.1                         | 12.5.2.2                           |                                       |
| 23.1.2      | Hormone, Cytokine und hormonähnliche Substanzen                            |                                                                                                 | 12.5.1                         | 12.5.1.4                           | 12.5.1.5                              |
| 23.1.3      | Hormon- und Cytokinrezeptoren                                              |                                                                                                 | 12.5.1,<br>12.5.2,<br>12.5.3.1 | 12.5.1.4,<br>12.5.2.2,<br>12.5.3.3 | 12.5.1.5,<br>12.5.2.1,<br>12.5.3.2    |
| 23.1.4      | Signaltransduktion                                                         |                                                                                                 | 12.5.1,<br>12.5.3,<br>12.5.2.1 | 12.5.1.4,<br>12.5.3.1,<br>12.5.1.5 | 12.18.6.2,<br>12.18.9.1,<br>12.18.7.2 |
| 23.1.5      | Neurohormone                                                               |                                                                                                 | 12.5.1,<br>12.5.1.6            | 12.5.1.4                           | 12.5.1.5                              |
| <b>23.2</b> | <b>Biochemie von Hormonen (s. a. GK Physiol. 10.2)</b>                     |                                                                                                 | 12.5.1.8                       |                                    |                                       |
| 23.2.1      | Insulin                                                                    | Hormon                                                                                          | 12.5.1                         |                                    |                                       |
| 23.2.2      | Glucagon                                                                   |                                                                                                 | 12.5.1                         |                                    |                                       |
| 23.2.3      | Adrenalin und Noradrenalin                                                 |                                                                                                 | 12.5.1                         | 12.11.6.5                          |                                       |
| 23.2.4      | Glucocorticoide                                                            |                                                                                                 | 12.5.1                         | 12.5.1.3                           |                                       |
| 23.2.5      | Somatotropin (STH, GH)                                                     |                                                                                                 | 12.5.1                         | 12.5.1.3                           |                                       |
| 23.2.6      | Schilddrüsenhormone                                                        |                                                                                                 | 12.5.1                         | 12.5.1.3                           | 12.11.6.5                             |
| 23.2.7      | Sexualhormone                                                              |                                                                                                 | 12.5.1,<br>12.17.3.1           | 12.5.1.3                           | 12.17.2.4                             |
| 23.2.8      | Prolactin                                                                  |                                                                                                 | 12.5.1                         | 12.17.3.1                          |                                       |
| 23.2.9      | Oxytocin                                                                   |                                                                                                 | 12.5.1                         |                                    |                                       |
| 23.2.10     | gastrointestinale Hormone                                                  |                                                                                                 | 12.5.1                         | 12.15.2.3                          | 12.15.4.2                             |
| 23.2.11     | orexigen und anorexigen wirkende Hormone und Mediatoren                    |                                                                                                 | 12.5.1                         | 12.6.4.3                           | 12.15.4.2                             |
| 23.2.12     | Aldosteron                                                                 |                                                                                                 | 12.5.1                         | 12.11.6.5                          |                                       |
| 23.2.13     | Renin-Angiotensin-System                                                   |                                                                                                 | 12.5.1                         | 12.11.6.5                          |                                       |
| 23.2.14     | atriales natriuretisches Hormon (Atriopeptin, ANF)                         |                                                                                                 | 12.5.1                         | 12.11.6.5                          |                                       |
| 23.2.15     | Adiuretin (Vasopressin)                                                    |                                                                                                 | 12.5.1                         |                                    |                                       |
| 23.2.16     | Parathormon                                                                |                                                                                                 | 12.5.1                         | 12.16.2.5                          |                                       |
| 23.2.17     | Calcitonin                                                                 |                                                                                                 | 12.5.1                         |                                    |                                       |
| 23.2.18     | Calciferole                                                                |                                                                                                 | 12.5.1                         | 12.16.2.5                          |                                       |
| 23.2.19     | Histamin                                                                   |                                                                                                 | 12.5.1                         | 12.13.1.2                          |                                       |
| 23.2.20     | Serotonin                                                                  |                                                                                                 | 12.5.1                         |                                    |                                       |
| 23.2.21     | Kinine (Bradykinin, Kallidin)                                              |                                                                                                 | 12.5.1                         | 12.13.1.2                          |                                       |
| 23.2.22     | Eicosanoide (Prostaglandine, Leukotriene, Thromboxane)                     |                                                                                                 | 12.5.1                         | 12.12.2.3                          | 12.13.1.2                             |
| <b>23.3</b> | <b>Biochemie der Cytokine</b>                                              |                                                                                                 | 12.13.1.2                      |                                    |                                       |
| 23.3.1      | proinflammatorische Cytokine                                               | Cytokin                                                                                         | 12.5.1                         |                                    |                                       |
| 23.3.2      | Chemokine                                                                  |                                                                                                 | 12.5.1                         |                                    |                                       |
| 23.3.3      | Interleukine                                                               |                                                                                                 | 12.5.1                         |                                    |                                       |
| 23.3.4      | Wachstumsfaktoren                                                          |                                                                                                 | 12.5.1                         |                                    |                                       |
| 23.3.5      | Cytokinmangel, -überschuss                                                 |                                                                                                 | 12.5.1                         |                                    |                                       |
| <b>24</b>   | <b>Immunsystem</b>                                                         |                                                                                                 | 12.13.1.1                      |                                    |                                       |
| <b>24.1</b> | <b>Zellen des Immunsystems</b>                                             |                                                                                                 | 12.13.1,<br>12.13.4.1          | 12.13.1                            | 12.13.3.2                             |
| <b>24.2</b> | <b>Begriffe</b>                                                            |                                                                                                 | 12.13.1                        | 12.13.4.4                          |                                       |
| <b>24.3</b> | <b>Immunglobuline</b>                                                      |                                                                                                 | 12.13.4                        | 12.13.4.2                          |                                       |
| <b>24.4</b> | <b>Histokompatibilitätsantigene, Antigenpräsentation</b>                   |                                                                                                 | 12.13.4                        | 12.13.4.4                          |                                       |
| <b>24.5</b> | <b>T-Zellrezeptor, T-Zell-Antigenerkennung</b>                             |                                                                                                 | 12.13.4                        | 12.13.4.2                          |                                       |
| <b>24.6</b> | <b>Unspezifische Immunantwort</b>                                          |                                                                                                 | 12.13.3                        | 12.13.3.1                          |                                       |
| <b>24.7</b> | <b>Spezifische Immunantwort</b>                                            |                                                                                                 | 12.13.4                        | 12.13.4.1                          | 12.13.4.3                             |
| <b>24.8</b> | <b>Immunologische Abwehrmechanismen</b>                                    |                                                                                                 | 12.13.3                        | 12.13.4                            |                                       |
| <b>25</b>   | <b>Blut</b>                                                                |                                                                                                 | 12.12.1                        |                                    |                                       |
| <b>25.1</b> | <b>Erythropoese und Erythrozyten (s. a. GK Physiol. 2.2)</b>               |                                                                                                 |                                |                                    |                                       |
| 25.1.1      | Sauerstoffaufnahme und -versorgung                                         |                                                                                                 | 12.12.2                        | 12.11.6.11                         | 12.12.2.1                             |
| 25.1.2      | CO <sub>2</sub> -Transport                                                 |                                                                                                 | 12.12.2                        | 12.12.2.1                          |                                       |
| 25.1.3      | Hämoglobin                                                                 |                                                                                                 | 12.12.1                        | 12.12.2.1                          |                                       |
| 25.1.4      | Erythropoese und Erythrozytenabbau                                         |                                                                                                 | 12.12.1,<br>12.12.1.4          | 12.11.6.11                         | 12.12.1.1                             |
| 25.1.5      | Stoffwechsel                                                               |                                                                                                 | 12.12.2                        | 12.11.6.11                         | 12.12.2.4                             |
| <b>25.2</b> | <b>Granulozyten, Makrophagen</b>                                           |                                                                                                 | 12.12.1,<br>12.13.3.2          | 12.12.1.1                          | 12.13.1                               |
| <b>25.3</b> | <b>Lymphozyten</b>                                                         |                                                                                                 | 12.12.1                        | 12.12.1.1                          |                                       |
| <b>25.4</b> | <b>Blutstillung, Blutgerinnung und Fibrinolyse (s. a. GK Physiol. 2.4)</b> |                                                                                                 | 12.12.2                        |                                    |                                       |
| 25.4.1      | Thrombozyten                                                               |                                                                                                 | 12.12.1                        |                                    |                                       |
| 25.4.2      | Blutgerinnung                                                              |                                                                                                 | 12.12.2                        |                                    |                                       |
| 25.4.3      | Fibrinolyse                                                                |                                                                                                 | 12.12.2                        |                                    |                                       |
| <b>25.5</b> | <b>Blutplasma (s. a. GK Physiol. 2.3)</b>                                  |                                                                                                 | 12.12.1,<br>12.15.3.2          | 12.12.1.3                          | 12.12.2.2                             |
| <b>26</b>   | <b>Leber</b>                                                               |                                                                                                 | 12.15.3                        |                                    |                                       |
| <b>26.1</b> | <b>Energiestoffwechsel</b>                                                 |                                                                                                 | 12.15.3                        | 12.6.4                             | 12.6.4.1                              |
| <b>26.2</b> | <b>Serviceleistungen</b>                                                   |                                                                                                 | 12.15.3,<br>12.15.3.3          | 12.6.4.1,<br>12.15.3.4             | 12.6.4.3                              |
| <b>26.3</b> | <b>Cholesterin (Cholesterin)</b>                                           |                                                                                                 | 12.15.3                        | 12.15.2.6                          | 12.15.3.2                             |
| <b>26.4</b> | <b>Gallenflüssigkeit und Gallensäuren (s. a. GK Physiol. 7.3.5)</b>        |                                                                                                 | 12.15.3                        | 12.15.2.6                          | 12.15.3.5                             |
| <b>26.5</b> | <b>Biotransformation</b>                                                   |                                                                                                 | 12.15.3.5                      | 12.15.3.6                          |                                       |
| 26.5.1      | Prinzip und Bedeutung                                                      |                                                                                                 | 12.15.3                        |                                    |                                       |
| 26.5.2      | Phase 1                                                                    |                                                                                                 | 12.15.3                        |                                    |                                       |
| 26.5.3      | Phase 2                                                                    |                                                                                                 | 12.15.3                        |                                    |                                       |
| 26.5.4      | Phase 3                                                                    |                                                                                                 | 12.15.3                        |                                    |                                       |
| 26.5.5      | Induktion des Biotransformationssystems                                    |                                                                                                 | 12.15.3                        |                                    |                                       |
| <b>26.6</b> | <b>Endokrine Funktionen</b>                                                |                                                                                                 | 12.15.3                        |                                    |                                       |
| <b>26.7</b> | <b>Leberfunktionsstörungen</b>                                             |                                                                                                 | 12.15.3                        |                                    |                                       |
| <b>27</b>   | <b>Magen-Darm-Trakt</b>                                                    |                                                                                                 |                                |                                    |                                       |
| <b>27.1</b> | <b>Grundlagen der Ernährung (s. a. GK Physiol. 7.1.1, 7.1.2 und 8.1.2)</b> | Aufbau und Funktion von Vitaminen und Cofaktoren; Funktion von Elektrolyten und Spurenelementen | 12.2.3.6                       | 12.2.3.7                           |                                       |
| 27.1.1      | Nahrungsbestandteile                                                       |                                                                                                 | 12.15.4                        | 12.15.4.1                          |                                       |

|           |                                                                                           |                                                  |                                |                       |                       |
|-----------|-------------------------------------------------------------------------------------------|--------------------------------------------------|--------------------------------|-----------------------|-----------------------|
| 27.1.2    | Bilanz                                                                                    |                                                  | 12.15.4                        |                       |                       |
| 27.2      | <b>Verdauung und Resorption(s. a. GK Physiol. 7.3, 7.4 und 7.5)</b>                       | Aufbau und Funktion von Vitaminen und Cofaktoren | 12.2.3.6,<br>12.15.2.5         | 12.2.3.6              | 12.15.2.2             |
| 27.2.1    | Verdauungssekrete                                                                         |                                                  | 12.15.2                        | 12.15.2.5             |                       |
| 27.2.2    | Kohlenhydrate                                                                             |                                                  | 12.15.2                        | 12.15.2.4             | 12.15.2.5             |
| 27.2.3    | Proteine                                                                                  |                                                  | 12.15.2                        | 12.15.2.4             | 12.15.2.5             |
| 27.2.4    | Lipide                                                                                    |                                                  | 12.15.2                        | 12.15.2.4             | 12.15.2.5             |
| 27.2.5    | Vitamine                                                                                  |                                                  | 12.15.2                        | 12.15.2.5             |                       |
| 27.2.6    | Hypo- und Hypervitaminosen (s. a. GK Physiol. 7.1.2)                                      |                                                  | 12.15.2                        | 12.15.2.5             |                       |
| 27.2.7    | Wasser, Elektrolyte und nicht verdaute Nahrungsbestandteile                               |                                                  | 12.15.2,<br>12.15.2.5          | 12.15.4,<br>12.15.2.7 | 12.5.2.3              |
| 27.3      | <b>Endokrine Funktionen</b>                                                               |                                                  | 13.3.10                        | 12.15.2.5             |                       |
| <b>28</b> | <b>Fettgewebe</b>                                                                         |                                                  | 12.6.4                         | 12.6.4.1              | 12.6.4.3              |
| 28.1      | Stoffwechseleistungen                                                                     |                                                  | 12.6.1                         | 12.6.2                | 12.6.5.2,<br>12.6.5.3 |
| 28.2      | Endokrine Funktionen                                                                      |                                                  | 12.6.5.3                       |                       |                       |
| <b>29</b> | <b>Niere</b>                                                                              |                                                  | 12.6.5.3                       | 12.6.5.3              |                       |
| 29.1      | Stoffwechsel                                                                              |                                                  | 12.6.4                         | 12.6.4.1              |                       |
| 29.2      | Endokrine Funktionen                                                                      |                                                  | x                              |                       |                       |
| 29.3      | Grundlagen der Harnbildung (s. a. GK Physiol. 9.2)                                        |                                                  | 12.16.3                        | 12.16.3.2             |                       |
| 29.4      | Ausscheidung von Säuren und Ammoniak                                                      |                                                  | 12.16.2                        | 12.16.2.6             |                       |
| <b>30</b> | <b>Muskulatur (s. a. GK Physiol. Kap. 13)</b>                                             |                                                  |                                |                       |                       |
| 30.1      | Energiestoffwechsel                                                                       |                                                  | 12.6.4.1                       | 12.6.4                | 12.10.3.4             |
| 30.1.1    | Skelettmuskel                                                                             |                                                  | 12.10.3                        | 12.6.4.3              |                       |
| 30.1.2    | Herzmuskel                                                                                |                                                  | x                              |                       |                       |
| 30.1.3    | glatte Muskulatur                                                                         |                                                  | x                              |                       |                       |
| 30.2      | Kontraktion, Relaxation                                                                   |                                                  | 12.4.3                         | 12.10.3               | 12.4.3.2              |
| 30.3      | Endokrine Funktion                                                                        |                                                  | 12.10.3                        |                       |                       |
| <b>31</b> | <b>Aufbau des Stützgewebes</b>                                                            |                                                  |                                |                       |                       |
| 31.1      | Extrazelluläre Matrix                                                                     |                                                  | 12.3.1                         | 12.4.2                |                       |
| 31.2      | Knorpelgewebe (s. a. GK Anat.2.5.3)                                                       |                                                  | 12.10.1                        |                       |                       |
| 31.3      | Knochen, Zahnhartsubstanz (s. a. GK Anat. 2.5.4 und 2.5.5)                                |                                                  | 12.10.1                        | 12.4.2                | 12.4.2.4              |
| <b>32</b> | <b>Nervensystem</b>                                                                       |                                                  |                                |                       |                       |
| 32.1      | Stoffwechsel                                                                              |                                                  | 12.18.2,<br>12.6.4.3           | 12.6.4                | 12.6.4.1              |
| 32.2      | Blut-Hirn-Schranke, Liquor cerebrospinalis (s. a. GK Anat. 9.11.2 und 9.9.4)              |                                                  | 12.18.1                        | 12.9.1.4              |                       |
| 32.3      | Myelin                                                                                    |                                                  | 12.4.4                         | 12.4.4.1              |                       |
| 32.4      | Erregungsleitung und –übertragung durch Neurotransmitter (s. a. GK Physiol. 12.3 u. 12.4) |                                                  | 12.4.4.3                       | 12.5.1.7              |                       |
| 32.4.1    | Grundlagen der Erregungsübertragung                                                       | Zustandekommen des Membranpotentials             | 12.5.1,<br>12.5.2,<br>12.5.2.3 | 12.5.2,<br>12.5.2.1   | 12.3.2.2,<br>12.5.2.2 |
| 32.4.2    | Acetylcholin                                                                              |                                                  | 12.5.1                         | 12.5.2,<br>12.5.1.8   | 12.5.1.6              |
| 32.4.3    | Catecholamine                                                                             |                                                  | 12.5.1                         | 12.5.2,<br>12.5.1.8   | 12.5.1.6              |
| 32.4.4    | Glutamat                                                                                  |                                                  | 12.5.1                         | 12.5.2,<br>12.5.8     | 12.5.1.6              |
| 32.4.5    | GABA                                                                                      |                                                  | 12.5.1                         | 12.5.2,<br>12.5.8     | 12.5.1.6              |
| 32.4.6    | Glycin                                                                                    |                                                  | 12.5.1                         | 12.5.2,<br>12.5.8     | 12.5.1.6              |
| 32.4.7    | Serotonin                                                                                 |                                                  | 12.5.1                         | 12.5.2,<br>12.5.8     | 12.5.1.6              |
| 32.4.8    | Stickstoffmonoxid (NO)                                                                    |                                                  | 12.5.1                         | 12.5.2,<br>12.5.8     | 12.5.1.6              |
| 32.4.9    | Nucleotide und Nucleoside                                                                 |                                                  | 12.5.1                         | 12.5.2                | 12.5.1.8              |
| 32.4.10   | peptiderge Neurotransmitter                                                               |                                                  | 12.5.1                         | 12.5.2                | 12.5.1.8              |
| 32.4.11   | lipiderge Neurotransmitter                                                                |                                                  | 12.5.1                         | 12.5.2                | 12.5.1.8              |
| <b>33</b> | <b>Sinnesbiochemie (s. a. GK Physiol. 17.2 und 19.3)</b>                                  |                                                  |                                |                       |                       |
| 33.1      | Sehen                                                                                     |                                                  | 12.18.3                        |                       |                       |
| 33.2      | Riechen                                                                                   |                                                  | 12.18.5                        | 12.18.5.2             |                       |

### 3.3. Physik für Mediziner

| GK Physik |                                                                     | Abgleich mit NKLM |          |  |
|-----------|---------------------------------------------------------------------|-------------------|----------|--|
| <b>1</b>  | <b>Grundbegriffe des Messens und der quantitativen Beschreibung</b> |                   |          |  |
| 1.1       | Physikalische Größen und Einheiten                                  | 12.2.1            | 12.10.1  |  |
| 1.2       | Mengengrößen, bezogene Größen                                       | x                 |          |  |
| 1.3       | Messen und Unsicherheiten beim Messen                               | 14a.2.2           | 14a.2.3  |  |
| 1.4       | Zusammenhänge zwischen physikalischen Größen                        | 12.2.1            |          |  |
| <b>2</b>  | <b>Mechanik</b>                                                     | 12.2.1.2          |          |  |
| 2.1       | Bewegungen                                                          | 12.2.1.2          |          |  |
| 2.2       | Impuls, Kraft                                                       | 12.2.1.2          |          |  |
| 2.3       | Drehmoment, Trägheitsmoment, Drehimpuls                             | 12.2.1.2          |          |  |
| 2.4       | Arbeit, Energie; Leistung                                           | 12.2.1.2          |          |  |
| 2.5       | Verformung fester Körper                                            | 12.2.1.2          |          |  |
| 2.6       | Druck                                                               | 12.2.1.2          |          |  |
| 2.7       | Kräfte an Grenzflächen                                              | 12.2.1.2          | 12.2.1.7 |  |
| 2.8       | Strömung von Flüssigkeiten und Gasen                                | 12.2.1.2          | 12.2.1.8 |  |
| <b>3</b>  | <b>Struktur der Materie</b>                                         |                   |          |  |
| 3.1       | Aufbau der Atome und Atomkerne                                      | 12.2.2            |          |  |
| 3.2       | Festkörper, Flüssigkeiten, Gase                                     | 12.2.2            |          |  |
| <b>4</b>  | <b>Wärmelehre</b>                                                   | 12.2.1.3          |          |  |
| 4.1       | Temperatur                                                          | 12.2.1.3          |          |  |
| 4.2       | Wärme, Wärmekapazität                                               | 12.2.1.3          |          |  |
| 4.3       | Gaszustand                                                          | 12.2.1.3          | 12.2.1.7 |  |
| 4.4       | Änderung des Aggregatzustands                                       | 12.2.1.3          |          |  |
| 4.5       | Wärmetransport, Transportphänomene                                  | 12.2.1.3          |          |  |
| 4.6       | Stoffgemische                                                       | 12.2.1.3          |          |  |
| <b>5</b>  | <b>Elektrizitätslehre</b>                                           | 12.2.1.5          |          |  |
| 5.1       | Elektrische Stromstärke, elektrische Ladung                         | 12.2.1.5          |          |  |
| 5.2       | Elektrische Feldstärke                                              | 12.2.1.5          |          |  |
| 5.3       | Elektrisches Potential, elektrische Spannung                        | 12.2.1.5          |          |  |
| 5.4       | Elektrischer Widerstand                                             | 12.2.1.5          |          |  |
| 5.5       | Elektrischer Stromkreis                                             | 12.2.1.5          |          |  |
| 5.6       | Elektrische Kapazität                                               | 12.2.1.5          |          |  |
| 5.7       | Elektrizitätsleitung                                                | 12.2.1.5          |          |  |
| 5.8       | Elektrische Spannungen an Grenzflächen, Diffusionsspannungen        | 12.2.1.5          |          |  |
| 5.9       | Magnetische Größen, elektromagnetische Induktion                    | 12.2.1.5          |          |  |
| 5.10      | Wechselspannung, Wechselstrom                                       | 12.2.1.5          |          |  |
| <b>6</b>  | <b>Schwingungen und Wellen</b>                                      | 12.2.1.4          |          |  |
| 6.1       | Schwingungen                                                        | 12.2.1.4          |          |  |
| 6.2       | Wellen                                                              | 12.2.1.4          |          |  |
| 6.3       | Schallwellen                                                        | 12.2.1.4          |          |  |
| 6.4       | Elektromagnetische Wellen                                           | 12.2.1.4          |          |  |
| <b>7</b>  | <b>Optik</b>                                                        | 12.2.1.6          |          |  |
| 7.1       | Licht                                                               | 12.2.1.6          |          |  |
| 7.2       | Geometrische Optik                                                  | 12.2.1.6          |          |  |
| 7.3       | Wellenoptik                                                         | 12.2.1.6          |          |  |
| 7.4       | Optische Instrumente                                                | 12.2.1.6          |          |  |
| <b>8</b>  | <b>Ionisierende Strahlung</b>                                       | 12.2.1.9          |          |  |
| 8.1       | Röntgenstrahlung                                                    | 12.2.1.9          |          |  |
| 8.2       | Radioaktivität                                                      | 12.2.1.9          |          |  |
| 8.3       | Nachweis ionisierender Strahlen                                     | 12.2.1.9          |          |  |
| 8.4       | Strahlenwirkungen                                                   | 12.2.1.9          |          |  |

### 3.4. Anatomie

| GK Anatomie                                               |                                                                  | Abgleich mit NKLM                          |                                 |                             |
|-----------------------------------------------------------|------------------------------------------------------------------|--------------------------------------------|---------------------------------|-----------------------------|
| <b>1 Allgemeine Embryologie</b>                           |                                                                  |                                            |                                 |                             |
| 1.1                                                       | <b>Grundlagen der Reproduktion</b>                               | 12.3.4,<br>12.17.2                         | 12.7                            | 12.7.1                      |
| 1.1.1                                                     | Keimzellen                                                       | 12.7.1                                     | 12.7.1.1                        | 12.17.2.1                   |
| 1.1.2                                                     | Oogenese und weibliches Genitalsystem                            | 12.7.1                                     | 12.17.2.1                       | 12.17.2.4                   |
| 1.1.3                                                     | Spermatogenese und männliches Genitalsystem                      | 12.7.1                                     | 12.17.2.1                       |                             |
| 1.1.4                                                     | Verlauf von Schwangerschaft und Geburt                           | 12.7.1                                     | 12.17.3                         | 12.17.3                     |
| 1.2                                                       | <b>Grundlagen der Embryologie</b>                                | 12.3.5,<br>12.3.4.2,<br>12.7.1.3, 12.7.1.5 | 12.3.3.4, 12.3.5.1,<br>12.7     | 12.3.4, 12.7.1,<br>12.7.1.4 |
| 1.2.1                                                     | Grundbegriffe der Embryonalentwicklung                           | 12.3.3, 12.3.3.3,<br>12.7.1.3              | 12.3.4, 12.3.3.4                | 12.7.1, 12.3.4.1,<br>12.3.5 |
| 1.2.2                                                     | Molekularbiologie der Entwicklung                                | 12.3.3, 12.3.5,<br>12.7.1.3                | 12.3.4, 12.3.3.4                | 12.7.1                      |
| 1.3                                                       | <b>Befruchtung, Furchung und Implantation</b>                    | 12.3.3.4,<br>12.3.5.3,<br>12.7.1.6         | 12.3.5, 12.7.1.3                | 12.3.5.2                    |
| 1.3.1                                                     | Befruchtung                                                      | 12.7.1, 12.3.5                             | 12.3.4.1, 12.7.1.3              | 12.3.3.4                    |
| 1.3.2                                                     | Furchung                                                         | 12.7.1, 12.3.5                             | 12.3.3.4, 12.3.4.1              | 12.7.1.3                    |
| 1.3.3                                                     | Blastozyste                                                      | 12.7.1, 12.3.5                             | 12.3.3.4, 12.7.1.3              |                             |
| 1.3.4                                                     | Implantation                                                     | 12.7.1, 12.3.5                             | 12.3.3.4, 12.7.1.3              |                             |
| 1.4                                                       | <b>Plazentation</b>                                              | 12.3.3.4                                   | 12.3.5, 12.7.1.3                |                             |
| 1.4.1                                                     | Ausbildung des uteroplazentaren Kreislaufs                       | 12.7.1, 12.17.3.2                          | 12.17.3, 12.7.1.3               | 12.3.3.4                    |
| 1.4.2                                                     | Form, Feinbau und Funktion der reifen Plazenta                   | 12.7.1, 12.17.3.2                          | 12.1.7.3                        | 12.3.3.4                    |
| 1.4.3                                                     | Ablösung der Plazenta                                            | 12.7.1, 12.17.3.2                          | 12.1.7.3                        | 12.3.3.4                    |
| 1.5                                                       | <b>Frühentwicklung und Körperbauplan (Embryogenese)</b>          | 12.3.5, 12.3.5.2,<br>12.7.1.4              | 12.3.3.4, 12.3.5.3,<br>12.7.1.6 | 12.3.5.1, 12.7.1.2          |
| 1.5.1                                                     | Entwicklung der Keimscheibe und des extraembryonalen Gewebes     | 12.3.3, 12.3.4.1                           | 12.7.1                          | 12.3.4.1, 12.3.3.4          |
| 1.5.2                                                     | Differenzierung der Keimscheibe                                  | 12.3.3                                     | 12.7.1                          | 12.3.3.4                    |
| 1.5.3                                                     | Anlage des Nervensystems                                         | 12.3.3                                     | 12.7.1                          | 12.3.3.4                    |
| 1.5.4                                                     | Ausbildung der Körperform                                        | 12.3.3                                     | 12.7.1                          | 12.3.3.4                    |
| 1.6                                                       | <b>Entwicklung und Reifung der Organe (Organogenese)</b>         | 12.3.3.4, 12.4.1.1                         | 12.3.5.2, 12.7.1.6              | 12.3.5.3                    |
| 1.6.1                                                     | Stadieneinteilung, Alters- und Längenangaben                     | 12.7.1                                     |                                 |                             |
| 1.6.2                                                     | Entwicklung von Embryo und Fetus                                 | 12.7.1                                     |                                 |                             |
| 1.7                                                       | <b>Zwillinge, Mehrlinge</b>                                      | x                                          |                                 |                             |
| 1.8                                                       | <b>Fehlbildungen</b>                                             | 20.3                                       |                                 |                             |
| <b>2 Allgemeine Anatomie, Gewebelehre und Histogenese</b> |                                                                  | 12.8.3.1                                   |                                 |                             |
| 2.1                                                       | <b>Allgemeine Anatomie</b>                                       | 12.3.4.2                                   | 12.7.1.5                        |                             |
| 2.1.1                                                     | Gestalt                                                          | 12.3.4.2                                   |                                 |                             |
| 2.1.2                                                     | allgemeine Begriffe                                              | 12.3.3.3, 12.8.2.4                         | 12.3.4.2                        | 12.8.2.1, 12.8.2.5          |
| 2.1.3                                                     | postnatale Änderung der Gestalt                                  | 12.3.4.2                                   | 12.8.2.4                        | 12.8.2.5                    |
| 2.2                                                       | <b>Methoden</b>                                                  | 12.7.1.5                                   |                                 |                             |
| 2.3                                                       | <b>Epithelgewebe</b>                                             | 12.3.4.2, 12.4.1.2,<br>12.7.1.5            | 12.4.1.1, 12.4.1.3,<br>1.4.1.5  | 12.4, 12.4.1,<br>12.1.4.4   |
| 2.3.1                                                     | Oberflächenepithelien                                            | 12.4.1, 12.7.1.5                           | 12.3.4.2                        | 12.4                        |
| 2.3.2                                                     | Drüsenepithelien und Sekretion (s. a. GK Physiol. 1.3.2 und 7.3) | 12.4.1, 12.7.1.5                           | 12.3.4.2                        | 12.4                        |
| 2.4                                                       | <b>Allgemeine Anatomie der exokrinen und endokrinen Drüsen</b>   | 12.4                                       | 12.3.4.2                        | 12.3.4.2                    |
| 2.4.1                                                     | exokrine Drüsen                                                  | 12.4.1, 12.7.1.5                           | 12.3.4.2                        | 12.4                        |

|             |                                                                            |                                    |                                |                            |
|-------------|----------------------------------------------------------------------------|------------------------------------|--------------------------------|----------------------------|
| 2.4.2       | endokrine Drüsen                                                           | 12.4.1, 12.4                       | 12.5.1, 12.5                   | 12.3.4.2, 12.7.1.5         |
| <b>2.5</b>  | <b>Binde- und Stützgewebe</b>                                              | 12.3.1.5, 12.4, 12.4.2.4, 12.7.1.5 | 12.3.4.2, 12.4.2.5, 12.4.26    | 12.4.2, 12.4.2.1, 12.4.2.2 |
| 2.5.1       | Bindegewebe                                                                | 12.4.2, 12.7.1.5                   | 12.3.4.2                       | 12.4                       |
| 2.5.2       | Fettgewebe (s. a. GK Chemie/Bioch. Kap.28)                                 | 12.9.1, 12.4, 12.7.1.5             | 12.6.5, 12.9.1.2               | 12.4.2, 12.3.4.2           |
| 2.5.3       | Knorpelgewebe                                                              | 12.10.1, 12.4                      | 12.7.1.5, 12.10.3              | 12.3.4.2, 12.10.2.2        |
| 2.5.4       | Knochengewebe                                                              | 12.4, 12.7.1.5                     | 12.10.1, 12.10.2.2             | 12.4.2.4, 12.3.4.2         |
| 2.5.5       | Zahnhartsubstanzen                                                         | 12.4.2, 12.7.1.5                   | 12.3.4.2                       | 12.4                       |
| <b>2.6</b>  | <b>Muskelgewebe (s. a. Physiol. Kap. 13)</b>                               | 12.3.4.2, 12.4.3.1                 | 12.4.3, 12.4.3.2               | 12.4, 12.7.1.5             |
| 2.6.1       | Skelettmuskulatur                                                          | 12.4.3, 12.3.4.2                   | 12.10.1, 12.4                  | 12.10.3, 12.7.1.5          |
| 2.6.2       | Herzmuskulatur(s. a. 7.5)                                                  | 12.4.3, 12.7.1.5                   | 12.3.4.2                       | 12.4                       |
| 2.6.3       | glatte Muskulatur                                                          | 12.4.3, 12.7.1.5                   | 12.3.4.2                       | 12.4                       |
| <b>2.7</b>  | <b>Allgemeine Anatomie des Bewegungsapparates</b>                          | 12.3.4.2, 12.7.1.5, 12.10.2.2      | 12.4, 12.4.3, 12.4.3.2         | 12.4.2.2, 12.10.1          |
| 2.7.1       | Knochen                                                                    | 12.10.1, 12.7.1.5                  | 12.3.4.2                       | 12.4, 12.10.1.1            |
| 2.7.2       | Knochenverbindungen                                                        | 12.10.1, 12.4                      | 12.2.1.2, 12.10.2.3            | 12.3.4.2, 12.7.1.5         |
| 2.7.3       | Skelettmuskeln                                                             | 12.10.1, 12.7.1.5                  | 12.3.4.2, 12.10.3.1            | 12.4, 12.10.1.1            |
| 2.7.4       | Zusatzeinrichtungen der Muskeln                                            | 12.10.1, 12.7.1.5                  | 12.3.4.2, 12.10.1.2, 12.10.1.3 | 12.4, 12.4.3.4, 12.10.1.1  |
| <b>2.8</b>  | <b>Nervengewebe</b>                                                        | 12.3.4.2, 12.4, 12.7.1.5           | 12.4.4, 12.4.4.1               | 12.5.1, 12.4.4.2, 12.4.4.3 |
| 2.8.1       | Neurone                                                                    | 12.4.4                             | 12.4                           | 12.5.                      |
| 2.8.2       | Gliazellen                                                                 | 12.4.4                             | 12.4                           |                            |
| 2.8.3       | Nervenfasern                                                               | 12.4.4                             | 12.4                           |                            |
| <b>2.9</b>  | <b>Allgemeine Anatomie des Nervensystems</b>                               | 12.4                               | 12.4.4, 12.4.4.3               | 12.4.4.1, 12.4.4.2         |
| 2.9.1       | übergeordnete Gliederungen und allgemeine Begriffe                         | 12.18.2, 12.18.13                  | 12.18.2.1                      | 12.18.2.2                  |
| 2.9.2       | periphere Organisation und Projektion                                      | 12.18.2, 12.18.9.3                 | 12.18.2.1                      | 12.18.2.8, 12.18.2.9       |
| 2.9.3       | Gliederung des peripheren Nervensystems                                    | 12.18.2                            | 12.4.4.1, 12.18.2.1            | 12.4.4.2                   |
| 2.9.4       | mikroskopische Anatomie des peripheren Nervensystems                       | 12.18.2                            |                                |                            |
| <b>2.10</b> | <b>Allgemeine Anatomie des Herz-Kreislaufsystems und Lymphgefäßsystems</b> | 12.8.1.1                           | 12.11.1                        | 12.13.1                    |
| 2.10.1      | Gliederung                                                                 | 12.11.1, 12.11.6.3                 | 12.11.1.2, 12.14.2.9           | 12.11.1.3                  |
| 2.10.2      | Blutgefäße                                                                 | 12.11.1, 12.11.1.4                 | 12.11.6                        | 12.11.1.1                  |
| 2.10.3      | Lymphgefäßsystem                                                           | 12.11.1                            | 12.11.1.1                      |                            |
| <b>2.11</b> | <b>Blut und Knochenmark</b>                                                | 12.12.1.2                          |                                |                            |
| 2.11.1      | Blutzellen                                                                 | 12.12.1, 12.12.1.1                 | 12.12.2                        | 12.12.1                    |
| 2.11.2      | rotes Knochenmark                                                          | 12.12.1                            | 12.12.1.1                      | 12.13.2.1                  |
| <b>2.12</b> | <b>Allgemeine Anatomie des Immunsystems</b>                                | 12.13                              |                                |                            |
| 2.12.1      | allgemeine Aspekte (s. a. GK Physiol. 2.5 und GK Chemie/Bioch. Kap. 24)    | 12.13.1, 12.13.4.1, 12.13.4.4      | 12.13.3, 12.13.4.2             | 12.13.3.2, 12.13.4.3       |
| 2.12.2      | Thymus                                                                     | 12.13.2                            | 12.13.2                        | 12.13.2.1                  |
| 2.12.3      | Milz                                                                       | 12.13.2                            | 12.13.2                        | 12.13.2.2                  |
| 2.12.4      | Lymphknoten                                                                | 12.13.2                            | 12.13.2                        | 12.13.2.2                  |
| 2.12.5      | mukosaassoziiertes lymphatisches Gewebe (MALT)                             | 12.13.2                            | 12.13.2                        | 12.13.2.2                  |
| <b>3</b>    | <b>Obere Extremität</b>                                                    | 12.8.1.6                           | 12.10.2                        |                            |
| <b>3.1</b>  | <b>Grundkenntnisse der Entwicklung</b>                                     | 12.10.1                            |                                |                            |



|            |                                                                  |                   |           |          |
|------------|------------------------------------------------------------------|-------------------|-----------|----------|
| <b>3.2</b> | <b>Knochen</b>                                                   | 12.8.1, 12.10.2.2 | 12.10.1   |          |
| <b>3.3</b> | <b>Gelenke</b>                                                   | 12.10.2.2         |           |          |
| 3.3.1      | Schultergürtel                                                   | 12.10.2           |           |          |
| 3.3.2      | Schultergelenk                                                   | 12.10.2           |           |          |
| 3.3.3      | Ellenbogengelenk                                                 | 12.10.2           |           |          |
| 3.3.4      | Verbindungen der Unterarmknochen                                 | 12.10.2           |           |          |
| 3.3.5      | Handgelenke                                                      | 12.10.2           |           |          |
| 3.3.6      | Fingergelenke                                                    | 12.10.2           |           |          |
| <b>3.4</b> | <b>Muskeln</b>                                                   | 12.8.1.2          | 12.10.2.4 |          |
| 3.4.1      | Schultergürtelmuskeln                                            | 12.10.2           |           |          |
| 3.4.2      | Schultermuskulatur                                               | 12.10.2           |           |          |
| 3.4.3      | Oberarmmuskulatur                                                | 12.10.2           |           |          |
| 3.4.4      | Unterarmmuskulatur                                               | 12.10.2           |           |          |
| 3.4.5      | Handmuskeln                                                      | 12.10.2           |           |          |
| <b>3.5</b> | <b>Nerven</b>                                                    | 12.8.1.2          |           |          |
| 3.5.1      | Plexus brachialis                                                | 12.1.8.2          |           |          |
| <b>3.6</b> | <b>Arterien</b>                                                  | x                 |           |          |
| <b>3.7</b> | <b>Venen</b>                                                     | x                 |           |          |
| <b>3.8</b> | <b>Lymphknoten und Lymphgefäße</b>                               | x                 |           |          |
| <b>3.9</b> | <b>Angewandte und topographische Anatomie</b>                    | 12.8.1.2          | 12.8.2.4  | 12.8.2.5 |
| 3.9.1      | Oberflächenanatomie                                              | 12.8.2            |           |          |
| 3.9.2      | Regio supraclavicularis                                          | 12.8.2            |           |          |
| 3.9.3      | Regio infraclavicularis, deltoidea und scapularis                | 12.8.2            |           |          |
| 3.9.4      | Fossa axillaris (Spatium axillare)                               | 12.8.2            |           |          |
| 3.9.5      | Schulter                                                         | 12.8.2            |           |          |
| 3.9.6      | Oberarm                                                          | 12.8.2            |           |          |
| 3.9.7      | Fossa cubitalis                                                  | 12.8.2            |           |          |
| 3.9.8      | Unterarm                                                         | 12.8.2            |           |          |
| 3.9.9      | Regio carpalis anterior und posterior                            | 12.8.2            |           |          |
| 3.9.10     | Palma manus                                                      | 12.8.2            |           |          |
| 3.9.11     | Dorsum manus                                                     | 12.8.2            |           |          |
| 3.9.12     | Finger                                                           | 12.8.2            |           |          |
| 3.9.13     | Abgrenzung der sensiblen Innervationsgebiete an Hand und Fingern | x                 |           |          |
| 3.9.14     | anatomische Korrelate bildgebender Verfahren                     | x                 |           |          |
| <b>4</b>   | <b>Untere Extremität</b>                                         | 12.8.1.6          | 12.10.2   |          |
| <b>4.1</b> | <b>Grundkenntnisse der Entwicklung</b>                           | 12.10.1           |           |          |
| <b>4.2</b> | <b>Knochen</b>                                                   | 12.8.1, 12.10.2.2 | 12.10.1   |          |
| <b>4.3</b> | <b>Gelenke</b>                                                   | 12.10.2.2         |           |          |
| 4.3.1      | Hüftgelenk                                                       | 12.10.2           |           |          |
| 4.3.2      | Kniegelenk                                                       | 12.10.2           |           |          |
| 4.3.3      | Verbindung der Unterschenkelknochen                              | 12.10.2           |           |          |
| 4.3.4      | Sprunggelenke                                                    | 12.10.2           |           |          |
| 4.3.5      | weitere Gelenke der Fußwurzel und des Mittelfußes                | 12.10.2           |           |          |
| 4.3.6      | Zehengelenke                                                     | 12.10.2           |           |          |
| <b>4.4</b> | <b>Muskeln</b>                                                   | 12.8.1.2          | 12.10.2.4 |          |
| 4.4.1      | Muskeln der Hüfte                                                | 12.10.2           |           |          |
| 4.4.2      | Oberschenkelmuskeln                                              | 12.10.2           |           |          |
| 4.4.3      | Unterschenkelmuskeln                                             | 12.10.2           |           |          |
| 4.4.4      | Fußmuskeln                                                       | 12.10.2           |           |          |
| <b>4.5</b> | <b>Nerven</b>                                                    | 12.8.1.2          |           |          |
| 4.5.1      | Plexus lumbosacralis                                             | 12.18.2           |           |          |
| <b>4.6</b> | <b>Arterien</b>                                                  | x                 |           |          |
| <b>4.7</b> | <b>Venen</b>                                                     | x                 |           |          |
| <b>4.8</b> | <b>Lymphknoten und Lymphgefäße</b>                               | x                 |           |          |
| <b>4.9</b> | <b>Angewandte und topographische Anatomie</b>                    | 12.8.1.2          | 12.8.2.4  | 12.8.2.5 |
| 4.9.1      | Oberflächenanatomie                                              | 12.8.2            |           |          |
| 4.9.2      | Regio inguinalis                                                 | 12.8.2            |           |          |
| 4.9.3      | Trigonum femorale und Fossa iliopectinea                         | 12.8.2            |           |          |
| 4.9.4      | Regio glutealis                                                  | 12.8.2            |           |          |
| 4.9.5      | Hüfte                                                            | 12.8.2            |           |          |
| 4.9.6      | Oberschenkel                                                     | 12.8.2            |           |          |
| 4.9.7      | Fossa poplitea                                                   | 12.8.2            |           |          |
| 4.9.8      | Regio genus                                                      | 12.8.2            |           |          |
| 4.9.9      | Unterschenkel                                                    | 12.8.2            |           |          |
| 4.9.10     | Regio malleolaris                                                | 12.8.2            |           |          |
| 4.9.11     | Fuß                                                              | 12.8.2            |           |          |
| 4.9.12     | Planta pedis                                                     | 12.8.2            |           |          |
| 4.9.13     | anatomische Korrelate bildgebender Verfahren                     | x                 |           |          |
| <b>5</b>   | <b>Kopf und Hals</b>                                             | 12.18             |           |          |
| <b>5.1</b> | <b>Entwicklung und Wachstum</b>                                  |                   |           |          |

|             |                                                |                          |                    |           |
|-------------|------------------------------------------------|--------------------------|--------------------|-----------|
| 5.1.1       | Neurocranium                                   | 12.18.1                  |                    |           |
| 5.1.2       | Viscerocranium                                 | 12.14.1                  | 12.14.1.1          |           |
| 5.1.3       | Hirnnerven, Sinnesorgane                       | 12.18.1                  |                    |           |
| 5.1.4       | Gesicht                                        | x                        |                    |           |
| 5.1.5       | Hals                                           | x                        |                    |           |
| <b>5.2</b>  | <b>Cranium</b>                                 | 12.10.2.2                | 12.18.1            | 12.18.1.1 |
| 5.2.1       | Schädelkalotte                                 | 12.18.1                  |                    |           |
| 5.2.2       | Schädelbasis                                   | 12.18.1                  |                    |           |
| 5.2.3       | Viscerocranium                                 | 12.18.1                  | 12.14.1.1          |           |
| 5.2.4       | Kiefergelenk                                   | 12.8.1                   |                    |           |
| <b>5.3</b>  | <b>Kopf- und Halsmuskeln, Faszien</b>          | 12.8.1.2, 12.10.2        | 12.8.1.3           |           |
| 5.3.1       | mimische Muskulatur                            | 12.9.1                   | 12.9.1.3           |           |
| 5.3.2       | Kaumuskulatur                                  | x                        |                    |           |
| 5.3.3       | Faszien am Kopf und Hals                       | x                        |                    |           |
| 5.3.4       | Zungenbein und Zungenbeinmuskulatur            | 12.8.1                   |                    |           |
| 5.3.5       | Halsmuskulatur                                 | x                        |                    |           |
| <b>5.4</b>  | <b>Kopf- und Halseingeweide</b>                | 12.8.1.4, 12.15.2.1+C344 | 12.14.1            | 12.15.1   |
| 5.4.1       | Nasenhöhle                                     | 12.14.1.1                | 12.14.2.2          | 12.18.5.1 |
| 5.4.2       | Nasennebenhöhlen                               | 12.14.1.1                |                    |           |
| 5.4.3       | Mundhöhle                                      | 12.15.1                  | 12.15.1.1          |           |
| 5.4.4       | Zähne                                          | 12.15.1                  | 12.15.1.1          | 12.15.1.2 |
| 5.4.5       | Zunge                                          | 12.15.1                  | 12.15.1.1          | 12.18.6.1 |
| 5.4.6       | Speicheldrüsen (s. a. GK Physiol. 7.3.2)       | 12.15.1                  | 12.15.1.1          | 12.15.1.3 |
| 5.4.7       | Gaumen                                         | 12.15.1                  | 12.15.1.1          |           |
| 5.4.8       | Isthmus faucium                                | 12.15.1                  | 12.15.1.1          |           |
| 5.4.9       | Pharynx                                        | 12.15.1                  | 12.15.1.1          |           |
| 5.4.10      | Halsteil des Ösophagus                         | 12.15.1                  |                    |           |
| 5.4.11      | Larynx                                         | 12.8.1, 12.14.2.4        | 12.14.1.1          | 12.14.2.3 |
| 5.4.12      | Halsteil der Trachea                           | 12.14.1                  | 12.14.1.1          |           |
| 5.4.13      | Schilddrüse                                    | 12.5.1.1                 |                    |           |
| 5.4.14      | Epithelkörperchen                              | 12.5.1.1                 |                    |           |
| 5.4.15      | Glomus caroticum                               | 12.18.13.2               |                    |           |
| <b>5.5</b>  | <b>Hirnnerven</b>                              | 12.18.2.6                |                    |           |
| 5.5.1       | Sensorische Nerven                             | 12.18.2                  | 12.18.5.1          |           |
| 5.5.2       | Augenmuskelnerven                              | 12.18.2                  |                    |           |
| 5.5.3       | N. trigeminus                                  | 12.18.2                  |                    |           |
| 5.5.4       | N. facialis                                    | 12.18.2                  |                    |           |
| 5.5.5       | N. glossopharyngeus                            | 12.18.2                  |                    |           |
| 5.5.6       | N. vagus                                       | 12.18.2                  |                    |           |
| 5.5.7       | N. accessorius                                 | 12.18.2                  |                    |           |
| 5.5.8       | N. hypoglossus                                 | 12.18.2                  |                    |           |
| <b>5.6</b>  | <b>Zervikale Spinalnerven</b>                  |                          |                    |           |
| 5.6.1       | Rr. dorsales                                   | 12.18.2                  |                    |           |
| 5.6.2       | Rr. ventrales                                  | 12.18.2                  |                    |           |
| <b>5.7</b>  | <b>Vegetative Innervation am Kopf und Hals</b> | 12.18.2.7                |                    |           |
| 5.7.1       | Pars sympathica                                | 12.18.2                  |                    |           |
| 5.7.2       | Pars parasymphathica                           | 12.18.2                  |                    |           |
| <b>5.8</b>  | <b>Arterien und Venen</b>                      |                          |                    |           |
| 5.8.1       | A. subclavia (s.a. 3.6 und 7.6.1)              | 12.18.1                  |                    |           |
| 5.8.2       | A. carotis communis                            | 12.18.1                  |                    |           |
| 5.8.3       | A. carotis interna                             | 12.18.1                  |                    |           |
| 5.8.4       | A. carotis externa                             | 12.18.1                  |                    |           |
| 5.8.5       | V. jugularis interna                           | 12.18.1                  |                    |           |
| 5.8.6       | Angulus venosus                                | 12.18.1                  |                    |           |
| <b>5.9</b>  | <b>Lymphknoten und Lymphgefäße</b>             |                          |                    |           |
| 5.9.1       | Lymphknoten an der Kopf-Hals-Grenze            | x                        |                    |           |
| 5.9.2       | Oberflächliche und tiefe Halslymph- knoten     | x                        |                    |           |
| 5.9.3       | Lymphbahnen                                    | x                        |                    |           |
| <b>5.10</b> | <b>Angewandte und topographische Anatomie</b>  | 12.5.1.1, 12.8.2.4       | 12.8.1.2, 12.8.2.5 | 12.8.1.3  |
| 5.10.1      | Oberflächenanatomie von Kopf und Hals          | 12.8.1                   |                    |           |
| 5.10.2      | Kopfreionen                                    | 12.8.1                   |                    |           |
| 5.10.3      | oberflächliche Gesichtsregionen                | 12.8.1                   |                    | 12.18.3.1 |
| 5.10.4      | tiefe Gesichtsregionen                         | 12.8.1                   |                    | 12.18.3.1 |
| 5.10.5      | Spatium peripharyngeum                         | 12.8.1                   |                    |           |
| 5.10.6      | Mundboden                                      | 12.8.1                   |                    |           |
| 5.10.7      | anatomische Korrelate bildgebender Verfahren   | 12.8.1                   |                    |           |
| 5.10.8      | Halsregionen                                   | 12.8.1                   |                    |           |
| <b>6</b>    | <b>Leibeswand</b>                              | 12.8.1.2, 12.10.2        | 12.8.1.5           |           |
| <b>6.1</b>  | <b>Rücken</b>                                  | 12.10.2.4                |                    |           |
| 6.1.1       | Entwicklung der Wirbelsäule                    | 12.8.2                   | 12.10.2.4          |           |
| 6.1.2       | Skelettelemente der Wirbelsäule                | 12.10.2                  | 12.10.2.4          |           |

|            |                                                                  |                    |                    |           |
|------------|------------------------------------------------------------------|--------------------|--------------------|-----------|
| 6.1.3      | Verbindungen der Wirbel                                          | 12.10.2            | 12.10.2.4          |           |
| 6.1.4      | Wirbelsäule als Ganzes                                           | 12.10.2            | 12.10.2.4          |           |
| 6.1.5      | Autochthone Rückenmuskulatur                                     | 12.8.1             | 12.10.2.4          |           |
| 6.1.6      | Nerven und Gefäße                                                | 12.8.1             | 12.10.2.4          |           |
| 6.1.7      | angewandte und topographische Anatomie                           | 12.8.1             | 12.10.2.4          | 12.18.1.3 |
| <b>6.2</b> | <b>Brustwand</b>                                                 | 12.10.2.4          |                    |           |
| 6.2.1      | Grundzüge der Entwicklung des Thorax                             | 12.10.2.4          |                    |           |
| 6.2.2      | Skelettelemente und Verbindungen                                 | 12.10.2            | 12.10.2.4          |           |
| 6.2.3      | Thorax als Ganzes                                                | 12.8.1             | 12.10.2.4          |           |
| 6.2.4      | Interkostalmuskulatur                                            | 12.8.1             | 12.10.2.4          |           |
| 6.2.5      | Zwerchfell                                                       | 12.8.1             | 12.10.2.4          |           |
| 6.2.6      | Nerven und Gefäße                                                | 12.8.1             | 12.10.2.4          |           |
| 6.2.7      | Mamma                                                            | 12.10.2.4          |                    |           |
| <b>6.3</b> | <b>Bauchwand</b>                                                 | 12.10.2.4          |                    |           |
| 6.3.1      | Grundzüge der Entwicklung und Nabelbildung                       | x                  |                    |           |
| 6.3.2      | Muskulatur                                                       | 12.8.1             |                    |           |
| 6.3.3      | Nerven und Gefäße der Bauchwand                                  | 12.8.1             |                    |           |
| <b>6.4</b> | <b>Becken, Beckenwände</b>                                       |                    |                    |           |
| 6.4.1      | Skelettelemente und Verbindungen                                 | 12.8.1             | 12.10.2            |           |
| 6.4.2      | Becken als Ganzes                                                | 12.8.1             |                    |           |
| 6.4.3      | innere Beckenmuskulatur                                          | 12.8.1             |                    |           |
| 6.4.4      | Beckenbodenmuskulatur                                            | 12.8.1             | 12.15.1.6          | 12.17.1.3 |
| 6.4.5      | Nerven und Gefäße                                                | 12.8.1             |                    |           |
| <b>7</b>   | <b>Brusteingeweide</b>                                           | 12.8.1.7           | 12.8.3.1           |           |
| <b>7.1</b> | <b>Entwicklung von Pleurahöhlen, Herz und Lunge</b>              | 12.8.2.2           |                    |           |
| 7.1.1      | Pleurahöhlen und Zwerchfell                                      | 12.14.1            | 12.3.3             |           |
| 7.1.2      | Herz                                                             | 12.3.3             |                    |           |
| 7.1.3      | Schlundbogenarterien                                             | 12.7.1             |                    |           |
| 7.1.4      | fetaler Kreislauf                                                | 12.11.6            |                    |           |
| 7.1.5      | Trachea und Lunge                                                | 12.14.1            | 12.3.3             |           |
| <b>7.2</b> | <b>Atmungsorgane</b>                                             | 12.14              | 12.14.1            | 12.14.1.2 |
| 7.2.1      | Trachea                                                          | 12.14.1            |                    |           |
| 7.2.2      | Lungen                                                           | 12.14.1            | 12.14.2.1          |           |
| 7.2.3      | Pleura                                                           | 12.14.1            |                    |           |
| <b>7.3</b> | <b>Ösophagus</b>                                                 | 12.15.1            |                    |           |
| <b>7.4</b> | <b>Thymus</b>                                                    | 12.13.2            |                    |           |
| <b>7.5</b> | <b>Herz</b>                                                      |                    |                    |           |
| 7.5.1      | Gestalt, Bau, Lage                                               | 12.11.2            | 12.11.2            | 12.11.2.3 |
| 7.5.2      | Erregungsbildungs- und -leitungssystem (s. a. GK Physiol. 3.1.2) | 12.11.3, 12.11.2.4 | 12.5.4, 12.11.3    | 12.5.4.1  |
| 7.5.3      | Gefäße                                                           | 12.11.4            | 12.11.2.2          |           |
| 7.5.4      | Nerven                                                           | 12.11.5            |                    |           |
| 7.5.5      | Herzbeutel                                                       | 12.11.2            | 12.11.2.1          |           |
| <b>7.6</b> | <b>Arterien, Venen und Lymphgefäße des Thorax</b>                |                    |                    |           |
| 7.6.1      | Aorta im Thorax                                                  | 12.11.4            |                    |           |
| 7.6.2      | V. cava superior und inferior                                    | 12.11.4            |                    |           |
| 7.6.3      | Pulmonal- und Bronchialgefäße                                    | 12.11.4            |                    |           |
| 7.6.4      | Lymphknoten und Lymphgefäße                                      | 12.11.4            |                    |           |
| <b>7.7</b> | <b>Nerven</b>                                                    | 12.18.2.7          |                    |           |
| <b>7.8</b> | <b>Angewandte und topographische Anatomie</b>                    | 12.8.2.4           | 12.8.2.5           |           |
| 7.8.1      | Oberflächenanatomie                                              | 12.8.1             |                    |           |
| 7.8.2      | Projektion der Thoraxorgane auf die Thoraxwand (Skeletotopik)    | 12.8.1             |                    |           |
| 7.8.3      | Gliederung der Thoraxhöhle und Topographie der Thoraxorgane      | 12.8.1             |                    |           |
| 7.8.4      | Atemmechanik (s.a. GK Physiol.5.4)                               | 12.14.3            | 12.14.2.5          |           |
| <b>8</b>   | <b>Bauch- und Beckeneingeweide</b>                               | 12.8.1.7           | 12.8.3.1           |           |
| <b>8.1</b> | <b>Entwicklung von Darmtrakt, Harn- und Sexualorganen</b>        | 12.8.2.2           |                    |           |
| 8.1.1      | Verdauungsorgane                                                 | 12.3.3             |                    |           |
| 8.1.2      | Organe im Retroperitonealraum                                    | 12.3.3             | 12.16.1.1          | 12.17.1   |
| 8.1.3      | Geschlechtsorgane                                                | 12.3.3, 12.17.1.2  | 12.16.1.1          | 12.17.1   |
| <b>8.2</b> | <b>Organe des Magen-Darm-Kanals</b>                              | 12.15, 12.15.1.5   | 12.15.1, 12.18.9.3 | 12.15.1.4 |
| 8.2.1      | Magen                                                            | 12.15.1            |                    |           |
| 8.2.2      | Dünndarm                                                         | 12.15.1            |                    |           |
| 8.2.3      | Colon                                                            | 12.15.1            |                    |           |
| 8.2.4      | Appendix vermiformis                                             | 12.15.1            |                    |           |
| 8.2.5      | Rectum                                                           | 12.15.1            |                    |           |
| <b>8.3</b> | <b>Leber, Gallenblase, Pankreas</b>                              | 12.15.1            | 12.15.1.4          | 12.18.9.3 |
| 8.3.1      | Leber                                                            | 12.15.1            | 12.15.3.1          |           |
| 8.3.2      | Gallenblase                                                      | 12.15.1            |                    |           |
| 8.3.3      | extrahepatische Gallenwege                                       | 12.15.1            |                    |           |

|             |                                                            |                    |                     |            |
|-------------|------------------------------------------------------------|--------------------|---------------------|------------|
| 8.3.4       | Pankreas                                                   | 12.15.1            |                     |            |
| <b>8.4</b>  | <b>Milz</b>                                                | 12.15.1            | 12.13.2.2           |            |
| <b>8.5</b>  | <b>Endokrine Organe</b>                                    | 12.5.1.1           | 12.5.1.2            |            |
| 8.5.1       | Nebenniere und Paraganglien                                | 12.5.1             |                     |            |
| 8.5.2       | Inselorgan (endokrines Pankreas)                           | 12.15.1            | 12.5.1              |            |
| 8.5.3       | Gastroenteropancreatico- endokrines System                 | 12.5.1             |                     |            |
| <b>8.6</b>  | <b>Harnorgane</b>                                          | 12.16, 12.16.3     | 12.16.1             | 12.16.1.1  |
| 8.6.1       | Niere                                                      | 12.16.1            | 12.16.3.2           | 12.16.3.3  |
| 8.6.2       | Nierenbecken                                               | 12.16.1            |                     |            |
| 8.6.3       | Harnleiter                                                 | 12.16.1            |                     |            |
| 8.6.4       | Harnblase                                                  | 12.16.1            | 12.16.3.4           |            |
| 8.6.5       | weibliche Harnröhre                                        | 12.16.1            |                     |            |
| <b>8.7</b>  | <b>Weibliche Geschlechtsorgane</b>                         | 12.17              | 12.17.1             |            |
| 8.7.1       | Ovar                                                       | 12.17.1            | 12.5.1.1            | 12.17.2.1  |
| 8.7.2       | Tube                                                       | 12.17.1            |                     |            |
| 8.7.3       | Uterus                                                     | 12.17.1            | 12.17.3             |            |
| 8.7.4       | Vagina                                                     | 12.17.1            |                     |            |
| 8.7.5       | äußere Genitalien                                          | 12.17.1            |                     |            |
| <b>8.8</b>  | <b>Männliche Geschlechtsorgane</b>                         | 12.17              | 12.17.1             |            |
| 8.8.1       | Hoden                                                      | 12.17.1            | 12.5.1.1            | 12.17.2.1  |
| 8.8.2       | Nebenhoden                                                 | 12.17.1            |                     |            |
| 8.8.3       | Samenstrang                                                | 12.17.1            |                     |            |
| 8.8.4       | Glandula vesiculosa (Samenblase)                           | 12.17.1            |                     |            |
| 8.8.5       | Prostata                                                   | 12.17.1            |                     |            |
| 8.8.6       | äußere Geschlechtsorgane                                   | 12.17.1            | 12.17.2.5           |            |
| 8.8.7       | Ejakulat                                                   | 12.17.1            | 12.17.2.2           |            |
| <b>8.9</b>  | <b>Arterien</b>                                            |                    |                     |            |
| 8.9.1       | Pars abdominalis aortae                                    | 12.11.1            |                     |            |
| 8.9.2       | Truncus coeliacus                                          | 12.11.1            |                     |            |
| 8.9.3       | A. mesenterica superior                                    | 12.11.1            |                     |            |
| 8.9.4       | A. mesenterica inferior                                    | 12.11.1            |                     |            |
| 8.9.5       | paarige laterale Äste                                      | 12.11.1            |                     |            |
| 8.9.6       | Bifurcatio aortae, Aa. iliaca comm.                        | 12.11.1            |                     |            |
| 8.9.7       | A. iliaca externa                                          | 12.11.1            |                     |            |
| 8.9.8       | A. iliaca interna                                          | 12.11.1            |                     |            |
| <b>8.10</b> | <b>Venen</b>                                               |                    |                     |            |
| 8.10.1      | V. cava inferior                                           | 12.11.1            |                     |            |
| 8.10.2      | Vv. iliaca communis, externa, interna                      | 12.11.1            |                     |            |
| 8.10.3      | V. portae hepatis                                          | 12.11.1            |                     |            |
| <b>8.11</b> | <b>Lymphgefäße und Lymphknoten</b>                         | 12.11.1            |                     |            |
| <b>8.12</b> | <b>Vegetatives Nervensystem</b>                            | 12.15.2.7          | 12.18.2.7           |            |
| 8.12.1      | Pars sympathica                                            | 12.18.2            |                     |            |
| 8.12.2      | Pars parasympathica                                        | 12.18.2            |                     |            |
| <b>8.13</b> | <b>Peritoneum</b>                                          | 12.8.1.8           | 12.15.1.4           |            |
| 8.13.1      | Peritonealstrukturen                                       | 12.8.1             |                     |            |
| <b>8.14</b> | <b>Angewandte und topographische Anatomie</b>              | 12.5.1.1, 12.8.2.5 | 12.8.1.8, 12.8.2.4  | 12.8.2.2   |
| 8.14.1      | Oberflächenanatomie, Abdomen                               | 12.8.1             | 12.8.2              | 12.18.9.3  |
| 8.14.2      | Organprojektionen auf die Bauchwand, Tastbarkeit           | 12.8.1             | 12.8.2              |            |
| 8.14.3      | anatomische Korrelate bildgebender Verfahren               | x                  |                     |            |
| 8.14.4      | Gliederung der Bauchhöhle, Topographie der Bauchorgane     | 12.8.1             | 12.8.2              | 12.15.1.4  |
| 8.14.5      | Gliederung des Cavum pelvis, Topographie der Beckenorgane  | 12.8.1             | 12.8.2              | 12.17.1.3  |
| 8.14.6      | Regio perinealis                                           | 12.8.1             | 12.8.2              |            |
| 8.14.7      | Intraabdominaldruck                                        | 12.8.1             | 12.8.2              | 12.15.1.6  |
| 8.14.8      | Schwangerschaft, Geburtsvorgang                            | 12.17.3            | 12.17.1.3           | 12.17.3    |
| <b>9</b>    | <b>Zentralnervensystem</b>                                 | 12.8.2.4, 12.18.2  | 12.8.2.5, 12.18.2.2 | 12.18      |
| <b>9.1</b>  | <b>Entwicklung</b>                                         |                    |                     |            |
| 9.1.1       | Ausgangsmaterial                                           | 12.4.4             |                     |            |
| 9.1.2       | Rückenmark                                                 | 12.4.4             |                     |            |
| 9.1.3       | Gehirn (Encephalon)                                        | 12.4.4             |                     |            |
| 9.1.4       | angeborene Fehlbildungen                                   | 12.4.4             |                     |            |
| <b>9.2</b>  | <b>Rückenmark</b>                                          |                    |                     |            |
| 9.2.1       | Gestalt, Gliederung, Lage                                  | 12.18.2            |                     |            |
| 9.2.2       | graue Substanz                                             | 12.18.2            |                     |            |
| 9.2.3       | weiße Substanz                                             | 12.18.2            |                     |            |
| 9.2.4       | funktionelle Anatomie                                      | 12.18.2            | 12.18.11            | 12.18.11.1 |
| <b>9.3</b>  | <b>Rhombencephalon</b>                                     |                    |                     |            |
| 9.3.1       | Gestalt, Gliederung, Lage                                  | 12.18.2            |                     |            |
| 9.3.2       | innere Gliederung                                          | 12.18.2            | 12.18.13.1          |            |
| 9.3.3       | funktionelle Anatomie (s. a. GK Physiol. 14.3.3 und 4.2.2) | 12.18.2            | 12.15.2.1           | 12.18.2.6  |

|             |                                                       |                                      |                                             |                                          |
|-------------|-------------------------------------------------------|--------------------------------------|---------------------------------------------|------------------------------------------|
| <b>9.4</b>  | <b>Mesencephalon</b>                                  |                                      |                                             |                                          |
| 9.4.1       | Gestalt, Gliederung, Lage                             | 12.18.2                              |                                             |                                          |
| 9.4.2       | innere Gliederung                                     | 12.18.2                              |                                             |                                          |
| 9.4.3       | funktionelle Anatomie                                 | 12.18.2, 12.18.9.2                   | 12.18.2.6                                   | 12.18.9                                  |
| <b>9.5</b>  | <b>Cerebellum</b>                                     |                                      |                                             |                                          |
| 9.5.1       | Gestalt, Gliederung                                   | 12.18.2                              |                                             |                                          |
| 9.5.2       | innere Gliederung                                     | 12.18.2                              |                                             |                                          |
| 9.5.3       | Kleinhirnbahnen                                       | 12.18.2                              |                                             |                                          |
| <b>9.6</b>  | <b>Diencephalon</b>                                   | 12.5.1.3                             |                                             |                                          |
| 9.6.1       | Gestalt, innere und äußere Oberfläche                 | 12.18.2                              |                                             |                                          |
| 9.6.2       | Grundlagen der inneren und funktionellen Gliederung   | 12.18.2                              |                                             |                                          |
| <b>9.7</b>  | <b>Telencephalon</b>                                  |                                      |                                             |                                          |
| 9.7.1       | Gestalt, Gliederung                                   | 12.18.2                              | 12.18.5.1                                   |                                          |
| 9.7.2       | Kerne des Telencephalon                               | 12.18.2                              |                                             |                                          |
| 9.7.3       | Großhirnrinde                                         | 12.18.2                              | 12.18.10                                    | 12.18.10.1                               |
| 9.7.4       | Bahnen der Großhirnrinde                              | 12.18.2                              |                                             |                                          |
| <b>9.8</b>  | <b>Systeme</b>                                        | 12.18.2.4                            |                                             |                                          |
| 9.8.1       | afferente Systeme, neuronale Gliederung, Umschaltorte | 12.18.2, 12.18.5, 12.18.6.2, 12.18.9 | 12.18.3.7, 12.18.5.2, 12.18.7.2, 12.18.10.2 | 12.18.4.6, 12.18.6, 12.18.8.2, 12.18.9.2 |
| 9.8.2       | efferente Systeme, neuronale Gliederung, Umschaltorte | 12.18.2                              | 12.18.12                                    | 12.18.12.1                               |
| 9.8.3       | limbisches System                                     | 12.18.2                              | 12.19.3                                     | 12.19.3.2                                |
| <b>9.9</b>  | <b>Innere Liquorräume</b>                             | 12.18.1.4                            |                                             |                                          |
| 9.9.1       | Seitenventrikel: Gestalt, Gliederung, Lage            | 12.18.1                              |                                             |                                          |
| 9.9.2       | III. Ventrikel: Gestalt, Gliederung, Lage             | 12.18.1                              |                                             |                                          |
| 9.9.3       | IV. Ventrikel: Gestalt, Gliederung, Lage              | 12.18.1                              |                                             |                                          |
| 9.9.4       | Plexus choroideus                                     | 12.18.1                              |                                             |                                          |
| <b>9.10</b> | <b>Hirn- und Rückenmarkshäute, äußere Liquorräume</b> | 12.18.1.2                            |                                             |                                          |
| 9.10.1      | Dura mater spinalis et encephali                      | 12.18.1                              | 12.18.1.3                                   |                                          |
| 9.10.2      | Arachnoidea mater, Pia mater                          | 12.18.1                              | 12.18.1.3                                   | 12.18.1.4                                |
| <b>9.11</b> | <b>Gefäßversorgung</b>                                | 12.5.1.1                             |                                             |                                          |
| 9.11.1      | Arterien                                              | 12.18.1                              | 12.18.1.6                                   |                                          |
| 9.11.2      | Mikrozirkulation                                      | 12.18.1                              |                                             |                                          |
| 9.11.3      | venöse Abflusswege                                    | 12.18.1                              | 12.18.1.5                                   |                                          |
| <b>9.12</b> | <b>Angewandte und topographische Anatomie</b>         | 12.18.1                              | 12.18.1.7                                   |                                          |
| <b>10</b>   | <b>Sehorgan</b>                                       | 12.18                                | 12.18.3                                     | 12.18.3.1                                |
| <b>10.1</b> | <b>Entwicklung</b>                                    | x                                    |                                             |                                          |
| <b>10.2</b> | <b>Orbita</b>                                         | 12.8.2.4                             | 12.8.2.5                                    |                                          |
| 10.2.1      | Form, Lage                                            | 12.18.3                              |                                             |                                          |
| 10.2.2      | Peri- und retrobulbärer Bindegewebsraum               | 12.18.3                              |                                             |                                          |
| <b>10.3</b> | <b>Bulbus oculi</b>                                   | 12.18.3.2                            |                                             |                                          |
| 10.3.1      | Gestalt, Gliederung, Form, mikroskopische Anatomie    | 12.18.3                              | 12.18.3.6                                   |                                          |
| 10.3.2      | Tunica fibrosa                                        | 12.18.3                              |                                             |                                          |
| 10.3.3      | Tunica vasculosa                                      | 12.18.3                              | 12.18.3.3                                   |                                          |
| 10.3.4      | Tunica interna                                        | 12.18.3                              |                                             |                                          |
| 10.3.5      | N. opticus                                            | 12.18.3                              |                                             |                                          |
| 10.3.6      | Bewegungsapparat des Bulbus oculi                     | 12.18.3                              | 12.18.3.3                                   |                                          |
| <b>10.4</b> | <b>Zusätzliche Einrichtungen</b>                      | 12.8.2.5                             |                                             |                                          |
| 10.4.1      | Augenlid                                              | 12.18.3                              | 12.18.3.3                                   |                                          |
| 10.4.2      | Bindehaut                                             | 12.18.3                              |                                             |                                          |
| 10.4.3      | Tränendrüse, Tränenwege                               | 12.18.3                              | 12.18.3.4                                   |                                          |
| <b>11</b>   | <b>Hör- und Gleichgewichtsorgan</b>                   | 12.18                                | 12.18.4                                     |                                          |
| <b>11.1</b> | <b>Entwicklung des Hör- und Gleichgewichtsorgans</b>  | x                                    |                                             |                                          |
| <b>11.2</b> | <b>Äußeres Ohr</b>                                    | 12.8.2.4                             | 12.8.2.5                                    | 12.18.4.1                                |
| 11.2.1      | Ohrmuschel, äußerer Gehörgang                         | 12.18.4                              | 12.8.2.5                                    | 12.18.4.1                                |
| <b>11.3</b> | <b>Mittelohr</b>                                      | 12.8.2.5                             | 12.18.4.1                                   | 12.18.4.2                                |
| 11.3.1      | Paukenhöhle                                           | 12.18.4                              | 12.8.2.5                                    | 12.18.4.1                                |
| 11.3.2      | Gehörknöchelchen                                      | 12.18.4                              | 12.8.2.5                                    | 12.18.4.1                                |
| <b>11.4</b> | <b>Innenohr</b>                                       | 12.8.2.4                             | 12.8.2.5                                    | 12.18.4.1                                |
| 11.4.1      | Labyrinth                                             | 12.18.4                              | 12.18.4.5                                   |                                          |
| 11.4.2      | Gleichgewichtsorgan                                   | 12.18.8                              | 12.18.8                                     | 12.18.8.1                                |
| <b>12</b>   | <b>Haut und Hautanhangsgebilde</b>                    | 12.9                                 |                                             |                                          |
| <b>12.1</b> | <b>Haut und Unterhaut</b>                             | 12.9.1.1                             |                                             |                                          |
| 12.1.1      | Epidermis                                             | 12.9.1                               | 12.9.1.1                                    |                                          |
| 12.1.2      | Dermis                                                | 12.9.1                               | 12.9.1.1                                    |                                          |
| 12.1.3      | Subcutis                                              | 12.9.1                               | 12.9.1.1                                    |                                          |
| 12.1.4      | Sinnesfunktion der Haut                               | 12.18.7, 12.18.7                     | 12.9.1, 12.18.7.1                           | 12.9.1.1, 12.18.9.1                      |

|             |                   |        |          |  |
|-------------|-------------------|--------|----------|--|
| <b>12.2</b> | <b>Behaarung</b>  | 12.9.1 | 12.9.1.1 |  |
| <b>12.3</b> | <b>Nägel</b>      | 12.9.1 | 12.9.1.1 |  |
| <b>12.4</b> | <b>Hautdrüsen</b> | 12.9.1 | 12.9.1.1 |  |

### 3.5. Physiologie

| GK Physiologie                                        |                                                                            | Synonym                                                                                   | Abgleich mit NKLM          |                      |                      |
|-------------------------------------------------------|----------------------------------------------------------------------------|-------------------------------------------------------------------------------------------|----------------------------|----------------------|----------------------|
| <b>1 Allgemeine und Zellphysiologie, Zellerregung</b> |                                                                            |                                                                                           | 12.3.1.2                   |                      |                      |
| 1.1                                                   | Stoffmenge und Konzentration (s. a. GK Physik 2.5)                         | Prozesse des Verhaltens und Erlebens                                                      | 12.2.6.2                   | 12.3.1.2             |                      |
| 1.2                                                   | Osmose (s. a. GK Physik 4.6)                                               | Aufbau, Eigenschaft und Funktion von biologischen Membranen                               | 12.3.1.2                   | 12.3.2.3             |                      |
| 1.3                                                   | Stofftransport                                                             | aktiver und passiver Substanztransport über Membran                                       | 12.3.2.1, 12.5.2, 12.5.2.3 | 12.4.1.5, 12.5.2.1   | 12.5.2, 12.5.2.2     |
| 1.3.1                                                 | in und von Gasen und Flüssigkeiten                                         | Aufbau, Eigenschaft und Funktion von biologischen Membranen                               | 12.3.1.2                   |                      |                      |
| 1.3.2                                                 | durch Membranen (s. a. GK Anatomie 2.3.2 und GK Chemie/Bioch. 20.2.3)      | membran                                                                                   | 12.2.2                     | 12.3.1.2             |                      |
| 1.3.3                                                 | intrazellulär                                                              | Aufbau, Eigenschaft und Funktion von biologischen Membranen                               | 12.3.1.2                   |                      |                      |
| 1.3.4                                                 | über Zellverbände (s. a. GK Biol. 1.2.6 und GK Anat. 2.3, 2.6.2 und 2.6.3) | interzellulär                                                                             | 12.5                       | 12.3.1.2             |                      |
| 1.4                                                   | Zellorganisation und -beweglichkeit                                        | Aufbau, Eigenschaft und Funktion von biologischen Membranen                               | 12.3.1.2, 12.3.5.2         | 12.3.2.4             | 12.3.5.3             |
| 1.5                                                   | Elektrische Phänomene an Zellen                                            | Grundlagen der Elektrizität; Reaktionstypen bei Säuren, Basen, Salzen und Metallkomplexen | 12.2.1.5, 12.2.2.6         | 12.3.1.2             | 12.3.2.2             |
| 1.5.1                                                 | Grundphänomene und -funktionier                                            |                                                                                           | 12.5.4                     |                      |                      |
| 1.5.2                                                 | Funktion erregbarer Zeller                                                 |                                                                                           | 12.5.4                     |                      |                      |
| 1.6                                                   | Energetik (s. GK Physik 2.4 und GK Chemie/Bioch. Kap. 14)                  |                                                                                           | 12.5.4                     | 12.3.1.2             |                      |
| <b>2 Blut und Immunsystem</b>                         |                                                                            |                                                                                           | 12.12.1                    |                      |                      |
| 2.1                                                   | Blut                                                                       |                                                                                           | 12.12                      | 12.12.1.1            |                      |
| 2.2                                                   | Erythrozyten                                                               | Blutzellen                                                                                | 12.12.1                    | 12.12.1.1            |                      |
| 2.3                                                   | Blutplasma                                                                 |                                                                                           | 12.12.1                    | 12.12.1.1            | 12.12.1.3            |
| 2.3.1                                                 | Transportfunktion                                                          |                                                                                           | 12.12.1                    |                      |                      |
| 2.3.2                                                 | niedermolekulare Bestandteile                                              |                                                                                           | 12.12.1                    |                      |                      |
| 2.3.3                                                 | Plasmaproteine                                                             |                                                                                           | 12.12.1                    |                      |                      |
| 2.4                                                   | Hämostase und Fibrinolyse                                                  | Gerinnung                                                                                 | 12.12.2                    | 12.12.2.3            |                      |
| 2.4.1                                                 | Thrombozyten                                                               |                                                                                           | 12.12.2                    | 16.5.59              |                      |
| 2.4.2                                                 | Hämostase                                                                  |                                                                                           | 12.12.2                    |                      |                      |
| 2.4.3                                                 | Fibrinolyse                                                                |                                                                                           | 12.12.2                    |                      |                      |
| 2.5                                                   | Abwehrsystem und zelluläre Identität (Immunologie)                         |                                                                                           | 12.13, 12.13.3.1           | 12.13.1.1, 12.13.3.2 | 12.13.1.2, 12.13.4.1 |
| 2.5.1                                                 | Leukozyten                                                                 | immunsystem                                                                               | 12.13                      |                      |                      |
| 2.5.2                                                 | unspezifische Abwehr                                                       | angeborenes Immunsystem                                                                   | 12.13                      | 12.13.3              |                      |
| 2.5.3                                                 | spezifische Abwehr                                                         | Adaptives Immunsystem                                                                     | 12.13                      | 12.13.4              |                      |
| 2.5.4                                                 | Entzündungsreaktionier                                                     |                                                                                           | 12.13                      | 13.2.2               |                      |
| 2.5.5                                                 | Blutgruppen                                                                |                                                                                           | 12.13                      | 15.2                 |                      |
| <b>3 Herz</b>                                         |                                                                            |                                                                                           |                            |                      |                      |
| 3.1                                                   | Elektrophysiologie des Herzens                                             | elektro                                                                                   | 12.11.3, 12.11.3.2         | 12.11.3, 12.11.3.3   | 12.11.3.1, 12.11.3.4 |
| 3.1.1                                                 | spezielle Elektrophysiologie des Myokards                                  |                                                                                           | 12.11.3                    |                      |                      |
| 3.1.2                                                 | Erregungsbildungs- und -leitungssystem (s. a. GK Anat. 7.5.2)              |                                                                                           | 12.11.3                    | 12.5.4               | 12.5.4.2             |
| 3.1.3                                                 | elektromechanische Koppelung (s. a. GK Anat. 2.6.2)                        |                                                                                           | 12.11.3                    |                      |                      |
| 3.1.4                                                 | Elektrokardiographie (EKG)                                                 | Grundlagen der Elektrizitätslehre                                                         | 12.2.1.5, 12.11.3          | 14b.3                |                      |
| 3.2                                                   | Mechanik des Herzens                                                       |                                                                                           | 12.11                      | 12.11.4              | 12.11.4.1, 12.11.4.2 |
| 3.2.1                                                 | Grundlagen der Muskelkontraktion (s. a. 13.1)                              |                                                                                           | 12.11.4                    |                      |                      |
| 3.2.2                                                 | Herzklappen (s. a. GK Anat. 7.5.1)                                         |                                                                                           | 12.11.2                    |                      |                      |
| 3.2.3                                                 | Herzzyklus                                                                 |                                                                                           | 12.11.4                    |                      |                      |
| 3.2.4                                                 | Füllung des Herzens                                                        |                                                                                           | 12.11.2                    |                      |                      |
| 3.3                                                   | Energiestoffwechsel des Herzens                                            |                                                                                           | 12.11.5.3                  |                      |                      |
| 3.3.1                                                 | Koronardurchblutung                                                        | herzkranzgefäße                                                                           | 12.11.2                    | 12.11.6.5            | 12.11.6.6            |
| 3.3.2                                                 | Energieumsatz                                                              |                                                                                           | x                          |                      |                      |
| 3.4                                                   | Steuerung der Herzrätigkeit                                                |                                                                                           | 12.11.3                    | 12.11.5, 12.11.5.1   | 12.11.5.2            |
| 3.4.1                                                 | Grundmechanismen                                                           |                                                                                           | 12.11.4                    | 12.11.3              |                      |
| 3.4.2                                                 | Herzrerven                                                                 | erregungsleitung                                                                          | 12.11.2                    | 12.18.9.1            |                      |
| 3.4.3                                                 | funktionsabhangige Anpassung                                              | hypertrophie                                                                              | 13.2.1, 12.19.10.2         | 12.18.11.2           | 12.19.6.7            |
| <b>4 Blutkreislauf</b>                                |                                                                            |                                                                                           |                            |                      |                      |
| 4.1                                                   | Allgemeine Grundlagen                                                      |                                                                                           | 12.11.6, 12.11.6.8         | 12.11.6.1            | 12.11.6.7            |
| 4.1.1                                                 |                                                                            | Grundlagen der Stromungslehre                                                            | 12.2.1.8, 12.11.6          |                      |                      |
| 4.1.2                                                 | funktionelle Abschnitte                                                    |                                                                                           | 12.11.6                    |                      |                      |

|             |                                                                                      |                                                              |                                    |                     |                      |
|-------------|--------------------------------------------------------------------------------------|--------------------------------------------------------------|------------------------------------|---------------------|----------------------|
| 4.1.3       | Druck                                                                                |                                                              | 12.11.6                            | 12.11.6.4           |                      |
| 4.1.4       | Strömung                                                                             |                                                              | 12.11.6                            | 12.11.6.5           |                      |
| 4.1.5       | Strömungswiderstand                                                                  |                                                              | 12.11.6                            | 12.11.6.5           |                      |
| 4.1.6       | Blutvolumen (s. a. 1.3.4 und 2.1)                                                    |                                                              | 12.11.6                            |                     |                      |
| 4.1.7       | Stoffaustausch (s. a. 1.3.4)                                                         |                                                              | 12.11.6                            | 12.11.6.9           | 12.11.6.10           |
| <b>4.2</b>  | <b>Hochdrucksystem</b>                                                               |                                                              |                                    |                     |                      |
| 4.2.1       | arterieller Blutdruck                                                                |                                                              | 12.11.6                            | 12.11.1             | 12.11.6.4            |
| 4.2.2       | Blutdruckregulation (s. a. GK Anatomie 9.3.3)                                        |                                                              | 12.11.6,<br>12.11.6.5              | 12.11.1, 12.18.11.2 | 12.11.6.4, 12.19.6.7 |
| <b>4.3</b>  | <b>Niederdrucksystem</b>                                                             |                                                              | 12.11.6.7                          | 12.11.6.8           |                      |
| 4.3.1       | venöser Blutdruck                                                                    |                                                              | 12.11.1                            |                     |                      |
| 4.3.2       | intrathorakale Abschnitte                                                            |                                                              | 12.11.1                            |                     |                      |
| <b>4.4</b>  | <b>Organdurchblutung</b>                                                             |                                                              |                                    |                     |                      |
| 4.4.1       | Grundmechanismen (s. a. 4.1.4)                                                       |                                                              | 12.11.1                            | 12.11.6.6           |                      |
| 4.4.2       | Lunge                                                                                |                                                              | 12.14.2                            | 12.11.1             |                      |
| 4.4.3       | Gehirn                                                                               |                                                              | 12.11.6                            | 12.11.6.6           |                      |
| 4.4.4       | Niere                                                                                |                                                              | 12.11.6                            |                     |                      |
| 4.4.5       | Haut                                                                                 |                                                              | 12.11.6                            | 12.11.6.6           | 12.19.6.7            |
| 4.4.6       | Herz                                                                                 |                                                              | 12.11.6                            |                     |                      |
| 4.4.7       | Skelettmuskel (s. a. 6.2.4)                                                          |                                                              | 12.11.6                            | 12.11.6.6           |                      |
| 4.4.8       | Splanchnikusgebiet                                                                   |                                                              | 12.11.6                            | 12.11.6.6           |                      |
| 4.5         | Fetaler und plazentarer Kreislauf (s. 11.7 und 11.8)                                 | foetal                                                       | 12.11.6                            | 12.11.6.3           |                      |
| <b>5</b>    | <b>Atmung</b>                                                                        |                                                              |                                    |                     |                      |
| <b>5.1</b>  | <b>Morphologische Grundlagen (s. a. GK Anatomie 7.2)</b>                             |                                                              | 12.14.1                            | 12.14.1.2           |                      |
| <b>5.2</b>  | <b>Nicht-respiratorische Lungenfunktion</b>                                          |                                                              | 12.14.2.2                          |                     |                      |
| <b>5.3</b>  | <b>Physikalische Grundlagen (s. a. Kap. 1 sowie GK Physik, 2.7, 4.3 und 4.6)</b>     | Eigenschaften von Gasen                                      | 12.2.1.7,<br>12.14.2.2,<br>12.14.2 |                     |                      |
| <b>5.4</b>  | <b>Atemmechanik</b>                                                                  |                                                              | 12.14.2.5                          | 12.14.2.6           |                      |
| 5.4.1       | Lungenvolumina und Statik des Atemapparates                                          |                                                              | 12.14.2                            |                     |                      |
| 5.4.2       | Dynamik des Atemapparates (s. a. GK Anatomie 6.2 und 7.8.4)                          | lunge                                                        | 12.14.2                            |                     |                      |
| <b>5.5</b>  | <b>Lungenperfusion</b>                                                               | lungenkreislauf                                              | 12.14.2                            | 12.11.6.6           | 12.14.2.9            |
| <b>5.6</b>  | <b>Gasaustausch in der Lunge</b>                                                     |                                                              | 12.12.2.1                          | 12.14.2.7           | 12.14.2.8            |
| 5.6.1       | O <sub>2</sub> -Aufnahme, CO <sub>2</sub> -Abgabe                                    | gasaustausch                                                 | 12.14.2                            |                     |                      |
| 5.6.2       | Ventilation                                                                          |                                                              | 12.14.2                            |                     |                      |
| 5.6.3       | Diffusion                                                                            |                                                              | 12.14.2                            |                     |                      |
| 5.6.4       | Verteilung                                                                           |                                                              | 12.14.2                            |                     |                      |
| <b>5.7</b>  | <b>Atemgastransport im Blut (s. a. GK Chemie/Bioch. 25.1.1 bis 25.1.3)</b>           |                                                              | 12.14.2                            | 12.12.2.1           | 12.14.2.8            |
| 5.7.1       | O <sub>2</sub>                                                                       |                                                              | 12.14.2                            | 12.14.3.4           |                      |
| 5.7.2       | CO <sub>2</sub>                                                                      |                                                              | 12.14.2                            |                     |                      |
| 5.7.3       | Wechselwirkung zwischen O <sub>2</sub> - und CO <sub>2</sub> - Bindung               |                                                              | 12.14.2                            |                     |                      |
| <b>5.8</b>  | <b>Atemregulation</b>                                                                |                                                              | 12.18.13.3                         |                     |                      |
| 5.8.1       | Atemzentren, Atemreize                                                               |                                                              | 12.14.3,<br>12.18.9.1              | 12.14.3.1           | 12.14.3.2            |
| 5.8.2       | Formen normaler und veränderter Atmung                                               |                                                              | 12.14.3                            | 12.14.3.2           | 12.14.3.3            |
| <b>5.9</b>  | <b>Atmung unter ungewöhnlichen Bedingungen (s. a. GK Physik 2.7)</b>                 |                                                              | 12.14.3.3                          |                     |                      |
| <b>5.10</b> | <b>Säure-Basen-Gleichgewicht und Pufferung (s. a. GK Chemie/Bioch. 3.4 und 21.1)</b> | Reaktionstypen bei Säuren, Basen, Salzen und Metallkomplexen | 12.2.2.6                           | 12.14.3.5           | 12.16.2.6            |
| 5.10.1      | Pufferung und H <sup>+</sup> -Ionen                                                  |                                                              | 12.14.3                            |                     |                      |
| 5.10.2      | Pufferung und CO <sub>2</sub> -Austausch                                             |                                                              | 12.14.3                            |                     |                      |
| 5.10.3      | Säure-Basen Haushalt                                                                 |                                                              | 12.14.3                            |                     |                      |
| 5.10.4      | Störungen des Säure-Basen- Gleichgewichts                                            |                                                              | 12.14.3                            |                     |                      |
| <b>6</b>    | <b>Arbeits- und Leistungsphysiologie</b>                                             |                                                              |                                    |                     |                      |
| <b>6.1</b>  | <b>Allgemeine Grundlagen</b>                                                         |                                                              | 19.2.7                             |                     |                      |
| 6.1.1       | Muskelarbeit (s. a. 8.2 und 13.1.5)                                                  |                                                              | 12.10.3                            |                     |                      |
| 6.1.2       | Kurzzeitbelastung und Ausdauerleistung (s. a. 8.1.3)                                 |                                                              | 12.10.3                            |                     |                      |
| <b>6.2</b>  | <b>Organbeteiligung</b>                                                              |                                                              | 12.11.6.11                         |                     |                      |
| 6.2.1       | Blut (s. a. 2.1 und 2.2)                                                             |                                                              | 12.11.6                            |                     |                      |
| 6.2.2       | Lunge (s. a. 5.4.2 und 5.8)                                                          |                                                              | x                                  |                     |                      |
| 6.2.3       | Kreislaufsystem (s. a. 3.4, 4.2.2 und 4.4.7)                                         |                                                              | 12.11.6                            |                     |                      |
| 6.2.4       | Skelettmuskulatur (s. a. 13.2.2)                                                     |                                                              | 12.10.3                            |                     |                      |
| 6.2.5       | ZNS (s. a. 15.8.4)                                                                   |                                                              | 12.19.6.7                          |                     |                      |
| <b>6.3</b>  | <b>Erfassung von Leistung und Leistungsbeurteilung</b>                               |                                                              |                                    |                     |                      |
| 6.3.1       | Spiroergometrie (s. a. 5.4 und 5.6)                                                  |                                                              | 15.10.1                            |                     |                      |
| 6.3.2       | Training (s. a. 13.1.5 und 13.2)                                                     |                                                              | x                                  |                     |                      |
| 6.3.3       | Ermüdung und Erholung (s. a. 13.2.2)                                                 |                                                              | x                                  |                     |                      |
| <b>7</b>    | <b>Ernährung, Verdauungstrakt, Leber</b>                                             |                                                              |                                    |                     |                      |
| <b>7.1</b>  | <b>Ernährung (s. a. 8.1 sowie GK Physik 2,4 und GK Chemie/Bioch. 27.1)</b>           |                                                              | 12.15.4,<br>12.15.4.2              | 12.6.4.3            | 12.15.4.1            |
| 7.1.1       | Nahrungsmittel                                                                       |                                                              | 12.15.4                            |                     |                      |
| 7.1.2       | inadäquate Ernährung                                                                 |                                                              | 12.15.4                            |                     |                      |
| 7.1.3       | Regulation der Nahrungsaufnahme                                                      |                                                              | 12.15.4                            | 12.18.13.4          |                      |
| <b>7.2</b>  | <b>Motorik des Magen-Darm-Trakts</b>                                                 |                                                              | 12.15.2.2                          | 12.15.2.7           | 12.18.11.2           |
| 7.2.1       | Grundlagen                                                                           |                                                              | 12.15.2                            |                     |                      |
| 7.2.2       | Kauen und Schlucken                                                                  |                                                              | 12.15.2                            | 12.15.2.1           |                      |
| 7.2.3       | Magen                                                                                |                                                              | 12.15.1                            |                     |                      |
| 7.2.4       | Erbrechen                                                                            |                                                              | 20.110                             |                     |                      |



|             |                                                                                                                                                                                            |                                   |                            |                      |                      |
|-------------|--------------------------------------------------------------------------------------------------------------------------------------------------------------------------------------------|-----------------------------------|----------------------------|----------------------|----------------------|
| 7.2.5       | Dünn- und Dickdarm; Defäkation (s. a. GK Ana- tomie 8.2.5)                                                                                                                                 |                                   | 12.15.1                    | 12.15.1.6            |                      |
| <b>7.3</b>  | <b>Spekretion</b>                                                                                                                                                                          |                                   | 12.15.2.1                  | 12.15.2.2            | 12.15.2.6            |
| 7.3.1       | Grundlagen                                                                                                                                                                                 | Verdauungs-sekrete                | 12.15.2                    |                      |                      |
| 7.3.2       | Mund, Rachen, Ösophagus (s. a. GK Ana- tomie 5.4.6)                                                                                                                                        |                                   | 12.15.2                    |                      |                      |
| 7.3.3       | Magen (s. a. GK Ana- tomie 8.2.1)                                                                                                                                                          |                                   | 12.15.2                    |                      |                      |
| 7.3.4       | Pankreas (s. a. GK Ana- tomie 8.3.4)                                                                                                                                                       |                                   | 12.15.2                    |                      |                      |
| 7.3.5       | Leber und Galle (s. a. GK Che- mie/Bioch. Kap. 26 und GK Anat. 8.3.3)                                                                                                                      |                                   | 12.15.2                    |                      |                      |
| 7.3.6       | Dünn- und Dickdarmsekrete; Stuhl, Darmflora                                                                                                                                                |                                   | 12.15.2                    |                      |                      |
| <b>7.4</b>  | <b>Aufschluss der Nahrung (s. a. GK Chemie/Bioch. 27.2)</b>                                                                                                                                |                                   | 12.15.2.4                  | 12.15.2.5            |                      |
| 7.4.1       | Kohlenhydrate                                                                                                                                                                              | verdauung                         | 12.15.2                    |                      |                      |
| 7.4.2       | Proteine                                                                                                                                                                                   |                                   | 12.15.2                    |                      |                      |
| 7.4.3       | Lipide                                                                                                                                                                                     |                                   | 12.15.2                    |                      |                      |
| <b>7.5</b>  | <b>Absorption (s. a. GK Anatomie 8.2.2 und GK Chemie/Bioch. 27.2.)</b>                                                                                                                     |                                   | 12.15.2.5                  |                      |                      |
| 7.5.1       | Eigenschaften intestinaler Epithelien                                                                                                                                                      | verdauung                         | 12.15.2                    |                      |                      |
| 7.5.2       | Monosaccharide, Aminosäuren, Oligopeptide                                                                                                                                                  |                                   | 12.15.2                    |                      |                      |
| 7.5.3       | Lipide                                                                                                                                                                                     |                                   | 12.15.2                    |                      |                      |
| 7.5.4       | Wasser und Elektrolyte                                                                                                                                                                     |                                   | 12.15.2                    |                      |                      |
| 7.5.5       | sonstige Nahrungs- bestandteile                                                                                                                                                            |                                   | 12.15.2                    |                      |                      |
| <b>7.6</b>  | <b>Integrative Steuerung der Magen-Darm-Funktion (s. a. 7.2 und 14.3.5)</b>                                                                                                                |                                   | 12.15.2                    | 12.15.2.3            | 12.18.13.1           |
| <b>8</b>    | <b>Energie- und Wärmehaushalt</b>                                                                                                                                                          |                                   |                            |                      |                      |
| <b>8.1</b>  | <b>Energiehaushalt</b>                                                                                                                                                                     |                                   |                            |                      |                      |
| 8.1.1       | Grundlagen                                                                                                                                                                                 |                                   | 12.6                       |                      |                      |
| 8.1.2       | Energiequellen                                                                                                                                                                             | nahrung                           | 12.6                       | 12.6.1               | 12.16.1.2            |
| 8.1.3       | Energieumsatz (s. a. 6.1.2)                                                                                                                                                                |                                   | 12.6                       |                      | 12.16.1.2            |
| <b>8.2</b>  | <b>Wärmehaushalt und Temperaturregulation</b>                                                                                                                                              |                                   | 12.6.5.3                   | 12.6.5.1             | 12.18.13.4           |
| 8.2.1       | Körpertemperatur                                                                                                                                                                           | thermo                            | 12.6.5                     |                      |                      |
| 8.2.2       | Wärmebildung                                                                                                                                                                               |                                   | 12.6.5                     |                      |                      |
| 8.2.3       | Wärmeabgabe und -aufnahme                                                                                                                                                                  |                                   | 12.6.5                     | 12.6.5.4             |                      |
| 8.2.4       | Temperaturregulation                                                                                                                                                                       |                                   | 12.6.5                     |                      |                      |
| 8.2.5       | Akklimatisation                                                                                                                                                                            |                                   | 12.6.5                     |                      |                      |
| <b>9</b>    | <b>Wasser- und Elektrolythaushalt, Nierenfunktion</b>                                                                                                                                      |                                   |                            |                      |                      |
| <b>9.1</b>  | <b>Wasser- und Elektrolythaushalt</b>                                                                                                                                                      |                                   | 12.16.2, 12.16.2.3         | 12.16.2.1, 12.16.2.4 | 12.16.2.2, 12.16.2.5 |
| 9.1.1       | allgemeine Grundlagen                                                                                                                                                                      |                                   | 12.16.2                    | 12.2.3               |                      |
| 9.1.2       | Flüssigkeitsräume                                                                                                                                                                          |                                   | 12.16.2                    |                      |                      |
| 9.1.3       | Wasser                                                                                                                                                                                     | Elektrolythaushalt                | 12.16.2                    | 12.2.3               | 13.3.13              |
| 9.1.4       | Natrium (s. a. 10.2 und 10.3)                                                                                                                                                              | Elektrolythaushalt                | 12.16.2                    | 12.2.3               | 12.3.13              |
| 9.1.5       | Kalium                                                                                                                                                                                     | Elektrolythaushalt                | 12.16.2                    | 12.2.3               |                      |
| 9.1.6       | Calcium                                                                                                                                                                                    | Elektrolythaushalt                | 12.16.2                    | 12.2.3               |                      |
| 9.1.7       | Phosphat                                                                                                                                                                                   | Elektrolythaushalt                | 12.16.2                    | 12.2.3               |                      |
| 9.1.8       | Magnesium                                                                                                                                                                                  |                                   | x                          |                      |                      |
| 9.1.9       | Säure-Basen-Haushalt                                                                                                                                                                       |                                   | 12.16.2                    | 12.14.3              |                      |
| <b>9.2</b>  | <b>Niere</b>                                                                                                                                                                               |                                   | 12.16.1.1, 12.16.3.2       | 12.16.2, 12.16.3.1   | 12.16.3, 12.16.3.3   |
| 9.2.1       | Bau und Funktion                                                                                                                                                                           |                                   | 12.16                      | 12.16.1              |                      |
| 9.2.2       | Durchblutung                                                                                                                                                                               |                                   | 12.11.6                    | 12.16.1              | 12.11.6.6            |
| 9.2.3       | Filtration                                                                                                                                                                                 |                                   | 12.16.3                    | 12.16.1              |                      |
| 9.2.4       | Transport an renalen Epithelien                                                                                                                                                            |                                   | 12.16.3                    |                      |                      |
| 9.2.5       | Resorption, Sekretion                                                                                                                                                                      |                                   | 12.16.3                    |                      |                      |
| 9.2.6       | Harnkonzentrierung                                                                                                                                                                         |                                   | 12.16.3                    |                      |                      |
| 9.2.7       | globale Nierenfunktion und Regulator                                                                                                                                                       |                                   | 12.16.3                    |                      |                      |
| 9.2.8       | Stoffwechsel und Hormonbildung (s. a. GK Che- mie/Bioch. 29.1 und 29.2)                                                                                                                    |                                   | x                          |                      |                      |
| 9.2.9       | ableitende Harnwege                                                                                                                                                                        |                                   | 12.16.1                    | 12.16.3.4            |                      |
| <b>10</b>   | <b>Hormonelle Regulation (s. a. Kap. 7, 9 und 11 sowie GK Chemie/Bioch. Kap. 23)</b>                                                                                                       |                                   | 12.5.2, 12.5.2.3           | 12.5.2.1             | 12.5.2.2             |
| <b>10.1</b> | <b>Allgemeine Hormonlehre</b>                                                                                                                                                              | Regelprozesse und Regelprinzipien | 12.2.1.1, 12.5.1.5         | 12.5.1               | 12.5.1.4             |
| 10.1.1      | funktionelle Struktur des Hormonsystems                                                                                                                                                    |                                   | 12.5.1, 12.5.1.5           | 12.5.1.2             | 12.5.1.4             |
| 10.1.2      | Hormoneigenschaften                                                                                                                                                                        |                                   | 12.5.1, 12.5.1.5           | 12.5.1.4             |                      |
| 10.1.3      | Signalkette                                                                                                                                                                                |                                   | 12.5.1, 12.5.1.5           | 12.5.2               | 12.5.1.4             |
| 10.1.4      | neuroendokrine Signalübertragung                                                                                                                                                           |                                   | 12.5.1, 12.5.1.5           | 12.5.2, 12.18.13.1   | 12.5.1.4             |
| <b>10.2</b> | <b>Physiologie einzelner Hormone</b>                                                                                                                                                       |                                   | 12.5.1.5, 12.5.3.1         | 12.5.3, 12.5.3.2     | 12.5.1.4             |
| <b>10.3</b> | <b>Zusammenspiel von Hormonen in Wasser-, Elektrolyt- und Mineralhaushalt, Wachstum, Entwicklung, Stoffwechsel und Energiehaushalt (s. a. Kap. 8 und 9 sowie GK Chemie/Bioch. Kap. 18)</b> |                                   | 12.6.4, 12.5.1.5, 12.5.3.1 | 12.5.1, 12.5.3       | 12.5.1.4, 12.5.3.2   |
| <b>11</b>   | <b>Sexualentwicklung und Reproduktionsphysiologie (s. a. 10.1)</b>                                                                                                                         |                                   | 12.17.3.1                  | 12.17.3.2            |                      |
| 11.1        | Geschlechtsfestlegung und Pubertät (s. a. GK Biol. 2.4.3 und GK Psych./Soz. 1.4.8)                                                                                                         |                                   | 12.7.1                     |                      |                      |

|           |                                                                                                                     |                                   |                                    |                                    |                                 |
|-----------|---------------------------------------------------------------------------------------------------------------------|-----------------------------------|------------------------------------|------------------------------------|---------------------------------|
| 11.2      | Estrogene und Progesteron (s. a. GK Chemie/Bioch. 23.2.7)                                                           | zyklus                            | 12.1.7.2                           | 12.17.2.3                          | 12.18.4.1                       |
| 11.3      | <b>Menstruationszyklus</b>                                                                                          |                                   | 12.17.2.4                          |                                    |                                 |
| 11.4      | Androgene (s. a. GK Chemie/Bioch. 23.2.7)                                                                           |                                   | 12.1.7.2                           | 12.17.2.2                          |                                 |
| 11.5      | Gameten (s. a. GK Anatomie 1.1, 8.7.1 und 8.8.1)                                                                    |                                   | 12.1.7.2,<br>12.17.2.1             | 12.7.1                             | 12.7.1.1                        |
| 11.6      | Kohabitation und Befruchtung (s. a. GK Anat. 1.3 und 8.8.6 sowie GK Psych./Soz. 2.4.6)                              |                                   | 12.1.7.2                           | 12.7.1.3                           | 12.17.2.5                       |
| 11.7      | Schwangerschaft (s. a. GK Anat. 1.1.4 und 1.4 sowie GK Chemie/Bioch. 23.2.7)                                        |                                   | 12.1.7.3                           | 12.11.6.3                          |                                 |
| 11.8      | <b>Fetus</b>                                                                                                        |                                   | 12.1.7.3                           | 12.11.6.3                          |                                 |
| 11.9      | Geburt (s. a. GK Anat. 1.1.4 und 18.14.8)                                                                           |                                   | 12.1.7.3                           | 12.18.13.1                         |                                 |
| 11.10     | <b>Laktation</b>                                                                                                    |                                   | x                                  |                                    |                                 |
| 11.11     | <b>Alter</b>                                                                                                        |                                   | 12.20                              | 13.3.7                             |                                 |
| <b>12</b> | <b>Funktionsprinzipien des Nervensystems</b>                                                                        |                                   |                                    |                                    |                                 |
| 12.1      | <b>Ionenkanäle s. 1.3.2</b>                                                                                         |                                   | 12.5.2                             |                                    |                                 |
| 12.2      | <b>Ruhemembranpotential s. 1.5.1</b>                                                                                |                                   | 12.3.2                             |                                    |                                 |
| 12.3      | <b>Signalübertragung in Zellen (s. a. GK Chemie/Bioch. 32.4)</b>                                                    | Grundlagen der Elektrizitätslehre | 12.2.1.5,<br>12.5.2.1,<br>12.5.4.1 | 12.5.2, 12.5.2.2                   | 12.5.1, 12.5.2.3                |
| 12.3.1    | passive elektrische Eigenschaften                                                                                   |                                   | 12.5.4                             | 12.5.1                             |                                 |
| 12.3.2    | Aktionspotential                                                                                                    |                                   | 12.5.4                             | 12.5.1                             |                                 |
| 12.3.3    | Fortleitung des Aktionspotentials                                                                                   |                                   | 12.5.4                             | 12.5.1                             |                                 |
| 12.3.4    | intrazellulärer Transport (s. a. 1.3.3)                                                                             |                                   | 12.5.4                             | 12.5.1                             |                                 |
| 12.4      | <b>Signalübertragung zwischen Zellen (s. a. GK Chemie/Bioch. 32.4 und GK Anat. 2.8.1)</b>                           |                                   | 12.5.2,<br>12.5.1.7,<br>12.5.2.2   | 12.4.4.3, 12.5.1.8,<br>12.5.4.2    | 12.5.1.6, 12.5.2.1,<br>12.5.2.3 |
| 12.4.1    | Prinzipien synaptischer Übertragung                                                                                 |                                   | 12.5.4                             |                                    |                                 |
| 12.4.2    | Transmitterfreisetzung                                                                                              |                                   | 12.5.4                             | 12.5.1                             | 12.5.2                          |
| 12.4.3    | Transmitter                                                                                                         |                                   | 12.5.4, 12.18.2.5                  | 12.5.1                             | 12.5.2                          |
| 12.4.4    | Übertragung an der motorischen Endplatte                                                                            |                                   | 12.5.4                             |                                    |                                 |
| 12.4.5    | Liganden-gesteuerte Übertragung an zentralen Synapsen                                                               |                                   | 12.5.4                             |                                    |                                 |
| 12.4.6    | Second- messenger gesteuerte Übertragung an chemischen Synapsen                                                     |                                   | 12.5.4, 12.5.3.2                   | 12.5.3, 12.5.3.1                   | 12.5.3                          |
| 12.4.7    | Wirkmechanismen verschiedener Transmitter                                                                           |                                   | 12.5.4, 12.5.3.1                   | 12.5.1, 12.5.3.2                   | 12.5.2, 12.5.3                  |
| 12.4.8    | synaptische Plastizität                                                                                             |                                   | 12.5.4, 12.19.3.1                  | 12.19.3                            | 12.18.9.5                       |
| 12.5      | <b>Signalverarbeitung im Nervensystem</b>                                                                           |                                   |                                    |                                    |                                 |
| 12.5.1    | Elementarmechanismen                                                                                                |                                   | 12.5.4                             |                                    |                                 |
| 12.5.2    | Verarbeitung in Neuronen- populationer                                                                              |                                   | 12.5.4                             | 12.5.4.3                           |                                 |
| 12.6      | <b>Funktionsprinzipien sensorischer Systeme</b>                                                                     |                                   | 12.5.3, 12.5.3.2                   | 12.5.3.1                           | 12.19.2.1                       |
| 12.6.1    | allgemeine Aspekte                                                                                                  | sensor                            | 12.18.7                            |                                    |                                 |
| 12.6.2    | Rezeptorpotential/Sensorpotentia                                                                                    | sensor                            | 12.18.7                            |                                    |                                 |
| 12.6.3    | Transformation der Reize                                                                                            |                                   | x                                  |                                    |                                 |
| <b>13</b> | <b>Muskulatur</b>                                                                                                   |                                   | 12.4.3.1,12.4.3.4                  | 12.4.3.2,<br>12.10.3.2             | 12.4.3.3                        |
| 13.1      | <b>Allgemeine Muskelphysiologie (s. a. GK Biochemie 22.1.1 und 30.2)</b>                                            |                                   | 12.10.3.4                          |                                    |                                 |
| 13.1.1    | Myofilamente                                                                                                        | muskelgewebe                      | 12.4.3                             | 12.10.3.3                          | 12.10.3.4                       |
| 13.1.2    | Sarkolemm                                                                                                           |                                   | 12.4.3                             | 12.10.3.3                          | 12.10.3.4                       |
| 13.1.3    | sarkoplasmatisches Retikulum                                                                                        |                                   | 12.4.3                             | 12.10.3.4                          |                                 |
| 13.1.4    | Sarkoplasma                                                                                                         |                                   | 12.4.3                             | 12.10.3.4                          |                                 |
| 13.1.5    | Energieumwandlung                                                                                                   |                                   | 12.4.3                             | 12.10.3.4                          |                                 |
| 13.2      | <b>Quergestreifte Muskulatur</b>                                                                                    |                                   | 12.10.3.4                          |                                    |                                 |
| 13.2.1    | allgemeine Grundlagen                                                                                               |                                   | 12.10.3                            |                                    |                                 |
| 13.2.2    | Skelettmuskel (s. a. 6.3.2 und GK Anatomie 2.6.1)                                                                   |                                   | 12.10.3                            |                                    |                                 |
| 13.2.3    | Herzmuskel                                                                                                          |                                   | 12.11.2                            |                                    |                                 |
| 13.3      | <b>Glatte Muskulatur (s. a. GK Anatomie 2.6.3)</b>                                                                  |                                   | 12.18.13.1                         |                                    |                                 |
| <b>14</b> | <b>Vegetatives Nervensystem (VNS)</b>                                                                               |                                   | 12.18.2.7                          | 12.18.13.1                         |                                 |
| 14.1      | <b>Morphologische Grundlagen, Entwicklung, Wachstumsfaktoren, funktionelle Organisation (s. a. GK Anatomie 2.9)</b> |                                   | 12.18.13                           | 12.18.2                            |                                 |
| 14.2      | <b>Zelluläre und molekulare Mechanismen der Signaltransduktion im VNS</b>                                           |                                   | 12.5.2, 12.5.1.7,<br>12.5.2.2      | 12.5.1, 12.5.1.8,<br>12.5.2.3      | 12.5.1.6, 12.5.2.1              |
| 14.2.1    | synaptische Übertragung in den Ganglier                                                                             |                                   | 12.5.4                             |                                    |                                 |
| 14.2.2    | Informationsübertragung von postganglionären Axonen auf Zielorgane                                                  |                                   | 12.5.4, 12.5.3.2                   | 12.5.3                             | 12.5.3.1                        |
| 14.2.3    | Synthese und Abbau der Überträgerstoffe                                                                             | transmitter                       | 12.5.4                             | 12.5.1                             |                                 |
| 14.3      | <b>Funktionelle Organisation des VNS</b>                                                                            |                                   | 12.5.1                             | 12.14.3.4                          | 12.15.1.3                       |
| 14.3.1    | vegetative Steuerungen                                                                                              |                                   | 12.18.13                           | 12.16.3.4                          |                                 |
| 14.3.2    | vegetative Reflexe (s. a. GK Anatomie 8.2.5)                                                                        |                                   | 12.18.3.3                          | 12.16.3.4                          | 12.18.11.2                      |
| 14.3.3    | supraspinale Kontrolle durch das Stammhirn (s. a. GK Anatomie 9.3.3)                                                |                                   | 12.18.13                           |                                    |                                 |
| 14.3.4    | hypothalamische und limbische Steuerung                                                                             |                                   | 12.5.1, 12.19.6.3                  | 12.5.1.3                           | 12.5.3                          |
| 14.3.5    | enterisches Nervensystem                                                                                            |                                   | 12.15.2                            | 12.5.3.1                           | 12.5.3.2                        |
| <b>15</b> | <b>Motorik</b>                                                                                                      |                                   | 12.18.7.2,<br>12.18.8.4, 12.18.8,  | 12.18.8, 12.18.11.1,<br>12.18.11.2 | 12.18.8.2, 12.18.12             |

|             |                                                                         |                      |                      |                      |                                  |
|-------------|-------------------------------------------------------------------------|----------------------|----------------------|----------------------|----------------------------------|
| <b>15.1</b> | <b>Allgemeine Organisation des motorischen Systems, Willkürbewegung</b> |                      | 12.18.3.3            | 12.18.12             |                                  |
| <b>15.2</b> | <b>Motorische Repräsentation auf dem Kortex</b>                         |                      | 12.18.10             | 12.18.12             |                                  |
| 15.2.1      | primärer motorischer Kortex (Area 4)                                    |                      | 12.18.10             | 12.18.12             | 12.19.3.1                        |
| 15.2.2      | prä- und supplementär- motorischer Kortex (Area 6)                      |                      | 12.18.10             | 12.18.12             |                                  |
| 15.2.3      | motorischer Assoziations- kortex (u. a. Area 8)                         |                      | 12.18.10             | 12.18.12             |                                  |
| <b>15.3</b> | <b>Efferente Projektion der motorischen Kortizes</b>                    |                      |                      |                      |                                  |
| 15.3.1      | prinzipielle Verschaltungsmuster                                        |                      | 12.18.12             |                      |                                  |
| 15.3.2      | Projektion in subkortikale Gebiete                                      |                      | 12.18.12             |                      |                                  |
| <b>15.4</b> | <b>Neuronale Systeme des Rückenmarks</b>                                |                      | 12.5.4.3             | 12.18.11             | 12.18.13.1                       |
| 15.4.1      | Neuronentypen und ihre Lage                                             |                      | 12.18.2              |                      |                                  |
| 15.4.2      | Reflexsysteme des Rückenmarks                                           |                      | 12.18.11             |                      |                                  |
| 15.4.3      | Reflexsystem der Muskelspindelafferenzen                                |                      | 12.18.11             |                      |                                  |
| 15.4.4      | Reflexsystem der Golgi-Sehnenorgane                                     |                      | 12.18.11             |                      |                                  |
| 15.4.5      | Reflexsystem der Beugereflexe                                           |                      | 12.18.11             |                      |                                  |
| <b>15.5</b> | <b>Motorische Funktionen des Hirnstamms, Gleichgewichtssinn</b>         |                      | 12.18.8.1            |                      |                                  |
| 15.5.1      | Augenmotorik (s. a. 17.1.8)                                             |                      | 12.18.3              |                      |                                  |
| 15.5.2      | vestibuläres System, Bewegungs- und Lagesinr                            |                      | 12.18.8              | 12.18.13             |                                  |
| 15.5.3      | Vestibulariskerne und motorische Funktionen                             |                      | 12.18.8              | 12.18.13             |                                  |
| 15.5.4      | andere motorische Funktionen des Hirnstamms                             |                      | 12.18.13             |                      |                                  |
| <b>15.6</b> | <b>Basalganglien</b>                                                    |                      | 13.3.2               |                      |                                  |
| 15.6.1      | Verschaltung, Informationsfluss                                         |                      | x                    |                      |                                  |
| 15.6.2      | Verarbeitungsprinzipien                                                 |                      | 12.5.4.3             |                      |                                  |
| 15.6.3      | Störungen der Motorik                                                   |                      | 13.3.2.4             |                      |                                  |
| <b>15.7</b> | <b>Zerebellum</b>                                                       |                      |                      |                      |                                  |
| 15.7.1      | Verschaltung, Informationsfluss                                         |                      | x                    |                      |                                  |
| 15.7.2      | Verarbeitungsprinzipien                                                 |                      | x                    |                      |                                  |
| 15.7.3      | Störungen der Motorik                                                   |                      | 13.3.2.5             |                      |                                  |
| <b>15.8</b> | <b>Integrale motorische Funktionen des Zentralnervensystems</b>         |                      |                      |                      |                                  |
| 15.8.1      | Laufen und Geher                                                        |                      | 12.18.12             |                      |                                  |
| 15.8.2      | Stehen und Gleichgewicht                                                |                      | 12.18.8              | 12.18.12             |                                  |
| 15.8.3      | Ergreifen eines Gegenstandes                                            |                      | 12.18.12             | 12.19.3.1            |                                  |
| 15.8.4      | motorisches Lernen                                                      |                      | x                    |                      |                                  |
| 15.8.5      | Sprache (s. a. 18.5 und 20.1.3)                                         |                      | 12.19.7              | 12.14.2.4            | 12.19.7.3                        |
| <b>15.9</b> | <b>Störungen der Motorik</b>                                            |                      |                      |                      |                                  |
| 15.9.1      | Muskeltonus                                                             |                      | x                    |                      |                                  |
| 15.9.2      | Spastik                                                                 |                      | 20.100               | 12.5.4.3             |                                  |
| 15.9.3      | Tremor                                                                  |                      | 20.19                |                      |                                  |
| 15.9.4      | Querschnittsverletzung des Rückenmarks                                  |                      | 21.1.10.6            |                      |                                  |
| <b>16</b>   | <b>Somato-viszerale Sensorik</b>                                        |                      | 12.18.7.2, 12.18.9.3 | 12.18.8, 12.19.2.1   | 12.18.8.4, 12.18.13.2, 12.19.6.7 |
| <b>16.1</b> | <b>Funktionelle und morphologische Grundlagen</b>                       |                      | 12.18.7, 12.18.10.1  | 12.18.7.1            | 12.18.8.3                        |
| 16.1.1      | Einteilung, Modalitäten und Qualitäten                                  |                      | 12.18.7              | 12.19.2              | 12.18.7.1                        |
| 16.1.2      | rezeptive und afferente Strukturen                                      |                      | 12.18.7              | 12.19.2              | 12.18.7.1                        |
| 16.1.3      | spinale Strukturen                                                      |                      | 12.18.7              | 12.19.2              | 12.18.7.1                        |
| 16.1.4      | supraspinale Strukturen                                                 |                      | 12.18.7              | 12.19.2              | 12.18.7.1                        |
| <b>16.2</b> | <b>Tastsinn</b>                                                         |                      | 12.18.7              | 12.18.7.1            |                                  |
| 16.2.1      | Qualitäten                                                              |                      | 12.18.7              | 12.18.7.1            |                                  |
| 16.2.2      | Eigenschaften der Sensoren                                              |                      | 12.18.7              | 12.18.7.1            |                                  |
| 16.2.3      | funktionelle Organisation                                               |                      | 12.18.7              | 12.18.7.1            |                                  |
| 16.2.4      | Besonderheiten des Tastsinnes der Hanc                                  |                      | 12.18.7              | 12.18.7.1            |                                  |
| <b>16.3</b> | <b>Temperatursinn</b>                                                   |                      | 12.18.7              | 12.18.7.1            |                                  |
| 16.3.1      | Warm-/Kaltsensoren, afferente Bahnen und zentralnervöse Projektionen    |                      | 12.18.7              |                      |                                  |
| 16.3.2      | funktionelle Organisation des Warm-/Kaltsinnes                          |                      | 12.18.7              |                      |                                  |
| <b>16.4</b> | <b>Tiefensensibilität</b>                                               |                      | 12.18.8.1            | 12.18.11.1           | 12.18.11.2                       |
| 16.4.1      | funktionelle Organisation                                               |                      | 12.18.8              |                      |                                  |
| 16.4.2      | biologische Bedeutung der Tiefensensibilität                            |                      | 12.18.8              |                      |                                  |
| <b>16.5</b> | <b>Viszerale Sensorik</b>                                               |                      | 12.18.11.2           |                      |                                  |
| 16.5.1      | periphere und zentrale Sensorer                                         |                      | 12.18.8              |                      |                                  |
| 16.5.2      | viszerale Sensibilität                                                  |                      | 12.18.8              | 12.16.3.4            |                                  |
| 16.5.3      | viszerale Reflexe                                                       |                      | 12.18.11             |                      |                                  |
| <b>16.6</b> | <b>Nozizeption</b>                                                      |                      | 12.18.9.2            | 12.18.9.4, 12.19.3.1 | 12.18.9.5                        |
| 16.6.1      | Nozizeptoren und periphere Nozizeptor                                   |                      | 12.18.9              | 12.18.9.1            |                                  |
| 16.6.2      | Nervenläsionen                                                          |                      | 12.18.9              |                      |                                  |
| 16.6.3      | spinale und trigeminale Organisation der Nozizeptor                     |                      | 12.18.9              | 12.5.4.3             |                                  |
| 16.6.4      | supraspinale Organisation von Nozizeption und Schmerz.                  |                      | 12.18.9              |                      |                                  |
| 16.6.5      | endogene Schmerzhemmung                                                 |                      | 12.18.9              | 12.5.4.3             |                                  |
| <b>17</b>   | <b>Visuelles System</b>                                                 |                      | 12.18.10.2           | 12.19.2.1            |                                  |
| <b>17.1</b> | <b>Dioptrischer Apparat</b>                                             | Grundlagen der Optik | 12.2.1.6             | 12.18.3.6            | 12.18.11.2                       |
| 17.1.1      | physikalische Grundlagen (s. a. GK Physik 7)                            |                      | 12.18.3              |                      |                                  |
| 17.1.2      | Auge als optisches System                                               |                      | 12.18.3              |                      |                                  |
| 17.1.3      | Abbildungsfehler                                                        |                      | 12.18.3              |                      |                                  |
| 17.1.4      | Akkommodation                                                           |                      | 12.18.3              |                      |                                  |
| 17.1.5      | Pupille                                                                 |                      | 12.18.3              | 12.18.3.3            |                                  |
| 17.1.6      | Augeninnendruck                                                         |                      | 12.18.3              |                      |                                  |
| 17.1.7      | Tränen (s. a. GK Anat. 10.4.3)                                          |                      | 12.18.3              | 12.18.3.4            |                                  |
| 17.1.8      | Augenmotorik (s. a. 15.5.1 und GK Anat. 10.3.6)                         |                      | 12.18.3              | 12.18.3.3            |                                  |
| <b>17.2</b> | <b>Signalverarbeitung in der Retina</b>                                 |                      | 12.18.3.5            |                      |                                  |

|             |                                                                                                       |                                                      |                               |                       |                               |
|-------------|-------------------------------------------------------------------------------------------------------|------------------------------------------------------|-------------------------------|-----------------------|-------------------------------|
| 17.2.1      | Aufbau der Retina (s. a. GK Anat. 10.3.4)                                                             |                                                      | 12.18.3                       | 12.18.3.2             |                               |
| 17.2.2      | Transduktionsprozess (s. a. GK Chemie/Bio- ch. 33.1)                                                  |                                                      | 12.18.3, 12.5.3.2             | 12.5.3                | 12.5.3.1                      |
| 17.2.3      | neuronale Verarbeitungsprozesse                                                                       |                                                      | 12.18.3                       |                       |                               |
| 17.2.4      | retinale Mechanismen des Farbsehens                                                                   |                                                      | 12.18.3                       | 12.18.3.7             |                               |
| <b>17.3</b> | <b>Zentrale Repräsentation des visuellen Systems</b>                                                  |                                                      |                               |                       |                               |
| 17.3.1      | Gesichtsfeld                                                                                          |                                                      | 12.18.3                       |                       |                               |
| 17.3.2      | Sehbahn (s. a. GK Ana- tomie 9.8.1)                                                                   |                                                      | 12.18.3                       |                       |                               |
| <b>17.4</b> | <b>Informationsverarbeitung in der Sehbahn</b>                                                        |                                                      |                               |                       |                               |
| 17.4.1      | Verschaltung der Sehbahn                                                                              |                                                      | 12.18.3                       |                       |                               |
| 17.4.2      | Retina                                                                                                |                                                      | 12.18.3                       |                       |                               |
| 17.4.3      | Corpus geniculatum laterale                                                                           |                                                      | 12.18.3                       |                       |                               |
| 17.4.4      | visuelle Kortizes (Areae 17, 18; V1-V5)                                                               |                                                      | 12.18.3                       |                       |                               |
| 17.4.5      | „extrastriäre Sehbahn“                                                                                |                                                      | 12.18.3                       |                       |                               |
| 17.4.6      | Tiefenwahrnehmung                                                                                     |                                                      | 12.18.3                       |                       |                               |
| <b>18</b>   | <b>Auditorisches System</b>                                                                           |                                                      | 12.19.2.1                     |                       |                               |
| <b>18.1</b> | <b>Physiologische Akustik</b>                                                                         | Bedeutung von Schwingungen und Wellen in der Medizin | 12.2.1.4                      |                       |                               |
| 18.1.1      | Grundbegriffe (s. a. GK Physik 6.3)                                                                   |                                                      | 12.18.4                       |                       |                               |
| 18.1.2      | Testverfahren                                                                                         |                                                      | 12.18.4                       |                       |                               |
| <b>18.2</b> | <b>Äußeres Ohr, Gehörgang und Mittelohr (s. a. GK Anat. 11.2 und 11.3)</b>                            |                                                      | 12.18.4                       | 12.18.4.1             | 12.18.4.2, 12.18.4.3          |
| <b>18.3</b> | <b>Innenohr (s. a. GK Anat. 11.4.1)</b>                                                               |                                                      | 12.18.4, 12.18.4.5            | 12.18.4.1, 12.18.4.6  | 12.18.4.4, 12.18.10.3         |
| <b>18.4</b> | <b>Zentrale Hörbahn und kortikale Repräsentation (s. a. GK Anat. 9.8.1)</b>                           |                                                      | 12.18.4                       | 12.18.4.6             | 12.18.4.7, 12.18.10.3         |
| <b>18.5</b> | <b>Sprachbildung und Sprachverständnis (s. a. 15.8.5)</b>                                             |                                                      | 12.18.4                       | 12.19.7.3             |                               |
| 18.5.1      | Stimmbildung (s. a. GK Anat. 5.4.11)                                                                  |                                                      | 12.18.4                       | 12.19.7.4             |                               |
| 18.5.2      | Sprachverständnis                                                                                     |                                                      | 12.18.4                       |                       |                               |
| <b>19</b>   | <b>Chemische Sinne</b>                                                                                |                                                      | 12.19.2.1                     |                       |                               |
| <b>19.1</b> | <b>Grundlagen der chemischen Sinne</b>                                                                |                                                      | 12.18.5, 12.18.6.2            | 12.18.5.2, 12.18.11.2 | 12.18.6.1                     |
| 19.1.1      | Einteilung, morphologische Grundlagen und sensorische Funktionen                                      |                                                      | 12.18, 12.18.6.2              | 12.18.6               | 12.18.6.1                     |
| 19.1.2      | Schutzreflexe, viszerale und sekretorische Reflexe                                                    | Reflex                                               | 12.18.11, 12.18.6.2           | 12.18.6, 12.18.11     | 12.18.6.1, 12.19.4.1          |
| <b>19.2</b> | <b>Geschmack</b>                                                                                      |                                                      | 12.18.6.2                     |                       | 12.18.6.1                     |
| 19.2.1      | Geschmacksqualitäten und Psycho- physiologie des Geschmackssinns                                      |                                                      | 12.18.6                       |                       |                               |
| 19.2.2      | Sensoren                                                                                              |                                                      | 12.18.6, 12.5.3.2             | 12.5.3                | 12.5.3.1                      |
| 19.2.3      | zentrale Projektionen                                                                                 |                                                      | 12.18.6                       |                       |                               |
| <b>19.3</b> | <b>Geruchssinn und trigeminaler chemischer Sinn</b>                                                   |                                                      | 12.18.5                       | 12.18.5.2             |                               |
| 19.3.1      | Sinnesmodalitäten, Qualitäten und Psychophysiologie des Geruchs                                       |                                                      | 12.18.5                       |                       |                               |
| 19.3.2      | Transduktionsprozesse (s. a. GK Chemie/Bio- ch. 33.2)                                                 |                                                      | 12.18.5, 12.5.3.2             | 12.5.3                | 12.5.3.1                      |
| 19.3.3      | Bahnen und zentral-nervöse Verarbeitung                                                               |                                                      | 12.18.5                       | 12.18.5.1             |                               |
| 19.3.4      | Assoziationsregionen für den Geruchssinn                                                              |                                                      | 12.18.5                       | 12.18.5.3             | 12.19.6.7                     |
| <b>20</b>   | <b>Integrative Leistungen des Zentralnervensystems</b>                                                |                                                      |                               |                       |                               |
| <b>20.1</b> | <b>Allgemeine Physiologie und funktionelle Anatomie der Großhirnrinde</b>                             |                                                      | 12.18.2.2                     |                       |                               |
| 20.1.1      | Organisation der Großhirnrinde (s. a. GK Ana- tomie 9.7.3)                                            |                                                      | 12.18                         |                       |                               |
| 20.1.2      | kortikale Felder                                                                                      |                                                      | 12.18.10                      | 12.19.3.1             | 12.19.9.5                     |
| 20.1.3      | kortikale Asymmetrie, Händig- keit und Sprachfunktionen                                               |                                                      | 12.19.7                       | 12.18.10              | 12.19.7.3                     |
| 20.1.4      | Analyse der Hirnrindenaktivität und tiefer liegender Kerngebiete (s. a. GK Psych./Soz. 1.3.6)         |                                                      | 12.18.2                       |                       |                               |
| <b>20.2</b> | <b>Integrative Funktionen durch Interaktionen zwischen Hirnrinde und subkortikalen Hirnre- gionen</b> |                                                      | 12.18.2.1                     | 12.18.13.3            |                               |
| 20.2.1      | zirkadiane Periodik                                                                                   |                                                      | 14b.5                         | 12.18.13.1            |                               |
| 20.2.2      | Bewusstsein (s. a. GK Psych./Soz. 1.4.1)                                                              |                                                      | 12.19.1                       | 12.19.2               |                               |
| 20.2.3      | Plastizität, Gedächtnis und Lernen (s. a. GK Psych./Soz. 1.4.2 und 1.4.3)                             |                                                      | 12.19.3, 12.19.3.3, 12.19.8.4 | 12.19.3.1, 12.19.3.4  | 12.19.3.2, 12.19.4.1          |
| 20.2.4      | Antrieb, Motivation und Emotionen (s. a. GK Psych./Soz. 1.4.4 und 1.4.5)                              |                                                      | 12.18.12, 12.19.5.4           | 12.19.6, 12.19.5.8    | 12.19.3, 12.19.6.3, 12.19.6.7 |

### 3.6. Grundlagen der Medizinischen Psychologie und der Medizinischen Soziologie

| GK Psychologie und Soziologie                   |                                                                                                                          | Synonym                                                                              | Abgleich mit NKLM                                                                  |                                                                                          |                                                                            |
|-------------------------------------------------|--------------------------------------------------------------------------------------------------------------------------|--------------------------------------------------------------------------------------|------------------------------------------------------------------------------------|------------------------------------------------------------------------------------------|----------------------------------------------------------------------------|
| <b>1 Entstehung und Verlauf von Krankheiten</b> |                                                                                                                          |                                                                                      |                                                                                    |                                                                                          |                                                                            |
| <b>1.1</b>                                      | <b>Bezugssysteme von Gesundheit und Krankheit</b>                                                                        |                                                                                      | 12.2.6.3                                                                           |                                                                                          |                                                                            |
| 1.1.1                                           | Gesundheit und Krankheit                                                                                                 |                                                                                      | 12.2.6, 12.2.6.2, 12.9.1.5, 12.10.3.7, 12.11.6.12, 12.12.2.5, 12.13.4.5            | 12.14.3.6, 12.15.4.3, 12.16.3.5, 12.17.3.3, 12.18.13.5, 12.18.2.10                       | 12.18.3.8, 12.18.4.8, 12.18.5.3, 12.18.6.3, 12.18.7.3, 12.18.8.5           |
| 1.1.2                                           | Die betroffene Person                                                                                                    |                                                                                      | 12.2.6, 12.2.6.5, 12.9.1.5, 12.10.3.7, 12.11.6.12, 12.12.2.5, 12.13.4.5, 12.14.3.6 | 12.15.4.3, 12.16.3.5, 12.17.3.3, 12.18.13.5, 12.18.2.10, 12.18.3.8, 12.18.4.8, 12.18.5.3 | 2.18.6.3, 12.18.7.3, 12.18.8.5, 12.18.9.3, 12.19.2.1, 12.19.2.2, 12.19.2.3 |
| 1.1.3                                           | Die Medizin als Wissens- und Handlungssystem                                                                             | Menschen als soziales Wesen                                                          | 12.2.6.3                                                                           | 12.20.1.1                                                                                |                                                                            |
| 1.1.4                                           | Die Gesellschaft                                                                                                         |                                                                                      | 12.2.6, 12.2.6.3                                                                   | 12.20.1.1, 12.20.1.2                                                                     |                                                                            |
| <b>1.2</b>                                      | <b>Gesundheits- und Krankheitsmodelle</b>                                                                                |                                                                                      | 12.9.1.5, 12.10.3.7, 12.11.6.12, 12.12.2.5, 12.13.4.5, 12.14.3.6                   | 12.15.4.3, 12.16.3.5, 12.17.3.3, 12.18.13.5, 12.18.2.10, 12.18.3.8                       | 12.18.4.8, 12.18.5.3, 12.18.6.3, 12.18.7.3, 12.18.8.5                      |
| 1.2.1                                           | Verhaltensmodelle                                                                                                        |                                                                                      | 12.2.6, 12.2.6.4, 12.18.9.4                                                        | 12.18.9.5, 12.19.10.3, 12.19.10.5                                                        | 12.19.4.1, 12.19.4.2                                                       |
| 1.2.2                                           | Psychobiologische Modelle                                                                                                | biopsychol                                                                           | 12.2.6, 12.18.3.7, 12.18.9.4, 12.19.2.1, 12.19.3.5                                 | 12.20.1.3, 14c.1.1, 12.18.4.6, 12.18.9.5, 12.19.2.3                                      | 16.1.6, 12.18.9.3, 12.19.10, 12.19.10.1, 12.19.10.2                        |
| 1.2.3                                           | Psychodynamische Modelle                                                                                                 |                                                                                      | 15.12.2                                                                            | 12.19.10.6                                                                               |                                                                            |
| 1.2.4                                           | Sozialpsychologische Modelle                                                                                             | psychosozial                                                                         | 12.2.6, 12.2.6.3, 12.19.5.5                                                        | 12.19.5.6, 12.19.10.3, 12.19.10.5                                                        | 12.20.1.1, 12.20.1.3, 12.20.1.2                                            |
| 1.2.5                                           | Soziologische Modelle                                                                                                    |                                                                                      | 12.2.1.2, 12.2.6.3, 12.2.7.2                                                       | 12.19.5.5, 12.19.10.3                                                                    | 12.20.1.1, 12.20.1.2, 12.20.1.3                                            |
| <b>1.3</b>                                      | <b>Methodische Grundlagen</b>                                                                                            |                                                                                      | 15.1.1                                                                             |                                                                                          |                                                                            |
| 1.3.1                                           | Hypothesenbildung                                                                                                        | Bedeutung hypothetischer Konstrukte                                                  | 14a.2.1                                                                            | 12.2.6.1                                                                                 |                                                                            |
| 1.3.2                                           | Operationalisierung                                                                                                      |                                                                                      | 14a.2.1                                                                            | 12.2.6.1                                                                                 | 12.19.8.1                                                                  |
| 1.3.3                                           | Testdiagnostik                                                                                                           |                                                                                      | 14a.2.1                                                                            | 12.2.6.1                                                                                 |                                                                            |
| 1.3.4                                           | Untersuchungsplanung                                                                                                     |                                                                                      | 14a.2.2                                                                            |                                                                                          |                                                                            |
| 1.3.5                                           | Sozialwissenschaftliche Methoden der Datengewinnung                                                                      |                                                                                      | 14a.2.2                                                                            |                                                                                          |                                                                            |
| 1.3.6                                           | Psychobiologische Methoden der Datengewinnung                                                                            |                                                                                      | 14a.2.2                                                                            | 12.19.10.2                                                                               |                                                                            |
| 1.3.7                                           | Datenauswertung und -interpretation                                                                                      |                                                                                      | 14a.3.1                                                                            |                                                                                          |                                                                            |
| 1.3.8                                           | Ergebnisbewertung                                                                                                        |                                                                                      | 14a.3.1                                                                            |                                                                                          |                                                                            |
| <b>1.4</b>                                      | <b>Theoretische Grundlagen</b>                                                                                           |                                                                                      | 12.9.1.5, 12.10.3.7, 12.11.6.12, 12.12.2.5, 12.13.4.5, 12.14.3.6, 12.15.4.3        | 12.16.3.5, 12.17.3.3, 12.18.13.5, 12.18.2.10, 12.18.3.8, 12.18.4.8, 12.18.5.3            | 12.18.6.4, 12.18.7.3, 12.18.8.5, 12.18.12.3, 12.19.6.7                     |
| 1.4.1                                           | Psychobiologische Grundlagen                                                                                             | biopsych                                                                             | 12.2.6, 12.18.2.3, 12.18.3.7, 12.18.4.6                                            | 12.19.2.1, 12.19.2.3, 12.19.2.4                                                          | 12.19.3.5, 12.19.4.4, 12.19.5.8                                            |
| 1.4.2                                           | Lernen                                                                                                                   |                                                                                      | 12.18.9.4, 12.18.9.5, 12.19.2.4, 12.19.3.5                                         | 12.19.4, 12.19.4.1, 12.19.4.2                                                            | 12.19.4.4, 12.19.4.5, 12.19.4.6                                            |
| 1.4.3                                           | Kognition                                                                                                                |                                                                                      | 12.19.2.1, 12.19.2.2, 12.19.2.3, 12.19.2.4, 12.19.3.3                              | 12.19.3.4, 12.19.3.5, 12.19.7.1, 12.19.7.3, 12.19.8.1                                    | 12.19.8.2, 12.19.8.3, 12.19.8.4, 13.3.2                                    |
| 1.4.4                                           | Emotion                                                                                                                  |                                                                                      | 12.19.2.4, 12.19.3.5, 12.19.4.5, 12.19.4.6, 12.19.5.8                              | 12.19.6, 12.19.6.1, 12.19.6.2, 12.19.6.3, 12.19.6.4                                      | 12.19.6.5, 12.19.6.7, 12.19.10.3, 12.19.10.5                               |
| 1.4.5                                           | Motivation                                                                                                               |                                                                                      | 12.19.2.4, 12.19.3.5, 12.19.4.4, 12.19.5                                           | 12.19.5.1, 12.19.5.2, 12.19.5.3                                                          | 12.19.5.4, 12.19.5.7, 12.19.5.8                                            |
| 1.4.6                                           | Persönlichkeit und Verhaltensstile                                                                                       |                                                                                      | 12.7.2, 12.19.2.4, 12.19.3.5, 12.19.9, 12.19.9.1                                   | 12.19.9.2, 12.19.9.3, 12.19.9.4, 12.19.9.5                                               | 12.19.10.1, 12.19.10.2, 12.19.10.3, 12.19.10.5                             |
| 1.4.7                                           | Entwicklung und primäre Sozialisation (Kindheit)                                                                         | grundlegende Mechanismen der Entstehung und                                          | 12.2.7.1, 12.2.7.2, 12.7.2, 12.7.2.1, 12.7.2.5                                     | 12.19.2.4, 12.19.3.5, 12.19.7.2, 12.19.8.2, 12.19.9.7                                    | 12.19.10.1, 12.19.10.3, 12.20.1.1, 12.20.1.2, 12.20.2.1                    |
| 1.4.8                                           | Entwicklung und Sozialisation im Lebenslauf (Adoleszenz, mittleres Erwachsenenalter, Senium) und sekundäre Sozialisation | Aufrechterhaltung sozialer Strukturen und Institutionen                              | 12.2.7.1, 12.2.7.2, 12.7.2, 12.7.2.1, 12.7.2.5                                     | 12.19.2.4, 12.19.3.5, 12.19.8.2, 12.19.10.1                                              | 12.19.10.3, 12.19.10.4, 12.20.1.1, 12.20.1.2                               |
| 1.4.9                                           | Soziodemographische Determinanten des Lebenslaufs                                                                        | demographisch                                                                        | 12.7.2.1, 12.7.2.5, 12.19.2.4                                                      | 12.19.3.5, 12.19.10.1, 12.19.10.3                                                        | 12.20.2.2, 18.5.1                                                          |
| 1.4.10                                          | Sozialstrukturelle Determinanten des Lebenslaufs                                                                         |                                                                                      | 12.2.7.2, 12.7.2.1                                                                 | 12.7.2.5, 12.20.2.1                                                                      | 12.20.2.2, 12.20.2.3                                                       |
| <b>2 Ärztliches Handeln</b>                     |                                                                                                                          |                                                                                      |                                                                                    |                                                                                          |                                                                            |
| <b>2.1</b>                                      | <b>Arzt-Patient-Beziehung</b>                                                                                            |                                                                                      |                                                                                    |                                                                                          |                                                                            |
| 2.1.1                                           | Ärztliche Berufstätigkeit                                                                                                |                                                                                      | 14c.1.1                                                                            |                                                                                          |                                                                            |
| 2.1.2                                           | Arztrolle                                                                                                                |                                                                                      | 14c.1.1                                                                            | 12.20.1.2                                                                                |                                                                            |
| 2.1.3                                           | Krankenrolle                                                                                                             | Gesundheits- und Krankheitserleben als subjektive Prozesse in ihren Wechselwirkungen | 12.2.6.5, 12.19.10.2, 12.19.10.3                                                   | 12.19.10.5, 12.19.5.5                                                                    | 12.20.1.2, 14c.1.1                                                         |
| 2.1.4                                           | Kommunikation und Interaktion                                                                                            |                                                                                      | 14c.1.1                                                                            | 12.20.1.3                                                                                |                                                                            |
| 2.1.5                                           | Besonderheiten der Kommunikation und Kooperation                                                                         |                                                                                      | 14c.1.1                                                                            |                                                                                          |                                                                            |
| <b>2.2</b>                                      | <b>Untersuchung und Gespräch</b>                                                                                         |                                                                                      | 12.19.4.3                                                                          |                                                                                          |                                                                            |
| 2.2.1                                           | Erstkontakt                                                                                                              |                                                                                      | 14c.5.4                                                                            | 12.19.5.5                                                                                |                                                                            |
| 2.2.2                                           | Exploration und Anamnese                                                                                                 |                                                                                      | 14c.2.4                                                                            | 14c.2.8                                                                                  | 12.20.1.3                                                                  |
| 2.2.3                                           | Körperliche Untersuchung                                                                                                 |                                                                                      | 14b.2                                                                              | 12.19.6.6                                                                                |                                                                            |
| <b>2.3</b>                                      | <b>Urteilsbildung und Entscheidung</b>                                                                                   |                                                                                      |                                                                                    |                                                                                          |                                                                            |
| 2.3.1                                           | Grundlagen der diagnostischen Entscheidung                                                                               |                                                                                      | 15.1                                                                               |                                                                                          |                                                                            |
| 2.3.2                                           | Urteilsqualität                                                                                                          |                                                                                      | 15.1                                                                               |                                                                                          |                                                                            |

|            |                                                                   |            |                                |                       |                      |
|------------|-------------------------------------------------------------------|------------|--------------------------------|-----------------------|----------------------|
| <b>2.4</b> | <b>Interventionsformen und besondere medizinische Situationen</b> |            |                                |                       |                      |
| 2.4.1      | Ärztliche Beratung und Patientenschulung                          |            | 14c.2.5,12.19.6.6              | 14c.2.8               | 14c.4.3              |
| 2.4.2      | Psychotherapie                                                    |            | 16.7.3,12.19.4.4               | 16.7.6                | 16.7.7               |
| 2.4.3      | Intensiv- und Notfallmedizin                                      |            | AP 17                          | 12.19.6.6             | 12.19.10.6           |
| 2.4.4      | Transplantationsmedizin und Onkologie                             |            | 16.4.12                        | 12.19.6.6             |                      |
| 2.4.5      | Humangenetische Beratung und Reproduktionsmedizin                 |            | 18.3.7                         | 12.19.6.6             | 12.20.1.3            |
| 2.4.6      | Sexualmedizin                                                     |            | 12.19.6.6                      |                       |                      |
| 2.4.7      | Tod und Sterben, Trauer                                           |            | 18.3.4                         | 12.19.6.6             | 12.19.10.6           |
| <b>2.5</b> | <b>Patient und Gesundheitssystem</b>                              |            |                                |                       |                      |
| 2.5.1      | Stadien des Hilfesuchens                                          |            | 12.20.2                        | 12.19.5.7             | 12.20.2.2            |
| 2.5.2      | Bedarf und Nachfrage                                              |            | 12.20.2                        |                       |                      |
| 2.5.3      | Patientenkarrieren im Versorgungssystem                           |            | x                              |                       |                      |
| 2.5.4      | Qualitätsmanagement im Gesundheitswesen                           |            | 10.5                           |                       |                      |
| <b>3</b>   | <b>Förderung und Erhaltung von Gesundheit</b>                     |            |                                |                       |                      |
| <b>3.1</b> | <b>Prävention</b>                                                 |            | 15.1.1                         |                       |                      |
| 3.1.1      | Präventionsbegriff                                                |            | 16.1.2                         |                       |                      |
| 3.1.2      | Modelle gesundheitsrelevanten                                     | gesundheit | 12.19.5                        | 12.19.5.5             | 12.19.5.6            |
| 3.1.3      | Primäre Prävention                                                |            | 16.1.2, 12.20.2.3              | 12.19.5.6             |                      |
| 3.1.4      | Sekundäre Prävention                                              |            | 16.1.2                         | 12.19.4.4             | 12.19.5.6            |
| 3.1.5      | Tertiäre Prävention                                               |            | 16.1.2, 12.19.10.2, 12.19.10.3 | 12.19.5.6, 12.19.10.5 | 12.20.2.3, 12.20.1.3 |
| 3.1.6      | Rehabilitation                                                    |            | 16.8,12.20.2.3                 | 12.19.5.6             | 12.20.1.3            |
| <b>3.2</b> | <b>Maßnahmen</b>                                                  |            | 12.20.2.3                      | 15.1.1                |                      |
| 3.2.1      | Gesundheitserziehung und Gesundheitsförderung                     |            | 16.7.18, 12.20.2.3             | 19.1                  | 12.19.5.6            |
| 3.2.2      | Rehabilitation, Selbsthilfe und Pflege                            |            | 14c.2.8                        | 12.19.5.6             | 12.20.2.3            |

#### **4. NKLM im Vergleich zum GK-2**

#### 4.1. GK-2 Teil 1: Gesundheitsstörungen

| GK-2 Teil 1: Gesundheitsstörungen                                           | Synonym                                 | Abgleich mit NKLM                           |                                                   |                                          |
|-----------------------------------------------------------------------------|-----------------------------------------|---------------------------------------------|---------------------------------------------------|------------------------------------------|
| <b>1.0 Allgemeine Symptome und Befunde</b>                                  |                                         |                                             |                                                   |                                          |
| 1.1 Abnorme Gewichtsabnahme                                                 |                                         | 20.42                                       |                                                   |                                          |
| 1.2 Abnorme Gewichtszunahme                                                 |                                         | 20.43                                       |                                                   |                                          |
| 1.3 Abnormer Körpergeruch                                                   | Geruch                                  | 20.11                                       |                                                   |                                          |
| 1.4 Adynamie                                                                | Schwäche, Erschöpfung, Müdigkeit        | 20.63                                       | 14b.5.7                                           |                                          |
| 1.5 Blutungsneigung bzw. Blutungen                                          | Blutungen                               | 13.3.6.4,<br>14b.2.3,<br>17.6.1.4,<br>20.77 | 20.23,<br>21.1.11.28,<br>21.1.11.37,<br>21.1.5.20 | 21.1.7.9,<br>21.1.10.4,<br>21.1.11.11    |
| 1.6 Bösartige Neubildungen in der Familienanamnese                          | Neoplasie                               | 20.10                                       |                                                   |                                          |
| 1.7 Dysmorphiezeichen                                                       | Fehlbildung                             | 20.3                                        | 21.1.11.2                                         |                                          |
| 1.8 Exsikkose                                                               | Flüssigkeitsstörung, Flüssigkeitsmangel | 20.20                                       | 20.117                                            | 21.1.3.19                                |
| 1.9 Fieber                                                                  |                                         | 20.27                                       | 16.5.15,<br>16.10.1                               | 17.6.1                                   |
| 1.10 Hyperhydratation                                                       | Flüssigkeitsstörung                     | 21.1.3.19                                   |                                                   |                                          |
| 1.11 Hypothermie                                                            | Unterkühlung                            | 21.1.8.1                                    |                                                   |                                          |
| 1.12 Ikterus                                                                | Gelbsucht                               | 16.3.26                                     | 20.34                                             |                                          |
| 1.13 Leistungsminderung                                                     | Schwäche                                | 20.63                                       |                                                   |                                          |
| 1.14 Nachtschweiß                                                           | Schwitzen                               | 20.118                                      |                                                   |                                          |
| 1.15 Ödeme                                                                  |                                         | 20.36                                       |                                                   |                                          |
| 1.16 Schüttelfrost                                                          |                                         | x                                           |                                                   |                                          |
| 1.17 Schwellung bzw. Verfärbung von Gliedmaßen                              | Schwarzverfärbung, Schwellung           | 14b.5.8                                     | 20.95                                             |                                          |
| 1.18 Umschriebene Gewebeschwellung                                          | Schwellung                              | 13.3.6.5,<br>14b.2.4,<br>17.6.1.5,<br>20.61 | 20.78,<br>21.1.5.21,<br>21.1.7.10,<br>21.1.10.5   | 21.1.11.11,<br>21.1.11.28,<br>21.1.11.37 |
| 1.19 Vielzahl bzw. Wechsel von Beschwerden                                  | Multi                                   | 20.64                                       |                                                   |                                          |
| 1.20 Wärmeintoleranz                                                        | Temperatur                              | 20.2                                        | 21.1.11.3                                         |                                          |
| <b>2.0 Haut, Unterhaut, Haare, Schleimhaut, Lymphknoten</b>                 |                                         | 20.118,                                     | 21.1.3.20                                         |                                          |
| 2.1 Atrophie der Haut                                                       |                                         | 16.5.16                                     | 16.10.2                                           | 17.6.2                                   |
| 2.2 Blasenbildung der Haut bzw. Schleimhaut                                 | Blase                                   | 20.21                                       |                                                   |                                          |
| 2.3 Blässe                                                                  |                                         | 20.22                                       |                                                   |                                          |
| 2.4 Ekzem                                                                   |                                         | 20.89                                       | 16.3.27                                           |                                          |
| 2.5 Erythem                                                                 | Rötung                                  | 20.81                                       |                                                   |                                          |
| 2.6 Exanthem                                                                |                                         | 20.81                                       |                                                   |                                          |
| 2.7 Haarausfall                                                             | Alopezie                                | 21.1.8.43                                   |                                                   |                                          |
| 2.8 Hämatom                                                                 | Flecken auf der Haut                    | 20.57                                       |                                                   |                                          |
| 2.9 Hautblutungen                                                           | Flecken auf der Haut                    | 20.29                                       | 14b.5.9                                           |                                          |
| 2.10 Hautemphysem                                                           |                                         | 13.3.6.6,<br>14b.2.5,<br>17.6.1.6,<br>20.79 | 21.1.7.11,<br>21.1.10.6,<br>21.1.11.11            | 21.1.11.28,<br>21.1.11.37,<br>21.1.5.22  |
| 2.11 Hautschuppung                                                          | Schuppig                                | 20.89                                       |                                                   |                                          |
| 2.12 Hyperhidrose                                                           | Schwitzen                               | 20.118                                      | 21.1.11.4                                         |                                          |
| 2.13 Hypertrichose bzw. Hirsutismus                                         | Haare                                   | 20.112                                      | 20.119                                            | 21.1.3.21                                |
| 2.14 Hypohidrose                                                            |                                         | 16.5.17                                     | 16.10.3                                           | 17.6.3                                   |
| 2.15 Lokalisierte Schwellung, Raumforderung, Knoten der Haut bzw. Unterhaut |                                         | 20.61                                       |                                                   |                                          |
| 2.16 Lymphknotenvergrößerung                                                |                                         | 20.92                                       |                                                   |                                          |
| 2.17 Mamillare Hautveränderungen                                            |                                         | 16.3.28                                     |                                                   |                                          |
| 2.18 Nagelanomalien bzw. Nagelveränderungen                                 | Nagel, Nägel                            | 20.112                                      |                                                   |                                          |
| 2.19 Papelbildung                                                           |                                         | 20.29                                       |                                                   |                                          |
| 2.20 Photosensibilität der Haut                                             |                                         | x                                           |                                                   |                                          |
| 2.21 Pigmentierungsstörungen                                                | Flecken auf der Haut                    | 20.29                                       |                                                   |                                          |
| 2.22 Pruritus                                                               |                                         | 20.52                                       | 14b.5.10                                          |                                          |
| 2.23 Pustelbildung                                                          |                                         | 13.3.6.7,<br>14b.2.6,<br>17.6.1.7,<br>20.80 | 20.29,<br>21.1.7.12,<br>21.1.10.7,<br>21.1.11.11  | 21.1.11.28,<br>21.1.11.37,<br>21.1.5.23  |
| 2.24 Schwellung bzw. Rötung der Hand                                        |                                         | 20.95                                       |                                                   |                                          |
| 2.25 Teleangiektasien                                                       |                                         | 21.1.11.5                                   |                                                   |                                          |
| 2.26 Trockenheit der Haut                                                   |                                         | 20.89                                       | 20.120                                            | 21.1.3.22                                |
| 2.27 Ulkus der Haut bzw. Schleimhaut                                        | trocken                                 | 20.120                                      | 16.5.18,<br>16.10.4                               | 17.6.4                                   |
| 2.28 Urtikaria                                                              | Ulcera                                  | 20.29                                       | 20.61                                             | 21.1.8.40                                |
| 2.29 Veränderungen des Hautreliefs                                          | Haut                                    | 20.89                                       | 20.91                                             | 20.120                                   |
| 2.30 Vermehrte Hornbildung                                                  |                                         | 16.3.29                                     |                                                   |                                          |
| 2.31 Wunde                                                                  | Wund                                    | 20.120                                      | 20.121                                            |                                          |
| 2.32 Wundheilungsstörung                                                    |                                         | x                                           |                                                   |                                          |
| <b>3.0 Kreislaufsystem</b>                                                  |                                         |                                             |                                                   |                                          |
| 3.1 Angina pectoris                                                         |                                         | 20.107                                      | 16.5.43                                           |                                          |
| 3.2 Claudicatio intermittens                                                | pAVK                                    | 14b.5.11                                    | 20.86,<br>20.120                                  | 21.1.1.4,<br>21.1.3.6                    |
| 3.3 Einstufsstauung                                                         |                                         | 13.3.6.8,<br>14b.2.7,<br>17.6.1.8,<br>20.81 | 21.1.7.13,<br>21.1.10.8,<br>21.1.11.11            | 21.1.11.28,<br>21.1.11.37,<br>21.1.5.24  |
| 3.4 Erhöhter Blutdruck                                                      | Hypertonie                              | 13.3.8.6,<br>13.3.9.1                       | 21.1.1.17,<br>21.1.1.20                           | 16.5.46                                  |
| 3.5 Kreislaufstillstand                                                     |                                         | 21.1.11.6                                   |                                                   |                                          |
| 3.6 Niedriger Blutdruck                                                     |                                         | 13.3.8                                      | 20.121                                            | 21.1.3.23                                |
| 3.7 Pulslose Extremität                                                     | Embolie                                 | 21.1.1.3                                    | 16.5.19,<br>16.10.5                               | 17.6.5                                   |



|                                                                       |                        |                                                             |                                                   |                                                        |
|-----------------------------------------------------------------------|------------------------|-------------------------------------------------------------|---------------------------------------------------|--------------------------------------------------------|
| 3.8 Schock                                                            |                        | 13.3.8.8,<br>17.6.1.5                                       | 20.22,<br>21.1.1.2                                |                                                        |
| 3.9 Störungen des Herzrhythmus                                        |                        | 16.3.12,<br>16.5.45                                         | 17.6.1                                            | 20.47,<br>21.1.1.13                                    |
| 3.10 Sturzfall                                                        |                        | 21.1.1.16                                                   | 16.3.30                                           |                                                        |
| 3.11 Synkope bzw. Kollaps                                             |                        | 21.1.1.16                                                   | 20.56                                             |                                                        |
| 3.12 Zyanose                                                          |                        | 20.124                                                      |                                                   |                                                        |
| <b>4.0 Atmungssystem</b>                                              |                        |                                                             |                                                   |                                                        |
| 4.1 Abnormes Sputum                                                   |                        | x                                                           |                                                   |                                                        |
| 4.2 Aspiration                                                        |                        | 21.1.4.2                                                    | 21.1.11.26                                        | 14b.5.12                                               |
| 4.3 Atemnot                                                           |                        | 13.3.6.9,<br>14b.2.8,<br>16.10.11,<br>17.6.1.2,<br>17.6.1.9 | 20.82,<br>20.7,<br>21.1.7.14,<br>21.1.10.9        | 21.1.11.11,<br>21.1.11.28,<br>21.1.11.37,<br>21.1.5.25 |
| 4.4 Atemrhythmusstörungen                                             |                        | 20.7                                                        | 21.1.4.16                                         |                                                        |
| 4.5 Atemstillstand                                                    |                        | 17.5.4                                                      | 21.1.11.7                                         |                                                        |
| 4.6 Behinderte Nasenatmung                                            |                        | 20.16                                                       | 20.122,                                           | 21.1.3.24                                              |
| 4.7 Bradypnoe                                                         |                        | 20.7                                                        | 16.5.20,<br>16.10.6                               | 17.6.6                                                 |
| 4.8 Fassthorax                                                        |                        | x                                                           |                                                   |                                                        |
| 4.9 Giemen                                                            |                        | x                                                           |                                                   |                                                        |
| 4.10 Hämoptoe                                                         | Husten                 | 20.49                                                       | 16.3.31                                           |                                                        |
| 4.11 Hämoptyse                                                        |                        | 20.49                                                       |                                                   |                                                        |
| 4.12 Husten                                                           |                        | 20.49                                                       | 16.5.50                                           | 16.10.11                                               |
| 4.13 Hyperventilation                                                 |                        | 20.7                                                        | 20.56                                             | 20.106                                                 |
| 4.14 Inverse Atmung                                                   |                        | x                                                           |                                                   |                                                        |
| 4.15 Orthopnoe                                                        |                        | 14b.5.13                                                    |                                                   |                                                        |
| 4.16 Paradoxe Atmung                                                  |                        | 13.3.6.10,<br>14b.2.9,<br>17.6.1.10,<br>20.83               | 21.1.7.15,<br>21.1.10.10,<br>21.1.11.11           | 21.1.11.28,<br>21.1.11.37,<br>21.1.5.26                |
| 4.17 Pfeifende Atmung                                                 |                        | x                                                           |                                                   |                                                        |
| 4.18 Rasselgeräusche                                                  |                        | 21.1.11.8                                                   |                                                   |                                                        |
| 4.19 Schlafapnoe                                                      |                        | 20.123,<br>20.63                                            | 21.1.4.16                                         | 21.1.3.25                                              |
| 4.20 Schnarchen                                                       |                        | 16.5.21                                                     | 16.10.7                                           | 17.6.7                                                 |
| 4.21 Singultus                                                        |                        | x                                                           |                                                   |                                                        |
| 4.22 Stöhnende Atmung ("Knorksen")                                    |                        | x                                                           |                                                   |                                                        |
| 4.23 Stridor                                                          |                        | 16.3.32                                                     |                                                   |                                                        |
| 4.24 Tachypnoe                                                        |                        | x                                                           |                                                   |                                                        |
| 4.25 Trichterbrust                                                    |                        | x                                                           |                                                   |                                                        |
| 4.26 Trommelschlegelfinger                                            |                        | x                                                           |                                                   |                                                        |
| 4.27 Uhrglasnägel                                                     |                        | x                                                           |                                                   |                                                        |
| <b>5.0 Verdauungssystem</b>                                           |                        | 14b.5.14                                                    |                                                   |                                                        |
| 5.1 Aufstoßen                                                         |                        | 13.3.6.11,<br>14b.2.10,<br>17.6.1.11,<br>20.84              | 21.1.7.16,<br>21.1.10.11,<br>21.1.11.11           | 21.1.11.28,<br>21.1.11.37,<br>21.1.5.27                |
| 5.2 Belegte Zunge                                                     |                        | x                                                           |                                                   |                                                        |
| 5.3 Blutiger Stuhl                                                    |                        | 20.77                                                       | 21.1.11.9                                         |                                                        |
| 5.4 Defäkationsschmerzen                                              |                        | 20.124                                                      | 21.1.3.26                                         |                                                        |
| 5.5 Diarrhoe                                                          | Stuhlgang              | 16.5.22,<br>16.10.8                                         | 17.6.8                                            | 20.113                                                 |
| 5.6 Erbrechen                                                         |                        | 20.110                                                      | 16.5.53                                           |                                                        |
| 5.7 Foetor ex ore                                                     | Geruch                 | 20.11                                                       |                                                   |                                                        |
| 5.8 Globusgefühl                                                      |                        | 16.3.33                                                     |                                                   |                                                        |
| 5.9 Hämatemesis                                                       |                        | 20.110                                                      |                                                   |                                                        |
| 5.10 Hypersalivation                                                  |                        | x                                                           |                                                   |                                                        |
| 5.11 Miserere                                                         |                        | x                                                           |                                                   |                                                        |
| 5.12 Mundtrockenheit                                                  |                        | x                                                           |                                                   |                                                        |
| 5.13 Obstipation                                                      |                        | 21.1.7.41                                                   | 14b.5.15                                          | 20.113                                                 |
| 5.14 Perianale Blutung                                                |                        | 13.3.6.12,<br>14b.2.11,<br>17.6.1.12,<br>20.85              | 20.77,<br>21.1.7.17,<br>21.1.10.12,<br>21.1.11.11 | 21.1.11.28,<br>21.1.11.37,<br>21.1.5.28                |
| 5.15 Regurgitation von Speisebrei                                     |                        | x                                                           |                                                   |                                                        |
| 5.16 Schluckstörungen                                                 |                        | 20.84                                                       | 16.10.10                                          | 21.1.11.10                                             |
| 5.17 Sodbrennen                                                       |                        | 16.5.51,<br>16.4.64,                                        | 16.4.58,<br>20.125                                | 21.1.7.10,<br>21.1.3.27                                |
| 5.18 Stuhlinkontinenz                                                 |                        | 21.1.7.36                                                   | 16.5.23,<br>16.10.9                               | 17.6.9                                                 |
| 5.19 Teerstuhl                                                        |                        | 20.77                                                       | 21.1.7.10                                         | 21.1.3.27                                              |
| 5.20 Übelkeit                                                         |                        | 20.110                                                      | 16.5.53                                           |                                                        |
| 5.21 Veränderungen der Stuhlgewohnheiten bzw. der Stuhlbeschaffenheit |                        | 20.113                                                      | 16.3.34                                           |                                                        |
| 5.22 Vorfall von Mastdarm bzw. After                                  |                        | x                                                           |                                                   |                                                        |
| 5.23 Zungenbrennen                                                    |                        | x                                                           |                                                   |                                                        |
| <b>6.0 Abdomen</b>                                                    |                        |                                                             |                                                   |                                                        |
| 6.1 Abdominelle Abwehrspannung                                        | Abdomen                | 21.1.7.5                                                    |                                                   |                                                        |
| 6.2 Aszites                                                           | Schwellung des Bauches | 13.3.10                                                     | 14b.5.16                                          |                                                        |
| 6.3 Hepatomegalie                                                     |                        | 13.3.6.13,<br>14b.2.12,<br>17.6.1.13,<br>20.86              | 21.1.7.18,<br>21.1.10.13,<br>21.1.11.11           | 21.1.11.28,<br>21.1.11.37,<br>21.1.5.29                |
| 6.4 Leistenschwellung                                                 | Schwellung             | 20.96                                                       |                                                   |                                                        |
| 6.5 Meteorismus bzw. Blähungen                                        |                        | 20.93                                                       | 21.1.11.11                                        |                                                        |
| 6.6 Resistenz im Abdomen                                              | Schwellung             | 20.105,<br>20.126                                           | 21.1.7.5,<br>21.1.3.28                            |                                                        |
| 6.7 Splenomegalie                                                     |                        | 16.5.24                                                     | 17.6.10                                           | 16.10.10                                               |
| 6.8 Störungen der Peristaltik                                         | Motilität              | 13.3.10                                                     |                                                   |                                                        |
| <b>7.0 Ernährungsstörungen</b>                                        |                        |                                                             |                                                   |                                                        |

|                                                               |                               |                                                           |                                                    |                                                       |
|---------------------------------------------------------------|-------------------------------|-----------------------------------------------------------|----------------------------------------------------|-------------------------------------------------------|
| 7.1 Abneigung gegen bestimmte Nahrungsmittel                  |                               | 16.3.35                                                   | 20.5,<br>20.69                                     | 21.1.7.29                                             |
| 7.2 Anorexie bzw. Untergewicht                                |                               | 21.1.3.28                                                 |                                                    |                                                       |
| 7.3 Appetitlosigkeit                                          |                               | 20.5                                                      |                                                    |                                                       |
| 7.4 Fehl-Ernährung                                            |                               | 20.111                                                    | 21.1.3.28                                          |                                                       |
| 7.5 Gedeihstörung                                             |                               | 20.119                                                    | 20.26                                              | 21.1.3.11                                             |
| 7.6 Nahrungsverweigerung                                      | Appetitlosigkeit              | 20.5                                                      | 14b.5.17                                           |                                                       |
| 7.7 Polydipsie                                                |                               | 13.3.6.14,<br>14b.2.13, 17.6.1.14,<br>20.87               | 21.1.7.19,<br>21.1.10.14,<br>21.1.11.11,           | 21.1.11.28,<br>21.1.11.37,<br>21.1.5.30               |
| 7.8 Polyphagie bzw. Essattacken                               | Gewichtszunahme, Binge-Eating | 20.43                                                     |                                                    |                                                       |
| 7.9 Übergewicht                                               | Gewichtszunahme               | 20.43                                                     | 21.1.11.12                                         |                                                       |
| 7.10 Unverträglichkeit für bestimmte Nahrungsmittel           |                               | 20.69                                                     | 20.127                                             | 21.1.3.29                                             |
| <b>8.0 Stoffwechsel, Endokrinium, Immunsystem</b>             |                               |                                                           |                                                    |                                                       |
| 8.1 Abnormer Körpergeruch                                     |                               | 20.11                                                     |                                                    |                                                       |
| 8.2 Akromegalie-Symptome                                      |                               | x                                                         |                                                    |                                                       |
| 8.3 Allergische Reaktion                                      | allergisch                    | 16.3.36,<br>16.5.41                                       | 20.52,<br>20.81                                    | 21.1.4.23,<br>21.1.8.10                               |
| 8.4 Galaktorrhoe                                              |                               | x                                                         |                                                    |                                                       |
| 8.5 Gynäkomastie                                              |                               | 21.1.3.16                                                 |                                                    |                                                       |
| 8.6 Infektheigung                                             |                               | 21.1.5.12                                                 |                                                    |                                                       |
| 8.7 Libidoverlust                                             |                               | 20.103                                                    |                                                    |                                                       |
| 8.8 Schilddrüsenvergrößerung                                  | Struma                        | 21.1.3.1                                                  | 14b.5.18                                           |                                                       |
| 8.9 Stammfettsucht                                            | Cushing                       | 13.3.6.15,<br>14b.2.14,<br>17.6.1.15,<br>20.88            | 21.1.7.20,<br>21.1.10.15,<br>21.1.11.11            | 21.1.11.28,<br>21.1.11.37,<br>21.1.5.31,<br>21.1.3.21 |
| <b>9.0 Skelett, Bewegungssystem</b>                           |                               |                                                           |                                                    |                                                       |
| 9.1 Abnorme Beweglichkeit                                     | Bewegungsstörung              | 20.19,<br>20.100                                          | 21.1.11.13                                         | 21.1.10.33                                            |
| 9.2 Frakturheilung                                            |                               | 20.128                                                    | 21.1.3.30                                          |                                                       |
| 9.3 Gangstörung                                               | Gehstörung                    | 20.33                                                     | 16.5.26,<br>16.10.12                               | 17.6.12                                               |
| 9.4 Gelenkinstabilität                                        |                               | 21.1.2.18                                                 |                                                    |                                                       |
| 9.5 Gelenkschwellung                                          |                               | 20.35                                                     |                                                    |                                                       |
| 9.6 Gelenksteife                                              |                               | 20.100                                                    | 16.3.37                                            |                                                       |
| 9.7 Haltungsfehler                                            |                               | x                                                         |                                                    |                                                       |
| 9.8 Kieferklemme bzw. Kiefersperre                            |                               | x                                                         |                                                    |                                                       |
| 9.9 Morgensteifigkeit                                         |                               | 20.100                                                    |                                                    |                                                       |
| 9.10 Muskelatrophie                                           |                               | 13.2.1                                                    | 21.1.10.35                                         |                                                       |
| 9.11 Muskelhypertrophie                                       |                               | 13.2.1                                                    | 14b.5.19                                           |                                                       |
| 9.12 Muskelkontraktur                                         |                               | 13.3.5,<br>13.3.6.16,<br>114b.2.15,<br>17.6.1.16<br>20.89 | 21.1.7.21,<br>21.1.10.16,<br>21.1.11.11,<br>20.89  | 21.1.11.28,<br>21.1.11.37,<br>21.1.5.32               |
| 9.13 Skelettdeformitäten                                      |                               | 21.1.2.13                                                 | 21.1.2                                             | 16.4.52                                               |
| <b>10.0 Harntrakt</b>                                         |                               |                                                           |                                                    |                                                       |
| 10.1 Abnormer Hamgeruch                                       |                               | 20.129                                                    | 21.1.3.31                                          |                                                       |
| 10.2 Anurie                                                   | Urin                          | 20.117,<br>20.62                                          | 16.5.27,<br>16.10.13                               | 17.6.13                                               |
| 10.3 Ausfluss aus der Harnröhre                               | Ausfluss                      | 20.39                                                     |                                                    |                                                       |
| 10.4 Erschwerte Miktion                                       | Urin                          | 20.62                                                     |                                                    |                                                       |
| 10.5 Hämaturie                                                |                               | 20.45                                                     | 16.3.38                                            |                                                       |
| 10.6 Harninkontinenz                                          |                               | 20.62                                                     |                                                    |                                                       |
| 10.7 Harntransportstörungen                                   |                               | 20.117                                                    |                                                    |                                                       |
| 10.8 Harnverfärbung bzw. -trübung                             |                               | 20.45                                                     |                                                    |                                                       |
| 10.9 Harnverhaltung                                           |                               | 20.117                                                    |                                                    |                                                       |
| 10.10 Nykturie                                                |                               | 14b.5.20                                                  |                                                    |                                                       |
| 10.11 Oligurie                                                |                               | 13.3.6.17,<br>14b.2.16,<br>17.6.1.17,<br>20.90            | 20.117,<br>21.1.7.22,<br>21.1.10.17,<br>21.1.11.11 | 21.1.11.28,<br>21.1.11.37,<br>21.1.5.33               |
| 10.12 Pollakisurie                                            |                               | 20.62                                                     |                                                    |                                                       |
| 10.13 Polyurie                                                |                               | 20.62                                                     | 21.1.11.15                                         |                                                       |
| 10.14 Schaumiger Harn                                         |                               | 20.130                                                    | 21.1.3.32                                          |                                                       |
| 10.15 Schmerzhaftige Miktion                                  |                               | 16.5.28,<br>16.10.14                                      | 17.6.14                                            | 20.62                                                 |
| <b>11.0 Genitalorgane allgemein</b>                           |                               |                                                           |                                                    |                                                       |
| 11.1 Fertilitätsstörungen                                     |                               | 21.1.6.38                                                 |                                                    |                                                       |
| 11.2 Genitalblutungen                                         |                               | 16.3.39                                                   |                                                    |                                                       |
| 11.3 Genitale Fehlbildungen                                   |                               | 20.3                                                      | 21.1.11.30                                         |                                                       |
| 11.4 Sterilität                                               |                               | 21.1.6.38                                                 |                                                    |                                                       |
| <b>12.0 Männliche Genitalorgane</b>                           |                               |                                                           |                                                    |                                                       |
| 12.1 Hämospemie                                               |                               | x                                                         |                                                    |                                                       |
| 12.2 Hodenfehlage                                             |                               | 21.1.6.8                                                  | 14b.5.21                                           |                                                       |
| 12.3 Phimose bzw. Paraphimose                                 |                               | 13.3.6.18,<br>14b.2.17,<br>17.6.1.18,<br>20.91            | 21.1.7.23,<br>21.1.10.18,<br>21.1.11.11            | 21.1.11.28,<br>21.1.11.37,<br>21.1.5.34,<br>21.1.6.10 |
| 12.4 Schwellung im Skrotalbereich                             |                               | 20.94                                                     |                                                    |                                                       |
| 12.5 Störungen der Hodenentwicklung                           |                               | 21.1.11.16                                                |                                                    |                                                       |
| <b>13.0 Weibliche Genitalorgane</b>                           |                               |                                                           |                                                    |                                                       |
| 13.1 Amenorrhoe                                               | Menstruation                  | 20.131                                                    | 21.1.3.33                                          |                                                       |
| 13.2 Äußerer Vorfall der inneren weiblichen Geschlechtsorgane |                               | 16.5.29,<br>16.10.15                                      | 17.6.15                                            | 20.1                                                  |
| 13.3 Dysmenorrhoe                                             | Menstruation                  | 21.1.6.30                                                 |                                                    |                                                       |
| 13.4 Dyspareunie                                              |                               | 20.1                                                      |                                                    |                                                       |
| 13.5 Fluor genitalis                                          | Ausfluss                      | 20.38                                                     | 16.3.40                                            |                                                       |
| 13.6 Klimakterische Störungen                                 | Klimakterium                  | 21.1.6.29                                                 |                                                    |                                                       |

|                                                                 |                                                |                                                |                                                   |                                                        |
|-----------------------------------------------------------------|------------------------------------------------|------------------------------------------------|---------------------------------------------------|--------------------------------------------------------|
| 13.7 Mamma-Knoten                                               |                                                | 20.55                                          | 21.1.8.5                                          |                                                        |
| 13.8 Mastodynie                                                 | Schmerzen in der weiblichen Brust              | 20.87                                          |                                                   |                                                        |
| 13.9 Menstruationsstörungen                                     |                                                | 20.1                                           | 14b.5.22                                          |                                                        |
| 13.10 Mittelschmerz                                             |                                                | 13.3.6.19,<br>14b.2.18,<br>17.6.1.19,<br>20.92 | 20.01,<br>21.1.7.24,<br>21.1.10.19,<br>21.1.11.11 | 21.1.11.28,<br>21.1.11.37,<br>21.1.5.35                |
| 13.11 Pathologische Sekretion aus der Mamma                     |                                                | x                                              |                                                   |                                                        |
| 13.12 Prämatüre Menopause                                       |                                                | 21.1.6.29                                      | 21.1.11.17                                        |                                                        |
| 13.13 Prämenstruelles Syndrom                                   |                                                | 20.132                                         | 21.1.3.34                                         |                                                        |
| <b>14.0 Schwangerschaft, Wochenbett, Säuglingsalter</b>         |                                                | 16.5.30,                                       | 16.10.16                                          | 17.6.16                                                |
| 14.1 Abnormer Fontanellen-Tastbefund                            |                                                | x                                              |                                                   |                                                        |
| 14.2 Atemnot beim Neugeborenen                                  |                                                | 21.1.11.27                                     | 21.1.11.26                                        |                                                        |
| 14.3 Fruchtwasserabgang                                         |                                                | 21.1.11.4                                      | 16.3.41                                           |                                                        |
| 14.4 Frühgeburtlichkeit                                         |                                                | 20.78                                          |                                                   |                                                        |
| 14.5 Geburtsumögliche Lagen                                     |                                                | 21.1.11.2                                      |                                                   |                                                        |
| 14.6 Habituelle Aborte                                          |                                                | x                                              |                                                   |                                                        |
| 14.7 Neugeborenen-Hyperexzitabilität                            |                                                | 21.1.11                                        |                                                   |                                                        |
| 14.8 Perinatale Asphyxie                                        |                                                | 21.1.11                                        | 14b.5.23                                          |                                                        |
| 14.9 Postpartale Blutung                                        |                                                | 13.3.6.20,<br>14b.2.19,<br>17.6.1.20,<br>20.93 | 21.1.7.25,<br>21.1.10.20,<br>21.1.11.11           | 21.1.11.28,<br>21.1.11.37,<br>21.1.5.36,<br>21.1.11.11 |
| 14.10 Schwangerschaftsbedingte Beschwerden                      |                                                | 20.79                                          |                                                   |                                                        |
| 14.11 Stillschwierigkeiten                                      |                                                | 21.1.11.18                                     |                                                   |                                                        |
| 14.12 Verminderte Kindsbewegungen                               |                                                | 20.79                                          | 20.133                                            | 21.1.3.35                                              |
| 14.13 Vorzeitige Wehen                                          |                                                | 20.78                                          | 16.5.31,<br>16.10.17                              | 17.6.17                                                |
| <b>15.0 Wachstum, Entwicklung</b>                               |                                                |                                                |                                                   |                                                        |
| 15.1 Enkopresis                                                 |                                                | 21.1.6.43                                      |                                                   |                                                        |
| 15.2 Enuresis                                                   |                                                | 21.1.6.43                                      | 16.3.42                                           |                                                        |
| 15.3 Hochwuchs                                                  | Makrosomie, Wachstum, Großwuchs                | 20.119                                         |                                                   |                                                        |
| 15.4 Kleinwuchs                                                 | Wachstum, Kleinwuchs                           | 20.119                                         |                                                   |                                                        |
| 15.5 Makrozephalie                                              | Hydrozephalus                                  | 21.1.11.39                                     |                                                   |                                                        |
| 15.6 Mikrozephalie                                              | Hydrozephalus                                  | 21.1.11.39                                     |                                                   |                                                        |
| 15.7 Motorische Entwicklungsstörungen                           |                                                | 20.119                                         | 14b.5.24                                          |                                                        |
| 15.8 Psychische Entwicklungsstörungen                           |                                                | 13.3.6.21,<br>14b.2.20,<br>17.6.1.21,<br>20.94 | 21.1.7.26,<br>21.1.10.21,<br>21.1.11.11           | 21.1.11.28,<br>21.1.11.37,<br>21.1.5.37,<br>21.1.10.51 |
| 15.9 Sprachliche Entwicklungsstörungen                          |                                                | 20.101                                         |                                                   |                                                        |
| 15.10 Störungen der Pubertätsentwicklung                        |                                                | 20.119                                         | 21.1.11.19                                        |                                                        |
| 15.11 Wachstumsstörungen                                        |                                                | 20.119                                         | 20.134                                            | 21.1.3.36                                              |
| <b>16.0 Augen</b>                                               |                                                | 16.5.32                                        | 16.10.18                                          | 17.6.18                                                |
| 16.1 Abnorme Bindehautsekretion                                 |                                                | x                                              |                                                   |                                                        |
| 16.2 Blepharospasmus                                            |                                                | x                                              |                                                   |                                                        |
| 16.3 Doppelbilder                                               |                                                | 20.25                                          | 16.3.43                                           |                                                        |
| 16.4 Einschränkungen des Gesichtsfeldes                         | Sehstörung                                     | 20.25                                          |                                                   |                                                        |
| 16.5 Exophthalmus                                               |                                                | x                                              |                                                   |                                                        |
| 16.6 Flimmern vor den Augen                                     | Sehstörung                                     | 20.25                                          |                                                   |                                                        |
| 16.7 Fremdkörperbeschwerden des äußeren Auges                   |                                                | 16.3.9                                         |                                                   |                                                        |
| 16.8 Hornhauttrübung                                            | Keratokonjunktivitis                           | 21.1.9.18                                      | 14b.5.25                                          |                                                        |
| 16.9 Lichtscheu                                                 |                                                | 13.3.6.22,<br>14b.2.21,<br>17.6.1.22,<br>20.95 | 21.1.7.27,<br>21.1.10.22,<br>21.1.11.11           | 21.1.11.28,<br>21.1.11.37,<br>21.1.5.38                |
| 16.10 Lidschwellung                                             |                                                | x                                              |                                                   |                                                        |
| 16.11 Linsentrübung                                             | Katarakt                                       | 21.1.9.22                                      | 21.1.11.20                                        |                                                        |
| 16.12 Papillenschwellung                                        | Papille                                        | 21.1.9.28                                      | 20.135                                            | 21.1.3.37                                              |
| 16.13 Ptosis                                                    |                                                | 16.5.33                                        | 16.10.19                                          | 17.6.19                                                |
| 16.14 Pupillenstörungen                                         |                                                | x                                              |                                                   |                                                        |
| 16.15 Rotes Auge                                                |                                                | 20.80                                          |                                                   |                                                        |
| 16.16 Schielen                                                  | Strabismus                                     | 20.25                                          | 16.4.22                                           | 16.3.44                                                |
| 16.17 Sicca-Symptomatik                                         |                                                | 21.1.9.18                                      |                                                   |                                                        |
| 16.18 Sonnenuntergangsphänomen                                  |                                                | x                                              |                                                   |                                                        |
| 16.19 Störung des Sehvermögens bzw. Blindheit                   | Sehstörung                                     | 20.25                                          |                                                   |                                                        |
| 16.20 Störungen von Bewegungen bzw. der Beweglichkeit des Auges | Blickmotorik                                   | 13.3.2                                         |                                                   |                                                        |
| 16.21 Tränenträufeln                                            |                                                | 16.5.30                                        | 14b.5.26                                          |                                                        |
| 16.22 Verzerrtsehen                                             | Sehstörung                                     | 13.3.6.23,<br>14b.2.22,<br>17.6.1.23,<br>20.96 | 20.25,<br>21.1.7.28,<br>21.1.10.23,<br>21.1.11.11 | 21.1.11.28,<br>21.1.11.37,<br>21.1.5.39                |
| <b>17.0 Ohren</b>                                               |                                                |                                                |                                                   |                                                        |
| 17.1 Ausfluss bzw. Blutung aus dem Gehörgang                    |                                                | 20.13                                          | 21.1.11.21                                        |                                                        |
| 17.2 Gehörgangsfremdkörper                                      |                                                | 16.3.10                                        | 20.136                                            | 21.1.3.38                                              |
| 17.3 Störungen des Hörvermögens bzw. Taubheit                   | Hörstörung, Schallempfindungs-/leitungsstörung | 16.4.27,<br>16.10.7,<br>20.48                  | 16.5.34,<br>16.10.20,<br>17.6.20                  | 21.1.9.2,<br>21.1.9.3                                  |
| 17.4 Tinnitus                                                   |                                                | 21.1.9.6                                       |                                                   |                                                        |
| <b>18.0 Nase, Geruchs- und Geschmackssinn</b>                   |                                                |                                                |                                                   |                                                        |
| 18.1 Abnorme Nasensekretion                                     | Ausfluss aus der Nase                          | 20.14                                          | 16.3.45                                           |                                                        |
| 18.2 Borkenbildung in der Nase                                  |                                                | x                                              |                                                   |                                                        |
| 18.3 Epistaxis                                                  |                                                | 20.14                                          | 21.1.4.24                                         |                                                        |
| 18.4 Nasenfremdkörper                                           |                                                | 20.16                                          |                                                   |                                                        |
| 18.5 Störungen des Geruchs- bzw. Geschmackssinnes               |                                                | 13.3.2.29                                      |                                                   |                                                        |
| <b>19.0 Neurologische Störungen</b>                             |                                                | 14b.5.27                                       |                                                   |                                                        |

|                                                                               |                                                             |                                                 |                                                       |                                                        |
|-------------------------------------------------------------------------------|-------------------------------------------------------------|-------------------------------------------------|-------------------------------------------------------|--------------------------------------------------------|
| 19.1 Apraxie                                                                  | Bewegungsstörung                                            | 13.3.6.24,<br>14b.2.23,<br>17.6.1.24,<br>20.97  | 20.19,<br>20.33<br>21.1.7.29,<br>21.1.10.24           | 21.1.11.11,<br>21.1.11.28,<br>21.1.11.37,<br>21.1.5.40 |
| 19.2 Ataxie                                                                   |                                                             | x                                               |                                                       |                                                        |
| 19.3 Dystonien (generalisiert, fokal)                                         |                                                             | 21.1.11.22                                      |                                                       |                                                        |
| 19.4 Faszikulationen                                                          |                                                             | 20.137                                          | 21.1.3.39                                             |                                                        |
| 19.5 Hirntod                                                                  |                                                             | 16.5.35                                         | 16.10.21                                              | 17.6.21                                                |
| 19.6 Hyperkinesen                                                             | Bewegungsstörung                                            | 20.19                                           |                                                       |                                                        |
| 19.7 Hypokinese bzw. Hypomimie                                                | Bewegungsstörung                                            | 20.19                                           |                                                       |                                                        |
| 19.8 Krampfanfall                                                             |                                                             | 20.58                                           | 16.3.46                                               | 21.1.10.19                                             |
| 19.9 Lähmungen                                                                |                                                             | 20.60                                           |                                                       |                                                        |
| 19.10 Liquorrhoe                                                              |                                                             | 20.14                                           |                                                       |                                                        |
| 19.11 Meningismus                                                             |                                                             | 20.68                                           |                                                       |                                                        |
| 19.12 Muskelkrämpfe                                                           |                                                             | 21.1.10.20                                      |                                                       |                                                        |
| 19.13 Muskuläre Hypertonie                                                    |                                                             | 14b.5.28                                        |                                                       |                                                        |
| 19.14 Muskuläre Hypotonie                                                     | Muskelschwäche                                              | 13.3.6.25,<br>14b.2.24,<br>20.98,<br>20.66      | 17.6.1.25,<br>21.1.7.30,<br>21.1.10.25,<br>21.1.11.11 | 21.1.11.28,<br>21.1.11.37,<br>21.1.5.41                |
| 19.15 Myoklonien                                                              |                                                             | x                                               |                                                       |                                                        |
| 19.16 Opisthotonus                                                            |                                                             | 21.1.11.23                                      |                                                       |                                                        |
| 19.17 Reflexanomalien                                                         |                                                             | 20.138                                          | 21.1.3.40                                             |                                                        |
| 19.18 Rigor                                                                   |                                                             | 16.5.36,<br>16.10.22                            | 17.6.22                                               | 20.100                                                 |
| 19.19 Schwindel bzw. Gleichgewichtsstörungen                                  |                                                             | 16.5.16,<br>16.10.2                             | 20.97                                                 | 21.1.10.27                                             |
| 19.20 Sensibilitätsstörungen                                                  |                                                             | 20.106                                          |                                                       |                                                        |
| 19.21 Spastik                                                                 |                                                             | 20.100                                          | 16.3.47                                               |                                                        |
| 19.22 Tremor                                                                  |                                                             | 20.19                                           |                                                       |                                                        |
| <b>20.0 Sprache, Sprechen, Stimme</b>                                         |                                                             |                                                 |                                                       |                                                        |
| 20.1 Aphasie                                                                  |                                                             | 20.101                                          | 21.1.10.48                                            |                                                        |
| 20.2 Dysarthrophonie bzw. Dysglossie                                          |                                                             | x                                               |                                                       |                                                        |
| 20.3 Heiserkeit                                                               |                                                             | 14b.5.29                                        |                                                       |                                                        |
| 20.4 Mutismus                                                                 |                                                             | 13.3.6.26,<br>14b.2.25,<br>17.6.1.26,<br>20.99  | 21.1.7.31,<br>21.1.10.26,<br>21.1.11.11               | 21.1.11.28,<br>21.1.11.37,<br>21.1.5.42                |
| 20.5 Stottern bzw. Poltern                                                    | Sprachstörung                                               | 20.101                                          | 21.1.10.48                                            |                                                        |
| <b>21.0 Schmerzen</b>                                                         |                                                             |                                                 |                                                       |                                                        |
| 21.1 Akuter (plötzlicher) Schmerz                                             |                                                             | 16.5.13,<br>16.10.3                             | 20.139                                                | 21.1.3.41                                              |
| 21.2 Augenschmerzen                                                           |                                                             | 20.12                                           | 16.5.37,<br>16.10.23                                  | 17.6.23                                                |
| 21.3 Bauchschmerzen                                                           |                                                             | 20.15                                           |                                                       |                                                        |
| 21.4 Brustschmerzen                                                           | Thoraxschmerzen                                             | 20.107                                          |                                                       |                                                        |
| 21.5 Chronischer Schmerz                                                      | Schmerzen                                                   | 16.3.48                                         | 20.18,<br>20.75                                       | 21.1.2.44,<br>21.1.10.22                               |
| 21.6 Flankenschmerzen                                                         |                                                             | 20.28                                           |                                                       |                                                        |
| 21.7 Gelenkschmerzen                                                          |                                                             | 20.86                                           |                                                       |                                                        |
| 21.8 Gesichtsschmerz                                                          |                                                             | 20.40                                           |                                                       |                                                        |
| 21.9 Halsschmerzen                                                            |                                                             | 20.44                                           |                                                       |                                                        |
| 21.10 Hodenschmerzen                                                          |                                                             | 20.38                                           | 14b.5.30                                              |                                                        |
| 21.11 Ischialgie                                                              | Schmerzen der Extremitäten                                  | 13.3.6.27,<br>14b.2.26,<br>17.6.1.27,<br>20.100 | 20.82,<br>20.86,<br>21.1.7.32,<br>21.1.10.27          | 21.1.11.11,<br>21.1.11.28,<br>21.1.11.37,<br>21.1.5.43 |
| 21.12 Knochenschmerzen                                                        | Schmerzen der Extremitäten                                  | 20.86                                           | 20.88                                                 |                                                        |
| 21.13 Kolikartige Schmerzen                                                   | Bauchschmerzen                                              | 20.15                                           | 21.1.11.25                                            |                                                        |
| 21.14 Kopfschmerzen                                                           |                                                             | 20.57,<br>20.140                                | 21.1.10.21,<br>21.1.10.23                             | 21.1.3.42                                              |
| 21.15 Leistenschmerzen                                                        |                                                             | 16.5.38                                         | 16.10.24                                              | 17.6.24                                                |
| 21.16 Multilokuläre Schmerzen                                                 |                                                             | 20.37                                           |                                                       |                                                        |
| 21.17 Myalgie                                                                 |                                                             | 20.65                                           |                                                       |                                                        |
| 21.18 Nackenschmerzen                                                         |                                                             | 20.67                                           | 16.3.49                                               |                                                        |
| 21.19 Neuralgiforme Schmerzen                                                 |                                                             | 20.37                                           |                                                       |                                                        |
| 21.20 Ohrenschmerzen                                                          |                                                             | 20.70                                           |                                                       |                                                        |
| 21.21 Phantomschmerz                                                          |                                                             | 20.75                                           |                                                       |                                                        |
| 21.22 Radikulärer Schmerz                                                     | Rückenschmerzen                                             | 21.1.6.17                                       |                                                       |                                                        |
| 21.23 Rücken- bzw. Kreuzschmerzen                                             |                                                             | 20.82                                           | 14b.5.31                                              |                                                        |
| 21.24 Säuglingskolik                                                          | Bauchschmerzen                                              | 13.3.6.28,<br>14b.2.27,<br>17.6.1.28            | 20.101,<br>20.15,<br>21.1.7.33,<br>21.1.10.28         | 21.1.11.11,<br>21.1.11.28,<br>21.1.11.37,<br>21.1.5.44 |
| 21.25 Schmerzen bei der Atmung                                                | Thoraxschmerzen                                             | 20.107                                          |                                                       |                                                        |
| 21.26 Schmerzen im Bereich der Extremitäten                                   |                                                             | 20.86                                           | 21.1.11.26                                            |                                                        |
| 21.27 Schmerzen im Bereich von Becken bzw. Damm                               | Schmerzen im Bereich der Vulva                              | 20.141                                          | 21.16.17                                              | 21.1.3.43                                              |
| 21.28 Schmerzen in Zusammenhang mit der Nahrungsaufnahme                      |                                                             | 16.5.39                                         | 16.10.25                                              | 17.6.25                                                |
| 21.29 Tenesmen                                                                | Beschwerden beim Stuhlgang                                  | 20.113                                          |                                                       |                                                        |
| 21.30 Zahnschmerz                                                             | Schmerzen in Mund und Kiefer, Gesichtsschmerzen             | 20.88                                           | 20.40                                                 |                                                        |
| 21.31 Zentraler Schmerz                                                       | Phantomschmerz, generalisierter Schmerz, ohne org. Korrelat | 20.37                                           | 16.3.50                                               |                                                        |
| <b>22.0 Psychische Störungen, Verhaltensstörungen, psychosoziale Probleme</b> |                                                             |                                                 |                                                       |                                                        |
| 22.1 Aggressivität                                                            |                                                             | x                                               |                                                       |                                                        |

|                                                                   |                                      |                                                             |                                                        |                                                        |
|-------------------------------------------------------------------|--------------------------------------|-------------------------------------------------------------|--------------------------------------------------------|--------------------------------------------------------|
| 22.2 Angst bzw. Phobie                                            |                                      | 20.4,<br>20.47                                              | 16.5.22                                                | 21.1.10.53                                             |
| 22.3 Anhedonie                                                    |                                      | 14b.5.6                                                     |                                                        |                                                        |
| 22.4 Antriebsstörung                                              |                                      | 14b.5.7                                                     | 14b.5.32                                               |                                                        |
| 22.5 Aufmerksamkeits- bzw. Konzentrationsstörungen                |                                      | 13.3.6.29,<br>14b.5.3,<br>14b.2.28,<br>17.6.1.29,<br>20.102 | 21.1.7.34,<br>21.1.10.29,<br>21.1.11.11,<br>21.1.11.28 | 21.1.11.37,<br>21.1.5.45,<br>21.1.10.67,<br>21.1.10.53 |
| 22.6 Autoaggressives Verhalten                                    |                                      | 14b.5.10                                                    |                                                        |                                                        |
| 22.7 Bewusstseinsstörungen (qualitativ, quantitativ)              |                                      | 20.20,<br>14b.5.2                                           | 17.6.1.1                                               | 21.1.11.27                                             |
| 22.8 Bindungs- bzw. Beziehungsstörungen                           |                                      | 20.142                                                      | 21.1.3.44                                              |                                                        |
| 22.9 Denkstörungen                                                |                                      | 16.5.40                                                     | 16.10.26                                               | 17.6.26                                                |
| 22.10 Depressivität                                               |                                      | 16.5.21,<br>20.4,<br>20.5,<br>20.22,<br>20.32,<br>20.63     | 20.66,<br>20.71,<br>20.73,<br>20.75,<br>20.83,         | 20.98,<br>20.99,<br>20.102,<br>20.116,<br>21.1.10.45   |
| 22.11 Dissoziales Verhalten                                       |                                      | 21.1.10.61                                                  |                                                        |                                                        |
| 22.12 Dissoziation (Bewusstsein)                                  |                                      | 20.20                                                       | 16.3.51                                                |                                                        |
| 22.13 Ermüdungssyndrom                                            | Müdigkeit                            | 20.63                                                       |                                                        |                                                        |
| 22.14 Flashbacks                                                  | posttraumatisch                      | 21.1.10.55                                                  |                                                        |                                                        |
| 22.15 Gedächtnisstörungen                                         |                                      | 20.32                                                       |                                                        |                                                        |
| 22.16 Ich-Störungen                                               |                                      | 14b.5.5                                                     |                                                        |                                                        |
| 22.17 Innere Anspannung bzw. innere Unruhe                        |                                      | 14b.5.33                                                    |                                                        |                                                        |
| 22.18 Interessenverarmung                                         |                                      | 13.3.6.30,<br>14b.2.29,<br>17.6.1.30,<br>20.103             | 21.1.7.35,<br>21.1.10.30,<br>21.1.11.11                | 21.1.11.28,<br>21.1.11.37,<br>21.1.5.46                |
| 22.19 Katatonie                                                   | kataton                              | 21.1.10.66                                                  |                                                        |                                                        |
| 22.20 Konfabulation                                               |                                      | 21.1.11.28                                                  |                                                        |                                                        |
| 22.21 Körperschemastörung                                         |                                      | 20.143                                                      | 21.1.3.45                                              |                                                        |
| 22.22 Motorische Unruhe bzw. Bewegungsdrang                       | Bewegungsstörung,<br>restless leg    | 21.1.10.33                                                  | 16.5.41,<br>16.10.27                                   | 17.6.27                                                |
| 22.23 Orientierungsstörungen                                      |                                      | x                                                           |                                                        |                                                        |
| 22.24 Parathymie                                                  |                                      | x                                                           |                                                        |                                                        |
| 22.25 Probleme im sozialen Umfeld                                 | sozialer Rückzug,<br>Sozialverhalten | 16.3.52                                                     | 20.99                                                  | 21.1.10.50                                             |
| 22.26 Psychische Verstimmung                                      | Dysthymie                            | 20.63                                                       | 21.1.10.46                                             |                                                        |
| 22.27 Schlafstörungen                                             |                                      | 20.83                                                       | 21.1.10.62                                             |                                                        |
| 22.28 Schul- bzw. Lernschwierigkeiten                             |                                      | 20.26                                                       |                                                        |                                                        |
| 22.29 Sozialer Rückzug                                            |                                      | 20.99                                                       |                                                        |                                                        |
| 22.30 Stimmungsschwankungen                                       | Zyklothymia                          | 21.1.10.44                                                  | 14b.5.34                                               |                                                        |
| 22.31 Störungen der Krankheitsbewältigung einschl. Non-Compliance |                                      | 12.19.10,<br>14b.2.30,<br>17.6.1.31,<br>20.104              | 21.1.7.36,<br>21.1.10.31,<br>21.1.11.11,<br>21.1.11.28 | 21.1.11.37,<br>21.1.5.47,<br>13.3.6.31                 |
| 22.32 Störungen der Sexualität (Funktion, Verhalten, Identität)   |                                      | 20.103                                                      |                                                        |                                                        |
| 22.33 Stupor                                                      |                                      | x                                                           | 21.1.11.29                                             |                                                        |
| 22.34 Suizidalität                                                |                                      | 14c.3.2,<br>14b.5                                           | 15.12.2,<br>18.3.4                                     | 21.1.3.46,<br>20.144                                   |
| 22.35 Tagesschläfrigkeit                                          | Müdigkeit                            | 20.71,<br>20.51,<br>20.63                                   | 16.5.42,<br>16.10.28                                   | 17.6.28,<br>21.1.10.72                                 |
| 22.36 Tics bzw. Stereotypien                                      |                                      | 20.123                                                      | 21.1.10.68                                             |                                                        |
| 22.37 Verlangsamung bzw. herabgesetztes Reaktionsvermögen         |                                      | 20.116                                                      |                                                        |                                                        |
| 22.38 Verwirrtheit                                                | Verwirrung, Delir                    | 20.20                                                       | 16.3.2                                                 | 16.3.53                                                |
| 22.39 Wahnsymptome                                                | Wahn                                 | 20.24                                                       |                                                        |                                                        |
| 22.40 Wahrnehmungsstörungen bzw. Halluzinationen                  |                                      | 20.24                                                       |                                                        |                                                        |
| 22.41 Zwangsgedanken bzw. Zwangshandlungen                        | Zwang                                | 16.5.22                                                     | 20.123                                                 | 21.1.10.57                                             |

#### 4.2. GK-2 Teil 2: Krankheitsbilder

| GK-2 Teil 2: Krankheitsbilder                                                                           | Synonym                                                                                                                                                                                                       | Abgleich mit NKLM      |                         |                           |
|---------------------------------------------------------------------------------------------------------|---------------------------------------------------------------------------------------------------------------------------------------------------------------------------------------------------------------|------------------------|-------------------------|---------------------------|
| <b>A00-A09 Infektiöse Darmkrankheiten</b>                                                               | Gastroenteritis                                                                                                                                                                                               | 20.15                  | 20.110                  | 21.1.7.28                 |
| <b>A15-A19 Tuberkulose</b>                                                                              | Pulmonale und extrapulmonale Tuberkulose                                                                                                                                                                      | 21.1.4.14              |                         |                           |
| <b>A20-A28 Bestimmte bakterielle Zoonosen</b>                                                           | Zoonose                                                                                                                                                                                                       | 21.1.10.32             | 20.61                   |                           |
| A20 Pest                                                                                                |                                                                                                                                                                                                               | x                      |                         |                           |
| A21 Tularämie                                                                                           |                                                                                                                                                                                                               | x                      |                         |                           |
| A22 Anthrax [Milzbrand]                                                                                 |                                                                                                                                                                                                               | x                      |                         |                           |
| A23 Brucellose                                                                                          |                                                                                                                                                                                                               | x                      |                         |                           |
| A26 Erysipeloid                                                                                         | Entzündung der Haut                                                                                                                                                                                           | 21.1.8.42              |                         |                           |
| A27 Leptospirose                                                                                        |                                                                                                                                                                                                               | x                      |                         |                           |
| A28 Sonstige bakterielle Zoonosen, anderenorts nicht klassifiziert                                      |                                                                                                                                                                                                               | 21.1.10.32             |                         |                           |
| <b>A30-A49 Sonstige bakterielle Krankheiten</b>                                                         |                                                                                                                                                                                                               |                        |                         |                           |
| A31 Infektion durch sonstige Mykobakterien                                                              |                                                                                                                                                                                                               | x                      |                         |                           |
| A32 Listeriose                                                                                          |                                                                                                                                                                                                               | x                      |                         |                           |
| A35 Sonstiger Tetanus                                                                                   |                                                                                                                                                                                                               | 21.1.2.30              |                         |                           |
| A36 Diphtherie                                                                                          |                                                                                                                                                                                                               | x                      |                         |                           |
| A37 Keuchhusten                                                                                         |                                                                                                                                                                                                               | 21.1.4.27              |                         |                           |
| A38 Scharlach                                                                                           |                                                                                                                                                                                                               | 21.1.8.39              | 20.81                   |                           |
| A39 Meningokokkeninfektion                                                                              | Meningitis                                                                                                                                                                                                    | 20.20,<br>20.24        | 20.68                   | 21.1.10.14,<br>21.1.11.19 |
| A40 Streptokokkensepsis                                                                                 | Sepsis neonatal                                                                                                                                                                                               | 21.1.11.19             | 21.1.1.1                |                           |
| A41 Sonstige Sepsis                                                                                     |                                                                                                                                                                                                               | 21.1.1.1               |                         |                           |
| A42 Aktinomykose                                                                                        |                                                                                                                                                                                                               | x                      |                         |                           |
| A44 Bartonellose                                                                                        |                                                                                                                                                                                                               | x                      |                         |                           |
| A46 Erysipel [Wundrose]                                                                                 |                                                                                                                                                                                                               | 21.1.8.42              | 20.81                   | 20.36                     |
| A48 Sonstige bakterielle Krankheiten, anderenorts nicht klassifiziert                                   | Staphylococcal scaled skin syndrome, toxisches Schocksyndrom                                                                                                                                                  | 21.1.8.18              |                         |                           |
| A49 Bakterielle Infektion nicht näher bezeichneter Lokalisation                                         |                                                                                                                                                                                                               | x                      |                         |                           |
| <b>A50-A64 Infektionen, die vorwiegend durch Geschlechtsverkehr übertragen werden</b>                   | Lues, Gonorrhoe, Chlamydien, Syphilis, Neurolyues                                                                                                                                                             | 21.1.6.35              | 21.1.6.33               | 21.1.6.34                 |
| <b>A65-A69 Sonstige Spirochätenkrankheiten</b>                                                          | Borreliose                                                                                                                                                                                                    | 21.1.2.40              |                         |                           |
| A69 Sonstige Spirochäteninfektionen                                                                     |                                                                                                                                                                                                               | 21.1.2.40              |                         |                           |
| <b>A70-A74 Sonstige Krankheiten durch Chlamydien</b>                                                    |                                                                                                                                                                                                               | 21.1.6.35              |                         |                           |
| <b>A75-A79 Rickettsiosen</b>                                                                            |                                                                                                                                                                                                               | x                      |                         |                           |
| <b>A80-A89 Virusinfektionen des Zentralnervensystems</b>                                                |                                                                                                                                                                                                               |                        |                         |                           |
| A80 Akute Poliomyelitis [Spinale Kinderlähmung]                                                         | Poliomyelitis                                                                                                                                                                                                 | 21.1.10.30             |                         |                           |
| A81 Atypische Virus-Infektionen des Zentralnervensystems                                                |                                                                                                                                                                                                               | x                      |                         |                           |
| A82 Tollwut [Rabies]                                                                                    |                                                                                                                                                                                                               | 21.1.10.31             |                         |                           |
| A83 Virusenzephalitis, durch Moskitos [Stechmücken] übertragen                                          |                                                                                                                                                                                                               | 21.1.10.14             |                         |                           |
| A84 Virusenzephalitis, durch Zecken übertragen                                                          | Sonstige Zoonosen (z.B. Toxoplasmose, Leishmaniose, Frühsommer-Meningoenzephalitis)                                                                                                                           | 21.1.10.14             | 21.1.10.32              |                           |
| A87 Virusmeningitis                                                                                     |                                                                                                                                                                                                               | 21.1.8.9               |                         |                           |
| <b>A90-A99 Durch Arthropoden übertragene Viruskrankheiten und virale hämorrhagische Fieber</b>          |                                                                                                                                                                                                               | x                      |                         |                           |
| <b>B00-B09 Virusinfektionen, die durch Haut- und Schleimhautläsionen gekennzeichnet sind</b>            | Herpesinfektionen und Reaktivierung, Herpesenzephalitis, Warzen, humane Papillomviren (HPV), Molluscum contagiosum, Erythema infectiosum (Ringelröteln), Drei-Tage-Fieber (Exanthema subitum), Röteln, Masern | 21.1.8.9,<br>21.1.8.29 | 21.1.8.31,<br>21.1.8.32 | 21.1.8.36,<br>21.1.8.37   |
| <b>B15-B19 Virushepatitis</b>                                                                           | Infektiöse Hepatitiden                                                                                                                                                                                        | 21.1.7.23              | 20.34                   | 21.1.7.44                 |
| <b>B20-B24 HIV-Krankheit [Humane Immundefizienz-Viruskrankheit]</b>                                     |                                                                                                                                                                                                               | 21.1.5.12              |                         |                           |
| B20 Infektiöse und parasitäre Krankheiten infolge HIV-Krankheit [Humane Immundefizienz-Viruskrankheit]  |                                                                                                                                                                                                               | 21.1.5.12              |                         |                           |
| B21 Bösartige Neubildungen infolge HIV-Krankheit [Humane Immundefizienz-Viruskrankheit]                 |                                                                                                                                                                                                               | 21.1.5.12              |                         |                           |
| B22 Sonstige näher bezeichnete Krankheiten infolge HIV-Krankheit [Humane Immundefizienz-Viruskrankheit] |                                                                                                                                                                                                               | 21.1.5.12              |                         |                           |
| B23 Sonstige Krankheitszustände infolge HIV-Krankheit [Humane Immundefizienz-Viruskrankheit]            |                                                                                                                                                                                                               | 21.1.5.12              |                         |                           |

|                                                                                                           |                                                                                                                             |            |           |  |
|-----------------------------------------------------------------------------------------------------------|-----------------------------------------------------------------------------------------------------------------------------|------------|-----------|--|
| B24 Nicht näher bezeichnete HIV-Krankheit [Humane Immundefizienz-Viruskrankheit]                          |                                                                                                                             | 21.1.5.12  |           |  |
| <b>B25-B34 Sonstige Viruskrankheiten</b>                                                                  |                                                                                                                             |            |           |  |
| B25 Zytomegalie                                                                                           |                                                                                                                             | x          |           |  |
| B26 Mumps                                                                                                 |                                                                                                                             | 21.1.7.30  |           |  |
| B27 Infektiöse Mononukleose                                                                               |                                                                                                                             | 21.1.5.7   |           |  |
| B30 Viruskonjunktivitis                                                                                   |                                                                                                                             | 21.1.9.16  |           |  |
| B34 Viruskrankheit nicht näher bezeichneter Lokalisation                                                  |                                                                                                                             | x          |           |  |
| <b>B35-B49 Mykosen</b>                                                                                    |                                                                                                                             | 20.112     |           |  |
| B35 Dermatophytase [Tinea]                                                                                | Dermatophytie                                                                                                               | 21.1.8.16  |           |  |
| B36 Sonstige oberflächliche Mykosen                                                                       |                                                                                                                             | 20.112     |           |  |
| B37 Kandidose                                                                                             |                                                                                                                             | 21.1.8.11  |           |  |
| B44 Aspergillose                                                                                          |                                                                                                                             | x          |           |  |
| B45 Kryptokokkose                                                                                         |                                                                                                                             | x          |           |  |
| <b>B50-B64 Protozoenkrankheiten</b>                                                                       | Sonstige Zoonosen (z.B. Toxoplasmose, Leishmaniose, Frühsommer-Meningoenzephalitis), Malaria                                | 21.1.10.32 | 21.1.5.4  |  |
| <b>B65-B83 Helminthosen</b>                                                                               | Wurmerkrankungen, Kolitis, Enterokolitis, Gastroenteritis                                                                   | 21.1.7.28  |           |  |
| B65 Schistosomiasis [Bilharziose]                                                                         |                                                                                                                             | 21.1.7.28  |           |  |
| B67 Echinokokkose                                                                                         |                                                                                                                             | 21.1.7.28  |           |  |
| B68 Taeniasis                                                                                             |                                                                                                                             | 21.1.7.28  |           |  |
| B69 Zystizerkose                                                                                          |                                                                                                                             | 21.1.7.28  |           |  |
| B77 Askaridose                                                                                            |                                                                                                                             | 21.1.7.28  |           |  |
| B80 Enterobiasis                                                                                          |                                                                                                                             | 21.1.7.28  |           |  |
| <b>B85-B89 Pedikulose [Läusebefall], Akaridose [Milben befall] und sonstiger Parasitenbefall der Haut</b> |                                                                                                                             |            |           |  |
| B85 Pedikulose [Läusebefall] und Phthiriasis [Filzläusebefall]                                            | Kopflaus- und Filzlausbefall                                                                                                | 21.1.8.34  |           |  |
| B86 Skabies                                                                                               |                                                                                                                             | 21.1.8.38  |           |  |
| <b>C00-C14 Bösartige Neubildungen der Lippe, der Mundhöhle und des Pharynx</b>                            | Entzündungen und Neoplasien (benigne, maligne) der Kopfspeicheldrüsen, Sialolithiasis, Benigne und maligne Mundhöhlentumore | 21.1.8.45  | 21.1.7.26 |  |
| <b>C15-C26 Bösartige Neubildungen der Verdauungsorgane</b>                                                |                                                                                                                             |            |           |  |
| C15 Bösartige Neubildung des Ösophagus                                                                    |                                                                                                                             | 21.1.7.11  |           |  |
| C16 Bösartige Neubildung des Magens                                                                       |                                                                                                                             | 21.1.7.16  |           |  |
| C17 Bösartige Neubildung des Dünndarmes                                                                   |                                                                                                                             | x          |           |  |
| C18 Bösartige Neubildung des Kolons                                                                       | Benigne, maligne Tumoren des Kolorektems                                                                                    | 21.1.7.19  |           |  |
| C19 Bösartige Neubildung am Rektosigmoid, Übergang                                                        |                                                                                                                             | 21.1.7.19  |           |  |
| C20 Bösartige Neubildung des Rektums                                                                      |                                                                                                                             | 21.1.7.19  |           |  |
| C21 Bösartige Neubildung des Anus und des Analkanals                                                      | Analkarzinom                                                                                                                | 21.1.7.48  |           |  |
| C22 Bösartige Neubildung der Leber und der intrahepatischen Gallengänge                                   | Benigne und primäre, sekundäre maligne Tumoren der Leber                                                                    | 21.1.7.21  |           |  |
| C23 Bösartige Neubildung der Gallenblase                                                                  | Benigne und maligne Tumoren der Gallenblase und der Gallengänge                                                             | 21.1.7.37  |           |  |
| C24 Bösartige Neubildung sonstiger und nicht näher bezeichneter Teil der Gallenwege                       |                                                                                                                             | 21.1.7.37  |           |  |
| C25 Bösartige Neubildung des Pankreas                                                                     | Benigne und maligne Tumoren des Pankreas                                                                                    | 21.1.7.38  |           |  |
| <b>C30-C39 Bösartige Neubildungen der Atmungsorgane und sonstiger intrathorakaler Organe</b>              |                                                                                                                             |            |           |  |
| C32 Bösartige Neubildung des Larynx                                                                       | malignome des Larynx                                                                                                        | 21.1.4.18  |           |  |
| C33 Bösartige Neubildung der Trachea                                                                      |                                                                                                                             | x          |           |  |
| C34 Bösartige Neubildung der Bronchien und der Lunge                                                      | Lungenkarzinom und pulmonale Metastasen                                                                                     | 21.1.4.17  |           |  |
| <b>C40-C41 Bösartige Neubildungen des Knochens und des Gelenkknorpels</b>                                 |                                                                                                                             |            |           |  |

|                                                                                                                         |                                                                                                                                                                                                                                            |                      |                      |                      |
|-------------------------------------------------------------------------------------------------------------------------|--------------------------------------------------------------------------------------------------------------------------------------------------------------------------------------------------------------------------------------------|----------------------|----------------------|----------------------|
| C40 Bösartige Neubildung des Knochens und des Gelenkknorpels der Extremitäten                                           |                                                                                                                                                                                                                                            | x                    |                      |                      |
| C41 Bösartige Neubildung des Knochens und des Gelenkknorpels sonstiger und nicht näher bezeichneter Lokalisation        |                                                                                                                                                                                                                                            | x                    |                      |                      |
| <b>C43-C44 Melanom und sonstige bösartige Neubildungen der Haut</b>                                                     |                                                                                                                                                                                                                                            |                      |                      |                      |
| C43 Bösartiges Melanom der Haut                                                                                         | Benigne und maligne Hauttumore                                                                                                                                                                                                             | 21.1.8.6             | 20.91                |                      |
| C44 Sonstige bösartige Neubildungen der Haut                                                                            |                                                                                                                                                                                                                                            | 21.1.8.6             |                      |                      |
| <b>C45-C49 Bösartige Neubildungen des mesothelialen Gewebes und des Weichteilgewebes</b>                                | Benigne und maligne Weichgewebstumore, Mesotheliom                                                                                                                                                                                         | 21.1.2.2             | 21.1.4.19            |                      |
| <b>C50 Bösartige Neubildung der Brustdrüse [Mamma]</b>                                                                  | Gutartige und bösartige Tumore der Mamma                                                                                                                                                                                                   | 21.1.8.5             |                      |                      |
| <b>C51-C58 Bösartige Neubildungen der weiblichen Genitalorgane</b>                                                      |                                                                                                                                                                                                                                            |                      |                      |                      |
| C51 Bösartige Neubildung der Vulva                                                                                      | Vulva- und Peniskarzinom                                                                                                                                                                                                                   | 21.1.6.42            |                      |                      |
| C52 Bösartige Neubildung der Vagina                                                                                     |                                                                                                                                                                                                                                            | x                    |                      |                      |
| C53 Bösartige Neubildung der Cervix uteri                                                                               | Zervixkarzinom und Dysplasie                                                                                                                                                                                                               | 21.1.6.26            |                      |                      |
| C54 Bösartige Neubildung des Corpus uteri                                                                               | Endometriumkarzinom                                                                                                                                                                                                                        | 21.1.6.24            |                      |                      |
| C56 Bösartige Neubildung des Ovars                                                                                      | Ovarialkarzinom                                                                                                                                                                                                                            | 21.1.6.25            |                      |                      |
| C57 Bösartige Neubildung sonstiger und nicht näher bezeichneter weiblicher Genitalorgane                                | Endometriumkarzinom                                                                                                                                                                                                                        | 21.1.6.24            |                      |                      |
| <b>C60-C63 Bösartige Neubildungen der männlichen Genitalorgane</b>                                                      | Prostatakarzinom, Benigne und maligne Hodentumore, Vulva- und Peniskarzinom                                                                                                                                                                | 21.1.6.42            | 21.1.6.3             | 21.1.6.41            |
| <b>C64-C68 Bösartige Neubildungen der Harnorgane</b>                                                                    | Benigne und maligne Tumore der Niere und des harnableitenden Systems                                                                                                                                                                       | 21.1.6.7             |                      |                      |
| <b>C69-C72 Bösartige Neubildungen des Auges, des Gehirns und sonstiger Teile des Zentralnervensystems</b>               |                                                                                                                                                                                                                                            |                      |                      |                      |
| C69 Bösartige Neubildung des Auges und der Augenanhangsgebilde                                                          | Retinoblastom                                                                                                                                                                                                                              | 21.1.9.29            |                      |                      |
| C71 Bösartige Neubildung des Gehirns                                                                                    | Zerebrale und spinale Tumoren und Metastasen                                                                                                                                                                                               | 21.1.10.13           |                      |                      |
| C72 Bösartige Neubildung des Rückenmarkes, der Hirnnerven und anderer Teile des Zentralnervensystems                    |                                                                                                                                                                                                                                            | 21.1.10.13           |                      |                      |
| <b>C73-C75 Bösartige Neubildungen der Schilddrüse und sonstiger endokriner Drüsen</b>                                   |                                                                                                                                                                                                                                            |                      |                      |                      |
| C73 Bösartige Neubildung der Schilddrüse                                                                                | Struma mit Knoten                                                                                                                                                                                                                          | 21.1.3.1             | 20.92                |                      |
| C74 Bösartige Neubildung der Nebenniere                                                                                 | Benigne und maligne Tumoren der Nebenniere                                                                                                                                                                                                 | 21.1.3.20            |                      |                      |
| <b>C76-C80 Bösartige Neubildungen ungenau bezeichneter, sekundärer und nicht näher bezeichneter Lokalisationen</b>      | Lungenkarzinom und pulmonale Metastasen, Zerebrale und spinale Tumoren und Metastasen                                                                                                                                                      | 21.1.4.17            | 21.1.10.13           |                      |
| <b>C81-C96 Bösartige Neubildungen des lymphatischen, blutbildenden und verwandten Gewebes</b>                           |                                                                                                                                                                                                                                            | 21.1.5.3             |                      |                      |
| C81 Hodgkin-Krankheit [Lymphogranulomatose]                                                                             | Lymphome (Hodgkin, Non-Hodgkin)                                                                                                                                                                                                            | 21.1.5.3             |                      |                      |
| C82 Follikuläres [noduläres] Non-Hodgkin-Lymphom                                                                        |                                                                                                                                                                                                                                            | 21.1.5.3             |                      |                      |
| C83 Diffuses Non-Hodgkin-Lymphom                                                                                        |                                                                                                                                                                                                                                            | 21.1.5.3             |                      |                      |
| C84 Periphere und kutane T-Zell-Lymphome                                                                                |                                                                                                                                                                                                                                            | 21.1.5.3             |                      |                      |
| C90 Plasmozytom und bösartige Plasmazellen-Neubildungen                                                                 |                                                                                                                                                                                                                                            | 21.1.5.3             |                      |                      |
| C91 Lymphatische Leukämie                                                                                               | Leukämie                                                                                                                                                                                                                                   | 21.1.5.2             |                      |                      |
| C92 Myeloische Leukämie                                                                                                 |                                                                                                                                                                                                                                            | 21.1.5.2             |                      |                      |
| C96 Sonstige und nicht näher bezeichnete bösartige Neubildungen des lymphatischen, blutbildenden und verwandten Gewebes | Neoplasie                                                                                                                                                                                                                                  | 21.1.5.13            |                      |                      |
| <b>D00-D09 In-situ-Neubildungen</b>                                                                                     |                                                                                                                                                                                                                                            |                      |                      |                      |
| D00 Carcinoma in situ der Mundhöhle, des Ösophagus und des Magens                                                       |                                                                                                                                                                                                                                            | 21.1.8.45            |                      |                      |
| D03 Melanoma in situ                                                                                                    |                                                                                                                                                                                                                                            | 21.1.8.6             | 20.91                |                      |
| D04 Carcinoma in situ der Haut                                                                                          |                                                                                                                                                                                                                                            | 21.1.8.6             | 20.91                |                      |
| <b>D10-D36 Gutartige Neubildungen</b>                                                                                   |                                                                                                                                                                                                                                            |                      |                      |                      |
| D12 Gutartige Neubildung des Kolons, des Rektums, des Analkanals und des Anus                                           | Benigne und maligne Tumore des Kolorektums                                                                                                                                                                                                 | 21.1.7.19            |                      |                      |
| D13 Gutartige Neubildung sonstiger und ungenau bezeichneter Teile des Verdauungssystems                                 | Benigne und primäre, sekundäre maligne Tumoren der Leber, Entzündungen und Neoplasien der Kopfspeicheldrüsen und Sialolithiasis, benigne und maligne Tumoren der Gallenblase und der Gallengänge, benigne und maligne Tumoren des Pankreas | 21.1.7.19, 21.1.7.21 | 21.1.7.26, 21.1.7.37 | 21.1.7.38, 21.1.8.45 |
| D14 Gutartige Neubildung des Mittelohres und des Atmungssystems                                                         |                                                                                                                                                                                                                                            | x                    |                      |                      |
| D16 gutartige Neubildung des Knochens und des Gelenkknorpels                                                            |                                                                                                                                                                                                                                            | x                    |                      |                      |
| D17 Gutartige Neubildung des Fettgewebes                                                                                |                                                                                                                                                                                                                                            | x                    |                      |                      |
| D18 Hämangiom und Lymphangiom                                                                                           | Angeborene Gefäßmissbildungen (Angiodysplasie, Av-Malformation, Hämangiome, Lymphangiome)                                                                                                                                                  | 21.1.1.24            |                      |                      |



|                                                                                                                          |                                                                                               |             |                      |           |
|--------------------------------------------------------------------------------------------------------------------------|-----------------------------------------------------------------------------------------------|-------------|----------------------|-----------|
| D21 Sonstige gutartige Neubildungen des Bindegewebes und anderer Weichteilgewebe                                         | Benigne und maligne Weichgewebstumore, benigne und maligne Hauttumore                         | 21.1.2.2    | 21.1.8.6             |           |
| D22 Melanozytennävus                                                                                                     | Benigne und maligne Hauttumore                                                                | 21.1.8.6    | 20.29, 20.91         |           |
| D25 Leiomyom des Uterus                                                                                                  | Benigne Uterustumore (Myome, Endometriumpolypen, etc.)                                        | 21.1.6.18   |                      |           |
| D27 Gutartige Neubildung des Ovars                                                                                       |                                                                                               | 21.1.6.22   |                      |           |
| D31 Gutartige Neubildung des Auges und der Augenanhangsgebilde                                                           |                                                                                               | x           |                      |           |
| D32 Gutartige Neubildung der Meningen                                                                                    | Zerebrale und spinale Tumoren und Metastasen                                                  | 21.1.10.13  |                      |           |
| D33 Gutartige Neubildung des Gehirns und anderer Teile des Zentralnervensystems                                          | Zerebrale und spinale Tumoren und Metastasen, Akustikusneurinom, Vestibularisschwannom        | 21.1.10.13  | 21.1.10.25           |           |
| D35 Gutartige Neubildung sonstiger und nicht näher bezeichneter endokriner Drüsen                                        | Benigne und maligne Tumoren der Nebennieren                                                   | 21.1.3.26   | 21.1.3.20            |           |
| <b>D37-D48 Neubildungen unsicheren oder unbekanntes Verhaltens</b>                                                       |                                                                                               |             |                      |           |
| D44 Neubildung unsicheren oder unbekanntes Verhaltens der endokrinen Drüsen                                              | Benigne und maligne Tumoren der Nebennieren                                                   | 21.1.3.20   |                      |           |
| D45 Polycythaemia vera                                                                                                   | Myeloproliferative Neoplasien (Polyzythaemia vera, essentielle Thrombozythämie, Myelofibrose) | 21.1.5.13   |                      |           |
| D46 Myelodysplastische Syndrome                                                                                          |                                                                                               | 21.1.5.14   |                      |           |
| D47 Sonstige Neubildungen unsicheren oder unbekanntes Verhaltens des lymphatischen, blutbildenden und verwandten Gewebes | Myeloproliferative Neoplasien (Polyzythaemia vera, essentielle Thrombozythämie, Myelofibrose) | 21.1.5.13   |                      |           |
| <b>D50-D53 Alimentäre Anämien</b>                                                                                        |                                                                                               |             |                      |           |
| D50 Eisenmangelanämie                                                                                                    | Anämien                                                                                       | 21.1.5.21   |                      |           |
| D51 Vitamin-B12-Mangelanämie                                                                                             |                                                                                               | 21.1.5.21   |                      |           |
| D52 Folsäure-Mangelanämie                                                                                                |                                                                                               | 21.1.5.21   |                      |           |
| <b>D55-D59 Hämolytische Anämien</b>                                                                                      |                                                                                               |             |                      |           |
| D60-D64 Aplastische und sonstige Anämien                                                                                 | Anämien                                                                                       | 21.1.5.21   |                      |           |
| <b>D65-D69 Koagulopathien, Purpura und sonstige hämorrhagische Oathesen</b>                                              |                                                                                               |             |                      |           |
| D70-D77 Sonstige Krankheiten des Blutes und der blutbildenden Organe                                                     | Hämophilie A und B, Sonstige hämorrhagische und thrombophile Diathesen und DD Diathesen       | 21.1.5.10   | 21.1.5.20            |           |
| <b>D80-D90 Bestimmte Störungen mit Beteiligung des Immunsystems</b>                                                      |                                                                                               |             |                      |           |
| D83 Variabler Immundefekt [common variable immunodeficiency]                                                             |                                                                                               | 21.1.5.12   |                      |           |
| D84 Sonstige Immundefekte                                                                                                | Urtikaria und Angioödem                                                                       | 21.1.5.1-21 | 21.1.5.12            | 21.1.8.40 |
| D86 Sarkoidose                                                                                                           |                                                                                               | 21.1.4.20   |                      |           |
| D89 Sonstige Störungen mit Beteiligung des Immunsystems, andererseits nicht klassifiziert                                |                                                                                               | 21.1.5.12   |                      |           |
| D90 Immunkompromittierung nach Bestrahlung, Chemotherapie und sonstigen immunsuppressiven Maßnahmen                      |                                                                                               | 21.1.5.12   |                      |           |
| <b>E00-E07 Krankheiten der Schilddrüse</b>                                                                               |                                                                                               |             |                      |           |
| E10-E14 Diabetes mellitus                                                                                                | Struma mit und ohne Knoten, Hypo- und Hyperthyreose, Immunthyreopathien                       | 21.1.3.1-3  |                      |           |
| E10 Primär insulinabhängiger Diabetes mellitus [Typ-1-Diabetes]                                                          | Diabetes mellitus Typ 1                                                                       | 21.1.3.4    |                      |           |
| E11 Nicht primär insulinabhängiger Diabetes mellitus [Typ-2-Diabetes]                                                    | Diabetes mellitus Typ 2                                                                       | 21.1.3.5    |                      |           |
| E14 Nicht näher bezeichneter Diabetes mellitus                                                                           |                                                                                               | 21.1.3.17   |                      |           |
| <b>E15-E16 Sonstige Störungen der Blutglukose-Regulation und der inneren Sekretion des Pankreas</b>                      |                                                                                               |             |                      |           |
| <b>E20-E35 Krankheiten sonstiger endokriner Drüsen</b>                                                                   |                                                                                               |             |                      |           |
| E21 Hyperparathyreoidismus und sonstige Krankheiten der Nebenschilddrüse                                                 | Hyper- und Hypoparathyreoidismus                                                              | 21.1.3.3    |                      |           |
| E22 Überfunktion der Hypophyse                                                                                           |                                                                                               | 13.3.14     |                      |           |
| E23 Unterfunktion und andere Störungen der Hypophyse                                                                     | Diabetes insipidus, Hypophysenhinsuffizienz                                                   | 21.1.3.17   | 21.1.3.18            |           |
| E24 Cushing-Syndrom                                                                                                      | Hypercortisolismus (Cushing-Syndrom)                                                          | 21.1.3.21   |                      |           |
| E25 Adrenogenitale Störungen                                                                                             | Adrenogenitales Syndrom                                                                       | 21.1.3.25   |                      |           |
| E26 Hyperaldosteronismus                                                                                                 |                                                                                               | 21.1.3.22   |                      |           |
| E27 Sonstige Krankheiten der Nebenniere                                                                                  | Nebenniereninsuffizienz (z.B. M. Addison)                                                     | 21.1.3.23   | 13.3.14, 21.1.3.20   |           |
| E28 Ovarielle Dysfunktion                                                                                                |                                                                                               | 21.1.6.28   | 21.1.3.15, 21.1.3.24 |           |
| E29 Testikuläre Dysfunktion                                                                                              |                                                                                               | x           |                      |           |
| E30 Pubertätsstörungen, anderenorts nicht klassifiziert                                                                  | Pubertas praecox,tarda                                                                        | 21.1.3.10   |                      |           |
| E31 Polyglanduläre Dysfunktion                                                                                           |                                                                                               | x           |                      |           |

|                                                                                                                               |                                                                                                                       |            |               |                      |
|-------------------------------------------------------------------------------------------------------------------------------|-----------------------------------------------------------------------------------------------------------------------|------------|---------------|----------------------|
| E34 Sonstige endokrine Störungen                                                                                              |                                                                                                                       | 13.3.14    |               |                      |
| <b>E40-E46 Mangelernährung</b>                                                                                                |                                                                                                                       | 20.111     |               |                      |
| <b>E50-E64 Sonstige alimentäre Mangelzustände</b>                                                                             |                                                                                                                       | 16.2.1     | 20.111        |                      |
| <b>E65-E68 Adipositas und sonstige Überernährung</b>                                                                          |                                                                                                                       | 21.1.2.26  | 20.43         |                      |
| E66 Adipositas                                                                                                                |                                                                                                                       | 21.1.2.26  | 20.43         |                      |
| <b>E70-E90 Stoffwechselstörungen</b>                                                                                          |                                                                                                                       |            |               |                      |
| E70 Störungen des Stoffwechsels aromatischer Aminosäuren                                                                      | Störungen des Aminosäurestoffwechsels                                                                                 | 21.1.3.8   |               |                      |
| E72 Sonstige Störungen des Aminosäurestoffwechsels                                                                            |                                                                                                                       | 21.1.3.8   |               |                      |
| E73 Laktoseintoleranz                                                                                                         | Nahrungsmittelunverträglichkeiten und -allergie, Störungen des Kohlenhydratstoffwechsels (Galaktosämie, Glykogenosen) | 20.69      | 21.1.3.9      | 21.1.7.29            |
| E74 Sonstige Störungen des Kohlenhydratstoffwechsels                                                                          | Störungen des Kohlenhydratstoffwechsels (Galaktosämie, Glykogenosen)                                                  | 21.1.3.9   |               |                      |
| E75 Störungen des Sphingolipidstoffwechsels und sonstige Störungen der Lipidspeicherung                                       | Störungen des Lipidstoffwechsels                                                                                      | 21.1.3.7   |               |                      |
| E78 Störungen des Lipoproteinstoffwechsels und sonstige Lipidämien                                                            |                                                                                                                       | 21.1.3.7   |               |                      |
| E79 Störungen des Purin- und Pyrimidinstoffwechsels                                                                           |                                                                                                                       | 21.1.2.3   |               |                      |
| E80 Störungen des Porphyrin- und Bilirubinstoffwechsels                                                                       |                                                                                                                       | 21.1.5.11  |               |                      |
| E83 Störungen des Mineralstoffwechsels                                                                                        | Elektrolyt, Hyperparathyreoidismus, Morbus Wilson, Hämochromatose                                                     | 21.1.3.3   | 21.1.3.19     | 21.1.3.12, 21.1.3.13 |
| E84 Zystische Fibrose                                                                                                         | Mukoviszidose                                                                                                         | 21.1.4.15  | 20.10         |                      |
| E85 Amyloidose                                                                                                                |                                                                                                                       | 21.1.3.27  |               |                      |
| E86 Volumenmangel                                                                                                             | Flüssigkeitshaushalt                                                                                                  | 20.22      | 20.56, 20.117 | 21.1.3.19            |
| E87 Sonstige Störungen des Wasser- und Elektrolythaushaltes sowie des Säure-Basen-Gleichgewichts                              | Azidose und Alkalose, Störungen des Elektrolyt- und Flüssigkeitshaushaltes                                            | 21.1.3.14  | 21.1.3.19     |                      |
| <b>F00-F09 Organische, einschließlich symptomatischer psychischer Störungen</b>                                               |                                                                                                                       |            |               |                      |
| F00 Demenz bei Alzheimer-Krankheit                                                                                            | Demenz-Syndrome                                                                                                       | 21.1.10.59 |               |                      |
| F01 Vaskuläre Demenz                                                                                                          |                                                                                                                       | 21.1.10.59 |               |                      |
| F02 Demenz bei anderenorts klassifizierten Krankheiten                                                                        |                                                                                                                       | 21.1.10.59 |               |                      |
| F04 Organisches amnestisches Syndrom, nicht durch Alkohol oder andere psychotrope Substanzen bedingt                          | Amnesieformen, Wernicke-Enzephalopathie, organisches amnestisches Syndrom                                             | 21.1.10.41 | 20.32         | 21.1.10.60           |
| F05 Delir, nicht durch Alkohol oder andere psychotrope Substanzen bedingt                                                     | Postoperative kognitive Dysfunktion, Delir                                                                            | 21.1.10.58 | 21.1.10.42    |                      |
| F06 Andere psychische Störungen aufgrund einer Schädigung oder Funktionsstörung des Gehirns oder einer körperlichen Krankheit |                                                                                                                       | 21.1.10    |               |                      |
| F07 Persönlichkeits- und Verhaltensstörung aufgrund einer Krankheit, Schädigung oder Funktionsstörung des Gehirns             | Persönlichkeitsstörungen (dissoziale, histionische, paranoide, schizoide, emotional instabile Persönlichkeitsstörung) | 21.1.10.61 |               |                      |
| <b>F10-F19 Psychische und Verhaltensstörungen durch psychotrope Substanzen</b>                                                | Drogen und Medikamentenintoxikation, missbrauch                                                                       | 21.1.10.64 | 21.1.10.65    |                      |
| <b>F20-F29 Schizophrenie, schizotype und wahnhafte Störungen</b>                                                              |                                                                                                                       |            |               |                      |
| F20 Schizophrenie                                                                                                             |                                                                                                                       | 21.1.10.66 |               |                      |
| F22 Anhaltende wahnhafte Störungen                                                                                            | Wahn                                                                                                                  | 21.1.10.66 | 20.24         |                      |
| F23 Akute vorübergehende psychotische Störungen                                                                               |                                                                                                                       | 20.20      |               |                      |
| F25 Schizoaffektive Störungen                                                                                                 |                                                                                                                       | 21.1.10.47 |               |                      |
| <b>F30-F39 Affektive Störungen</b>                                                                                            |                                                                                                                       |            |               |                      |
| F31 Bipolare affektive Störung                                                                                                |                                                                                                                       | 21.1.10.43 |               |                      |
| F32 Depressive Episode                                                                                                        | Depression                                                                                                            | 21.1.10.45 |               |                      |
| F33 Rezidivierende depressive Störung                                                                                         |                                                                                                                       | 21.1.10.45 |               |                      |
| F34 Anhaltende affektive Störungen                                                                                            |                                                                                                                       | 21.1.10.45 | 13.3.2        |                      |
| <b>F40-F48 Neurotische, Belastungs- und somatoforme Störungen</b>                                                             |                                                                                                                       |            |               |                      |
| F40 Phobische Störungen                                                                                                       | spezifische Phobien, Angststörungen                                                                                   | 21.1.10.53 | 21.1.10.54    |                      |
| F41 Andere Angststörungen                                                                                                     | Angststörungen                                                                                                        | 21.1.10.53 |               |                      |
| F42 Zwangsstörung                                                                                                             |                                                                                                                       | 20.123     | 21.1.10.57    |                      |

|                                                                                                 |                                                                                                                                                                          |                        |                       |                        |
|-------------------------------------------------------------------------------------------------|--------------------------------------------------------------------------------------------------------------------------------------------------------------------------|------------------------|-----------------------|------------------------|
| F43 Reaktionen auf schwere Belastungen und Anpassungsstörungen                                  | Anpassungsstörungen, Akute Belastungsreaktion und Posttraumatische Belastungsstörung                                                                                     | 21.1.10.52             | 21.1.10.55            |                        |
| F44 Dissoziative Störungen [Konversionsstörungen]                                               |                                                                                                                                                                          | 20.19                  | 20.33, 20.106         | 13.3.3.(1)             |
| F45 Somatoforme Störungen                                                                       | Somatierungsstörung, somatoforme autonome Funktionsstörung, somatoforme Schmerzkrankung, Hypochondrische Störung                                                         | 21.1.10.56             | 21.1.10.63            | 20.85                  |
| <b>F50-F59 Verhaltensauffälligkeiten mit körperlichen Störungen und Faktoren</b>                |                                                                                                                                                                          |                        |                       |                        |
| F50 Essstörungen                                                                                | Anorexia nervosa, Bulimia nervosa, Binge-Eating Störung                                                                                                                  | 20.111                 | 21.1.3.28, 21.1.10.69 | 21.1.10.70, 21.1.10.71 |
| F51 Nichtorganische Schlafstörungen                                                             | Organische und nichtorganische Schlafstörungen                                                                                                                           | 20.83                  | 21.1.10.62            |                        |
| F52 Sexuelle Funktionsstörungen, nicht verursacht durch eine organische Störung oder Krankheit  | erektile Dysfunktion                                                                                                                                                     | 20.103                 | 21.1.10.39            |                        |
| F53 Psychische oder Verhaltensstörungen im Wochenbett, anderenorts nicht klassifiziert          |                                                                                                                                                                          | 21.1.11.10             |                       |                        |
| F54 Psychologische Faktoren oder Verhaltensfaktoren bei anderenorts klassifizierten Krankheiten |                                                                                                                                                                          | x                      |                       |                        |
| <b>F60-F69 Persönlichkeits- und Verhaltensstörungen</b>                                         |                                                                                                                                                                          |                        |                       |                        |
| F60 Spezifische Persönlichkeitsstörungen                                                        | Persönlichkeitsstörungen (dissoziale, histionische, paranoide, schizoide, emotional instabile Persönlichkeitsstörung)                                                    | 21.1.10.61             |                       | 20.73                  |
| F68 Andere Persönlichkeits- und Verhaltensstörungen                                             | Persönlichkeitsstörungen (dissoziale, histionische, paranoide, schizoide, emotional instabile Persönlichkeitsstörung), Münchhausen Syndrom, Münchhausen-by-proxy Syndrom | 21.1.10.61             | 21.1.10.74            | 20.73                  |
| <b>F70-F79 Intelligenzminderung</b>                                                             |                                                                                                                                                                          |                        |                       |                        |
| <b>F80-F89 Entwicklungsstörungen</b>                                                            |                                                                                                                                                                          |                        |                       |                        |
|                                                                                                 | Sprech- und Sprachstörungen, Lernstörungen, Entwicklungsstörungen, Intelligenzminderung                                                                                  | 21.1.10.48, 21.1.10.49 | 21.1.10.51            | 20.119                 |
| <b>F90-F98 Verhaltens- und emotionale Störungen mit Beginn in der Kindheit und Jugend</b>       |                                                                                                                                                                          |                        |                       |                        |
| F90 Hyperkinetische Störungen                                                                   |                                                                                                                                                                          | 20.19                  |                       |                        |
| F91 Störungen des Sozialverhaltens                                                              |                                                                                                                                                                          | 21.1.10.50             |                       |                        |
| F93 Emotionale Störungen des Kindesalters                                                       |                                                                                                                                                                          | 20.54                  |                       |                        |
| F94 Störungen sozialer Funktionen mit Beginn in der Kindheit und Jugend                         | Borderline                                                                                                                                                               | 20.71                  |                       |                        |
| F95 Ticstörungen                                                                                |                                                                                                                                                                          | 21.1.10.68             |                       |                        |
| F98 Andere Verhaltens- und emotionale Störungen mit Beginn in der Kindheit und Jugend           | Enuresis und Enkopresis                                                                                                                                                  | 21.1.6.43              |                       |                        |
| <b>G00-G09 Entzündliche Krankheiten des Zentralnervensystems</b>                                |                                                                                                                                                                          |                        |                       |                        |
|                                                                                                 | Meningoenzephalitis                                                                                                                                                      | 21.1.10.14             |                       |                        |
| <b>G10-G13 Systematrophien, die vorwiegend das Zentralnervensystem betreffen</b>                |                                                                                                                                                                          |                        |                       |                        |
|                                                                                                 | Multiple Sklerose, AML                                                                                                                                                   | 21.1.10.11             | 21.1.10.36            |                        |
| G10 Chorea Huntington                                                                           | Neurodegenerative Erkrankungen, z.B. Amyotrophe Lateralsklerose, Chorea Huntington                                                                                       | 21.1.10.36             |                       |                        |
| G11 Hereditäre Ataxie                                                                           |                                                                                                                                                                          | x                      |                       |                        |
| G12 Spinale Muskelatrophie und verwandte Syndrome                                               | Spinale Muskelatrophie                                                                                                                                                   | 21.1.10.35             |                       |                        |
| <b>G20-G26 Extrapiramidale Krankheiten und Bewegungsstörungen</b>                               |                                                                                                                                                                          |                        |                       |                        |
| G20 Primäres Parkinson-Syndrom                                                                  | Parkinson-Syndrom, atypische Parkinson-Syndrome (inkl. Lewy-Körperchen-Demenz)                                                                                           | 21.1.10.17             | 21.1.10.18            |                        |
| G21 Sekundäres Parkinson-Syndrom                                                                | Multisystematrophie, Lewy-Körperchen-Demenz)                                                                                                                             | 21.1.10.17             | 21.1.10.18            |                        |
| G24 Dystonie                                                                                    | Bewegungsstörung                                                                                                                                                         | 20.19                  |                       |                        |
| G25 Sonstige extrapyramidale Krankheiten und Bewegungsstörungen                                 | Nächtliche Bewegungsstörungen (Restless legs Syndrom)                                                                                                                    | 21.1.10.33             |                       |                        |

|                                                                                                |                                                                                                                                                                                                              |            |            |            |
|------------------------------------------------------------------------------------------------|--------------------------------------------------------------------------------------------------------------------------------------------------------------------------------------------------------------|------------|------------|------------|
| <b>G30-G32 Sonstige degenerative Krankheiten des Nervensystems</b>                             |                                                                                                                                                                                                              |            |            |            |
| G30 Alzheimer-Krankheit                                                                        | Neurodegenerative Erkrankungen, z.B. Amyotrophe                                                                                                                                                              | 21.1.10.36 | 21.1.10.59 |            |
| G31 Sonstige degenerative Krankheiten des Nervensystems, anderenorts nicht klassifiziert       |                                                                                                                                                                                                              | 21.1.10.36 | 21.1.10.59 |            |
| <b>G35-G37 Demyelinisierende Krankheiten des Zentralnervensystems</b>                          |                                                                                                                                                                                                              |            |            |            |
| G35 Multiple Sklerose [Encephalomyelitis disseminata]                                          |                                                                                                                                                                                                              | 21.1.10.11 |            |            |
| G36 Sonstige akute disseminierte Demyelinisation                                               |                                                                                                                                                                                                              | 21.1.10.11 |            |            |
| <b>G40-G47 Episodische und paroxysmale Krankheiten des Nervensystems</b>                       |                                                                                                                                                                                                              |            |            |            |
| G40 Epilepsie                                                                                  | Krampfanfälle, Epilepsie, Status epilepticus                                                                                                                                                                 | 21.1.10.19 |            |            |
| G41 Status epilepticus                                                                         |                                                                                                                                                                                                              | 21.1.10.19 |            |            |
| G43 Migräne                                                                                    |                                                                                                                                                                                                              | 21.1.10.15 |            |            |
| G44 Sonstige Kopfschmerzsyndrome                                                               | Spannungskopfschmerz, Clusterkopfschmerz, Medikamenten-induzierter Kopfschmerz                                                                                                                               | 21.1.10.23 | 20.57      |            |
| G45 Zerebrale transitorische Ischämie und verwandte Syndrome                                   |                                                                                                                                                                                                              | x          |            |            |
| G46 Zerebrale Gefäßsyndrome bei zerebrovaskulären Krankheiten                                  |                                                                                                                                                                                                              | x          |            |            |
| G47 Schlafstörungen                                                                            | Organische und nichtorganische Schlafstörungen                                                                                                                                                               | 21.1.10.62 | 20.83      |            |
| <b>G50-G59 Krankheiten von Nerven, Nervenwurzeln und Nervenplexus</b>                          |                                                                                                                                                                                                              |            |            |            |
| G50 Krankheiten des N. trigeminus [V. Hirnnerv]                                                | Trigeminusneuralgie und DD atypischer Gesichtsschmerz, Verletzungen und Paresen peripherer Nerven und Hirnnerven                                                                                             | 21.1.10.8  | 21.1.10.21 | 20.40      |
| G51 Krankheiten des N. facialis [VII. Hirnnerv]                                                | Verletzungen und Paresen peripherer Nerven und Hirnnerven, Fazialisparese                                                                                                                                    | 21.1.10.8  | 21.1.10.24 |            |
| G52 Krankheiten sonstiger Hirnnerven                                                           | Verletzungen und Paresen peripherer Nerven und Hirnnerven                                                                                                                                                    | 21.1.10.8  |            |            |
| G54 Krankheiten von Nervenwurzeln und Nervenplexus                                             | Verletzungen und Paresen peripherer Nerven und Hirnnerven                                                                                                                                                    | 21.1.11.8  | 21.1.11.15 |            |
| G55 Kompression von Nervenwurzeln und Nervenplexus bei anderenorts klassifizierten Krankheiten | Verletzungen und Paresen peripherer Nerven und Hirnnerven, Bandscheibenpathologien und radikuläre Syndrome                                                                                                   | 21.1.10.5  | 21.1.10.8  | 21.1.11.15 |
| G56 Mononeuropathien der oberen Extremität                                                     | Periphere Neuropathien                                                                                                                                                                                       | 21.1.10.16 |            |            |
| G57 Mononeuropathien der unteren Extremität                                                    |                                                                                                                                                                                                              | 21.1.10.16 |            |            |
| <b>G60-G64 Polyneuropathien und sonstige Krankheiten des peripheren Nervensystems</b>          |                                                                                                                                                                                                              |            |            |            |
| G61 Polyneuritis                                                                               | Periphere Neuropathien, Guillain-Barré Syndrom und Miller-Fisher-Syndrom                                                                                                                                     | 21.1.10.16 | 21.1.10.28 |            |
| G62 Sonstige Polyneuropathien                                                                  | Periphere Neuropathien                                                                                                                                                                                       | 20.106     | 21.1.3.6   | 21.1.10.16 |
| G63 Polyneuropathie bei anderenorts klassifizierten Krankheiten                                | Periphere Neuropathien, Diabeteskomplikationen (Mikro- und Makroangiopathien, Nephropathien, KHK, pAVK, Apoplex, diabetisches Fußsyndrom, diabetische Polyneuropathie, diabetische Retino- und Makulopathie) | 20.106     | 21.1.3.6   | 21.1.10.16 |
| <b>G70-G73 Krankheiten im Bereich der neuromuskulären Synapse und des Muskels</b>              |                                                                                                                                                                                                              |            |            |            |
| G70 Myasthenia gravis und sonstige neuromuskuläre Krankheiten                                  |                                                                                                                                                                                                              | 21.1.10.29 |            |            |
| G71 Primäre Myopathien                                                                         | Muskelschwäche, Muskeldystrophien                                                                                                                                                                            | 20.66      | 21.1.10.37 |            |

|                                                                                                           |                                                                                                                                                                                      |            |            |            |
|-----------------------------------------------------------------------------------------------------------|--------------------------------------------------------------------------------------------------------------------------------------------------------------------------------------|------------|------------|------------|
| G72 Sonstige Myopathien                                                                                   | Muskelschwäche                                                                                                                                                                       | 20.66      |            |            |
| <b>G80-G83 Zerebrale Lähmung und sonstige Lähmungssyndrome</b>                                            |                                                                                                                                                                                      |            |            |            |
| G80 Infantile Zerebralparese                                                                              |                                                                                                                                                                                      | 21.1.10.34 |            |            |
| G81 Hemiparese und Hemiplegie                                                                             | Lähmung                                                                                                                                                                              | 20.60      |            |            |
| G82 Paraparese und Paraplegie, Tetraparese und Tetraplegie                                                | Lähmung                                                                                                                                                                              | 20.60      |            |            |
| G83 Sonstige Lähmungssyndrome                                                                             |                                                                                                                                                                                      | x          |            |            |
| <b>G90-G99 Sonstige Krankheiten des Nervensystems</b>                                                     |                                                                                                                                                                                      |            |            |            |
| G91 Hydrozephalus                                                                                         |                                                                                                                                                                                      | 21.1.11.39 |            |            |
| G95 Sonstige Krankheiten des Rückenmarkes                                                                 | Spina                                                                                                                                                                                | 21.1.10.7  | 21.1.10.13 | 21.1.11.38 |
| <b>H00-H06 Affektionen des Augenlides, des Tränenapparates und der Orbita</b>                             |                                                                                                                                                                                      |            |            |            |
| H00 Hordeolum und Chalazion                                                                               |                                                                                                                                                                                      | 21.1.9.14  |            |            |
| H02 Sonstige Affektionen des Augenlides                                                                   | Ektropium, Entropium, Trichiasis                                                                                                                                                     | 21.1.9.12  |            |            |
| H04 Affektionen des Tränenapparates                                                                       | Dakryoadenitis, Dakryozystitis                                                                                                                                                       | 21.1.9.11  |            |            |
| <b>H10-H13 Affektionen der Konjunktiva</b>                                                                |                                                                                                                                                                                      |            |            |            |
| H10 Konjunktivitis                                                                                        |                                                                                                                                                                                      | 21.1.9.16  |            |            |
| H11 Sonstige Affektionen der Konjunktiva                                                                  | Hyposphagma                                                                                                                                                                          | 21.1.9.17  | 21.1.4.23  | 21.1.9.18  |
| <b>H15-H22 Affektionen der Sklera, der Hornhaut, der Iris und des Ziliarkörpers</b>                       |                                                                                                                                                                                      |            |            |            |
| H15 Affektionen der Sklera                                                                                |                                                                                                                                                                                      | x          |            |            |
| H16 Keratitis                                                                                             | HSV Keratitis                                                                                                                                                                        | 21.1.9.20  | 21.1.9.18  |            |
| H18 Sonstige Affektionen der Hornhaut                                                                     | Fremdkörper, Infiltrat der Hornhaut und Erosio, Ulkus Corneae                                                                                                                        | 21.1.9.19  | 21.1.9.18  |            |
| H20 Iridozyklitis                                                                                         | Uveitis: anterior, intermedia, posterior und Endophthalmitis                                                                                                                         | 21.1.9.23  |            |            |
| H22 Affektionen der Iris und des Ziliarkörpers bei anderenorts klassifizierten Krankheiten                |                                                                                                                                                                                      | 21.1.9.23  |            |            |
| <b>H25-H28 Affektionen der Linse</b>                                                                      |                                                                                                                                                                                      |            |            |            |
| H25 Cataracta senilis                                                                                     | Katarakt                                                                                                                                                                             | 21.1.9.22  |            |            |
| H26 Sonstige Kataraktformen                                                                               |                                                                                                                                                                                      | 21.1.9.22  |            |            |
| <b>H30-H36 Affektionen der Aderhaut und der Netzhaut</b>                                                  |                                                                                                                                                                                      |            |            |            |
| H30 Chorioretinitis                                                                                       | Uveitis: anterior, intermedia, posterior und Endophthalmitis                                                                                                                         | 21.1.9.23  |            |            |
| H32 Chorioretinale Affektionen bei anderenorts klassifizierten Krankheiten                                |                                                                                                                                                                                      | x          |            |            |
| H33 Netzhautablösung und Netzhautriss                                                                     | Ablatio retinae                                                                                                                                                                      | 21.1.9.24  |            |            |
| H34 Netzhautgefäßverschluss                                                                               | Gefäßverschlüsse der Netzhaut                                                                                                                                                        | 21.1.9.25  |            |            |
| H35 Sonstige Affektionen der Netzhaut                                                                     | Hypertone Veränderungen der Netzhaut, Altersbedingte Makuladegeneration                                                                                                              | 21.1.9.26  | 21.1.9.27  |            |
| H36 Affektionen der Netzhaut bei anderenorts klassifizierten Krankheiten                                  | Diabeteskomplikationen (Mikro- und Makroangiopathien, Nephropathie, KHK, pAVK, Apoplex, diabetisches Fußsyndrom, diabetisches Polyneuropathie, diabetische Retino- und Makulopathie) | 21.1.9.26  | 21.1.3.6   |            |
| <b>H40-H42 Glaukom</b>                                                                                    |                                                                                                                                                                                      |            |            |            |
| H40-H42 Glaukom                                                                                           |                                                                                                                                                                                      | 21.1.9.21  |            |            |
| <b>H43-H45 Affektionen des Glaskörpers und des Augapfels</b>                                              |                                                                                                                                                                                      |            |            |            |
| H43 Affektionen des Glaskörpers                                                                           |                                                                                                                                                                                      | x          |            |            |
| H44 Affektionen des Augapfels                                                                             | Bulbusverletzungen: Contusio, Perforation, Fremdkörper, Uveitis: anterior, intermedia, posterior und Endophthalmitis                                                                 | 21.1.9.15  | 21.1.9.23  |            |
| <b>H46-H48 Affektionen des N. opticus und der Sehbahn</b>                                                 |                                                                                                                                                                                      |            |            |            |
| H46 Neuritis nervi optici                                                                                 | Stauungspapille, Atrophie des N. opticus                                                                                                                                             | 21.1.9.28  |            |            |
| H47 Sonstige Affektionen des N. opticus [11. Hirnnerv] und der Sehbahn                                    |                                                                                                                                                                                      | 21.1.9.28  |            |            |
| H48 Affektionen des N. opticus [11. Hirnnerv] und der Sehbahn bei anderenorts klassifizierten Krankheiten |                                                                                                                                                                                      | 21.1.9.28  |            |            |

|                                                                                           |                                                                                                                                                                                      |             |           |  |
|-------------------------------------------------------------------------------------------|--------------------------------------------------------------------------------------------------------------------------------------------------------------------------------------|-------------|-----------|--|
| H49-H52 Affektionen der Augenmuskeln, Störungen der Blickbewegungen und Refraktionsfehler |                                                                                                                                                                                      | x           |           |  |
| H49 Strabismus paralyticus                                                                |                                                                                                                                                                                      | 20.25       |           |  |
| H50 Sonstiger Strabismus                                                                  |                                                                                                                                                                                      | 20.25       |           |  |
| H52 Akkommodationsstörungen und Refraktionsfehler                                         |                                                                                                                                                                                      | 21.1.9.9    |           |  |
| <b>H53-H54 Sehstörungen und Blindheit</b>                                                 |                                                                                                                                                                                      | 20.25       |           |  |
| <b>H55-H59 Sonstige Affektionen des Auges und der Augenanhangsgebilde</b>                 |                                                                                                                                                                                      | 21.1.9.9-29 |           |  |
| H57 Sonstige Affektionen des Auges und der Augenanhangsgebilde                            |                                                                                                                                                                                      | 21.1.9.9-29 |           |  |
| <b>H60-H62 Krankheiten des äußeren Ohres</b>                                              |                                                                                                                                                                                      |             |           |  |
| H60 Otitis externa                                                                        | Otitis externa einschl. Otitis externa maligna                                                                                                                                       | 21.1.9.1    |           |  |
| H61 Sonstige Krankheiten des äußeren Ohres                                                |                                                                                                                                                                                      | x           |           |  |
| <b>H65-H75 Krankheiten des Mittelohres und des Warzenfortsatzes</b>                       |                                                                                                                                                                                      |             |           |  |
| H65 Nichteitrige Otitis media                                                             | Otitis media acuta und chronica einschl. otogener Komplikationen                                                                                                                     | 21.1.9.7    |           |  |
| H66 Eitrige und nicht näher bezeichnete Otitis media                                      | Tubenfunktionsstörung                                                                                                                                                                | 21.1.9.7    |           |  |
| H68 Entzündung und Verschluss der Tuba auditiva                                           |                                                                                                                                                                                      | 21.1.9.2    |           |  |
| H70 Mastoiditis und verwandte Zustände                                                    |                                                                                                                                                                                      | x           |           |  |
| H71 Cholesteatom des Mittelohres                                                          |                                                                                                                                                                                      | x           |           |  |
| H72 Trommelfellperforation                                                                | Trommelfellverletzungen                                                                                                                                                              | 21.1.9.4    |           |  |
| <b>H80-H83 Krankheiten des Innenohres</b>                                                 |                                                                                                                                                                                      |             |           |  |
| H80 Otosklerose                                                                           |                                                                                                                                                                                      | 21.1.9.8    |           |  |
| H81 Störungen der Vestibularfunktion                                                      | Peripher-vestibuläre Schwindelformen (BPLS, M. Menière, Neuritis vestibularis)                                                                                                       | 21.1.10.27  |           |  |
| H83 Sonstige Krankheiten des Innenohres                                                   | Schallempfindungsstörung                                                                                                                                                             | 21.1.9.3    |           |  |
| <b>H90-H95 Sonstige Krankheiten des Ohres</b>                                             |                                                                                                                                                                                      |             |           |  |
| H90 Hörverlust durch Schalleitungs- oder Schallempfindungsstörung                         | Schalleitungsschwerhörigkeit (z.B. Tubenfunktionsstörung, Paikenerguß)                                                                                                               | 21.1.9.3    | 21.1.9.2  |  |
| H91 Sonstiger Hörverlust                                                                  |                                                                                                                                                                                      | 21.1.9.5    |           |  |
| H93.1 Tinnitus aurium                                                                     | Ohrgeräusche, Tinitus                                                                                                                                                                | 21.1.9.6    |           |  |
| <b>100-102 Akutes rheumatisches Fieber</b>                                                | Rheumatisches Fieber                                                                                                                                                                 | 21.1.5.9    |           |  |
| <b>105-109 Chronische rheumatische Herzkrankheiten</b>                                    |                                                                                                                                                                                      |             |           |  |
| 105 Rheumatische Mitralklappenkrankheiten                                                 | Klappenerkrankung                                                                                                                                                                    | 21.1.1.8    |           |  |
| 106 Rheumatische Aortenklappenkrankheiten                                                 | Klappenerkrankung                                                                                                                                                                    | 21.1.1.8    |           |  |
| 107 Rheumatische Trikuspidalklappenkrankheiten                                            | Klappenerkrankung                                                                                                                                                                    | 21.1.1.8    |           |  |
| <b>110-115 Hypertonie [Hochdruckkrankheit]</b>                                            |                                                                                                                                                                                      |             |           |  |
| 110 Essentielle (primäre) Hypertonie                                                      |                                                                                                                                                                                      | 21.1.1.17   |           |  |
| 111 Hypertensive Herzkrankheit                                                            | Cor pulmonale                                                                                                                                                                        | 21.1.1.20   |           |  |
| 112 Hypertensive Nierenkrankheit                                                          | Nierenarterienstenose                                                                                                                                                                | 21.1.1.28   |           |  |
| 115 Sekundäre Hypertonie                                                                  |                                                                                                                                                                                      | 21.1.1.19   |           |  |
| <b>120-125 Ischämische Herzkrankheiten</b>                                                | Diabeteskomplikationen (Mikro- und Makroangiopathien, Nephropathie, KHK, pAVK, Apoplex, diabetisches Fußsyndrom, diabetisches Polyneuropathie, diabetische Retino- und Makulopathie) | 21.1.3.6    |           |  |
| 120 Angina pectoris                                                                       | Thoraxschmerz, akutes Koronarsyndrom                                                                                                                                                 | 20.107      | 21.1.1.15 |  |
| 121 Akuter Myokardinfarkt                                                                 | Akutes Koronarsyndrom                                                                                                                                                                | 20.7        | 21.1.1.15 |  |
| 122 Rezidivierender Myokardinfarkt                                                        | Akutes Koronarsyndrom                                                                                                                                                                | 21.1.1.15   |           |  |
| 125 Chronische ischämische Herzkrankheit                                                  | Kronare Herzkrankheit                                                                                                                                                                | 21.1.1.12   |           |  |
| <b>126-128 Pulmonale Herzkrankheit und Krankheiten des Lungenkreislaufes</b>              |                                                                                                                                                                                      |             |           |  |
| 126 Lungenembolie                                                                         |                                                                                                                                                                                      | 21.1.4.3    |           |  |
| 127 Sonstige pulmonale Herzkrankheiten                                                    | Cor pulmonale                                                                                                                                                                        | 21.1.1.20   |           |  |
| <b>130-152 Sonstige Formen der Herzkrankheit</b>                                          |                                                                                                                                                                                      |             |           |  |
| 130 Akute Perikarditis                                                                    |                                                                                                                                                                                      | 21.1.1.11   |           |  |
| 131 Sonstige Krankheiten des Perikards                                                    | Herzbeutelamponade                                                                                                                                                                   | 21.1.1.23   |           |  |
| 133 Akute und subakute Endokarditis                                                       | Endokarditis                                                                                                                                                                         | 21.1.1.9    |           |  |
| 134 Nichtrheumatische Mitralklappenkrankheiten                                            | Herzklappenerkrankung                                                                                                                                                                | 21.1.1.8    |           |  |
| 135 Nichtrheumatische Aortenklappenkrankheiten                                            |                                                                                                                                                                                      | 21.1.1.8    |           |  |
| 136 Nichtrheumatische Trikuspidalklappenkrankheiten                                       |                                                                                                                                                                                      | 21.1.1.8    |           |  |
| 138 Endokarditis, Herzklappe nicht näher bezeichnet                                       | Endokarditis                                                                                                                                                                         | 21.1.1.9    |           |  |
| 139 Endokarditis und Herzklappenkrankheiten bei Anderenorts klassifizierten Krankheiten   |                                                                                                                                                                                      | 21.1.1.9    |           |  |
| 140 Akute Myokarditis                                                                     | Myokarditis                                                                                                                                                                          | 21.1.1.10   |           |  |

|                                                                                                            |                                                                                                                                                                                                                                                                              |           |           |          |
|------------------------------------------------------------------------------------------------------------|------------------------------------------------------------------------------------------------------------------------------------------------------------------------------------------------------------------------------------------------------------------------------|-----------|-----------|----------|
| 141 Myokarditis bei anderenorts klassifizierten Krankheiten                                                |                                                                                                                                                                                                                                                                              | 21.1.1.10 |           |          |
| 142 Kardiomyopathie                                                                                        |                                                                                                                                                                                                                                                                              | 21.1.1.25 |           |          |
| 144 Atrioventrikulärer Block und Linksschenkelblock                                                        | Herzrhythmusstörungen                                                                                                                                                                                                                                                        | 21.1.1.13 |           |          |
| 145 Sonstige kardiale Erregungsleitungsstörungen                                                           |                                                                                                                                                                                                                                                                              | 21.1.1.13 |           |          |
| 146 Herzstillstand                                                                                         |                                                                                                                                                                                                                                                                              | 21.1.1.13 |           |          |
| 147 Paroxysmale Tachykardie                                                                                |                                                                                                                                                                                                                                                                              | 21.1.1.13 |           |          |
| 148 Vorhofflattern und Vorhofflimmern                                                                      |                                                                                                                                                                                                                                                                              | 21.1.1.13 |           |          |
| 149 Sonstige kardiale Arrhythmien                                                                          |                                                                                                                                                                                                                                                                              | 21.1.1.13 |           |          |
| 150 Herzinsuffizienz                                                                                       |                                                                                                                                                                                                                                                                              | 21.1.1.14 |           |          |
| <b>160-169 Zerebrovaskuläre Krankheiten</b>                                                                |                                                                                                                                                                                                                                                                              |           |           |          |
| 160 Subarachnoidalblutung                                                                                  | intrakranielle Blutung                                                                                                                                                                                                                                                       | 21.1.10.4 |           |          |
| 161 Intrazerebrale Blutung                                                                                 |                                                                                                                                                                                                                                                                              | 21.1.10.4 |           |          |
| 162 Sonstige nichttraumatische intrakranielle Blutung                                                      |                                                                                                                                                                                                                                                                              | 21.1.10.4 |           |          |
| 163 Hirninfarkt                                                                                            | Diabeteskomplikationen (Mikro- und Makroangiopathien, Nephropathie, KHK, pAVK, Apoplex, diabetisches Fußsyndrom, diabetische Polyneuropathie, diabetische Retino- und Makulopathie)                                                                                          | 21.1.3.6  |           |          |
| 165 Verschluss und Stenose präzerebraler Arterien ohne resultierenden Hirninfarkt                          | Gefäßverschlüsse                                                                                                                                                                                                                                                             | x         |           |          |
| 166 Verschluss und Stenose zerebraler Arterien ohne resultierenden Hirninfarkt                             | Zerebrovaskuläre Verschlusskrankheit (cAVK)                                                                                                                                                                                                                                  | 21.1.10.1 |           |          |
| 167 Sonstige zerebrovaskuläre Krankheiten                                                                  |                                                                                                                                                                                                                                                                              | 21.1.10.1 |           |          |
| 169 Folgen einer zerebrovaskulären Krankheit                                                               |                                                                                                                                                                                                                                                                              | 21.1.10.1 |           |          |
| <b>170-179 Krankheiten der Arterien, Arteriolen und Kapillaren</b>                                         |                                                                                                                                                                                                                                                                              |           |           |          |
| 170 Atherosklerose                                                                                         |                                                                                                                                                                                                                                                                              | 21.1.1.26 |           |          |
| 171 Aortenaneurysma und -dissektion                                                                        | Aneurysma, Aortendissektion                                                                                                                                                                                                                                                  | 21.1.1.5  | 21.1.1.6  |          |
| 172 Sonstiges Aneurysma                                                                                    | Aneurysma                                                                                                                                                                                                                                                                    | 21.1.1.5  |           |          |
| 173 Sonstige periphere Gefäßkrankheiten                                                                    | Peripher arterielle Verschlusskrankheit(pAVK), Primäres und sekundäres Raynaud-Syndrom, Diabeteskomplikationen (Mikro- und Makroangiopathien, Nephropathie, KHK, pAVK, Appoplex, diabetisches Fußsyndrom, diabetische Polyneuropathie, diabetische Retino- und Makulopathie) | 21.1.1.4  | 21.1.1.27 | 21.1.3.6 |
| 174 Arterielle Embolie und Thrombose                                                                       | Akute arterielle Thrombose und Embolie der Extremitäten inkl. Cholesterinembolie-Syndrom                                                                                                                                                                                     | 21.1.1.3  |           |          |
| <b>180-189 Krankheiten der Venen, der Lymphgefäße und der Lymphknoten, anderenorts nicht klassifiziert</b> |                                                                                                                                                                                                                                                                              |           |           |          |
| 180 Phlebitis und Thrombophlebitis                                                                         | Thrombophlebitis und Phlebothrombose, chronisch venöse Insuffizienz                                                                                                                                                                                                          | 21.1.1.7  |           |          |
| 181 Pfortaderthrombose                                                                                     |                                                                                                                                                                                                                                                                              | x         |           |          |
| 182 Sonstige venöse Embolie und Thrombose                                                                  |                                                                                                                                                                                                                                                                              | 21.1.1.7  |           |          |
| 183 Varizen der unteren Extremitäten                                                                       | Ulcus cruris, Varikosis                                                                                                                                                                                                                                                      | 21.1.8.2  | 21.1.8.3  |          |
| 184 Hämorrhoiden                                                                                           |                                                                                                                                                                                                                                                                              | 21.1.7.20 | 20.77     |          |
| 185 Ösophagusvarizen                                                                                       |                                                                                                                                                                                                                                                                              | x         |           |          |
| 186 Varizen sonstiger Lokalisationen                                                                       | Varikozele, Hydrozele und Spermatozele                                                                                                                                                                                                                                       | 21.1.6.6  |           |          |
| 187 Sonstige Venenkrankheiten                                                                              |                                                                                                                                                                                                                                                                              | 21.1.1.7  |           |          |
| <b>195-199 Sonstige und nicht näher bezeichnete Krankheiten des Kreislaufsystems</b>                       |                                                                                                                                                                                                                                                                              |           |           |          |
| 195 Hypotonie                                                                                              |                                                                                                                                                                                                                                                                              | x         |           |          |
| <b>J00-J06 Akute Infektionen der oberen Atemwege</b>                                                       |                                                                                                                                                                                                                                                                              |           |           |          |
| J00 Akute Rhinopharyngitis [Erkältungsschnupfen]                                                           | Akute und chronische Rhinitis und Sinusitis (inkl. Dentogener Sinusitis),                                                                                                                                                                                                    | 21.1.4.22 |           |          |
| J01 Akute Sinusitis                                                                                        |                                                                                                                                                                                                                                                                              | 21.1.4.22 | 21.1.4.23 |          |
| J02 Akute Pharyngitis                                                                                      |                                                                                                                                                                                                                                                                              | 21.1.4.22 | 20.44,    | 20.84    |

|                                                                                                     |                                                                                                                                                                    |           |           |           |
|-----------------------------------------------------------------------------------------------------|--------------------------------------------------------------------------------------------------------------------------------------------------------------------|-----------|-----------|-----------|
| J03 Akute Tonsillitis                                                                               | Tonsillitis,<br>Peritonsillarabszess und<br>Retropharyngealabszess<br>und sonstige<br>Logenabszesse                                                                | 20.1.5.5  | 20.44     |           |
| J04 Akute Laryngitis und Tracheitis                                                                 | Stenosierende<br>Laryngotracheitis<br>(Pseudokrupp, Laryngitis<br>subglottica) und sonstige<br>akute und chronische<br>Entzündungen des<br>Kehlkopfs               | 21.1.4.26 | 20.44     |           |
| J05 Akute obstruktive Laryngitis [Krupp] und Epiglottitis                                           | Epiglottitis, Stenosierende<br>Laryngotracheitis<br>(Pseudokrupp, Laryngitis<br>subglottica) und sonstige<br>akute und chronische<br>Entzündungen des<br>Kehlkopfs | 21.1.4.21 | 21.1.4.26 |           |
| J06 Akute Infektionen an mehreren oder nicht näher bezeichneten Lokalisationen der oberen Atemwege  | Influenza                                                                                                                                                          | 21.1.4.10 |           |           |
| <b>J09-J18 Grippe und Pneumonie</b>                                                                 |                                                                                                                                                                    | 20.27     | 21.1.4.9  | 21.1.4.10 |
| <b>J20-J22 Sonstige akute Infektionen der unteren Atemwege</b>                                      |                                                                                                                                                                    |           |           |           |
| J20 Akute Bronchitis                                                                                | Akute und chronische<br>Bronchitis, Bronchiektasien                                                                                                                | 21.1.4.6  |           |           |
| J21 Akute Bronchiolitis                                                                             |                                                                                                                                                                    | 21.1.4.7  |           |           |
| <b>J30-J39 Sonstige Krankheiten der oberen Atemwege</b>                                             |                                                                                                                                                                    |           |           |           |
| J30 Vasomotorische und allergische Rhinopathie                                                      | Allergische<br>Rhinokonjunktivitis und<br>allergische Rhinosinusitis                                                                                               | 21.1.4.23 |           |           |
| J31 Chronische Rhinitis, Rhinopharyngitis und Pharyngitis                                           | Akute und chronische                                                                                                                                               | 21.1.4.22 |           |           |
| J32 Chronische Sinusitis                                                                            | Rhinitis und Sinusitis (inkl.<br>Dentogener Sinusitis),                                                                                                            | 21.1.4.22 |           |           |
| J33 Nasenpolyp                                                                                      | Hypertrophie der Polypen<br>und Mandeln                                                                                                                            | 20.16     | 21.1.5.6  |           |
| J34 Sonstige Krankheiten der Nase und der Nasennebenhöhlen                                          | Epitaxis                                                                                                                                                           | 20.14     | 21.1.4.24 |           |
| J35 Chronische Krankheiten der Gaumen- und Rachenmandeln                                            | Tonsillitis,<br>Peritonsillarabszess,<br>Retropharyngealabszess<br>und sonstige<br>Logenabszesse,<br>Hypertrophie der Polypen<br>und Mandeln                       | 21.1.5.5  | 21.1.5.6  |           |
| J38 Krankheiten der Stimmlippen und des Kehlkopfes, anderenorts nicht klassifiziert                 | Stenosierende<br>Laryngotracheitis<br>(Pseudokrupp, Laryngitis<br>subglottica) und sonstige<br>akute und chronische<br>Entzündungen des<br>Kehlkopfs               | 21.1.4.26 |           |           |
| <b>J40-J47 Chronische Krankheiten der unteren Atemwege</b>                                          |                                                                                                                                                                    |           |           |           |
| J41 Einfache und schleimig-eitrige chronische Bronchitis                                            | Akute und Chronische<br>Bronchitis, Bronchiektasien                                                                                                                | 20.49     | 21.1.4.6  |           |
| J43 Emphysem                                                                                        | Lungenemphysem                                                                                                                                                     | 21.1.4.11 |           |           |
| J44 Sonstige chronische obstruktive Lungenkrankheit                                                 |                                                                                                                                                                    | 21.1.4.8  |           |           |
| J45 Asthma bronchiale                                                                               |                                                                                                                                                                    | 21.1.4.13 |           |           |
| J46 Status asthmaticus                                                                              |                                                                                                                                                                    | x         |           |           |
| J47 Bronchiektasien                                                                                 | Akute und chronische<br>Bronchitis, Bronchiektasien                                                                                                                | 21.1.4.6  |           |           |
| <b>J60-J70 Lungenkrankheiten durch exogene Substanzen</b>                                           |                                                                                                                                                                    |           |           |           |
| J61 Pneumokoniose durch Asbest und sonstige anorganische Fasern                                     | Pneumokoniosen                                                                                                                                                     | 21.1.4.33 |           |           |
| J62 Pneumokoniose durch Quarzstaub                                                                  |                                                                                                                                                                    | 21.1.4.33 |           |           |
| J63 Pneumokoniose durch sonstige anorganische Stäube                                                |                                                                                                                                                                    | 21.1.4.33 |           |           |
| J66 Krankheit der Atemwege durch spezifischen organischen Staub                                     |                                                                                                                                                                    | x         |           |           |
| J67 Allergische Alveolitis durch organischen Staub                                                  |                                                                                                                                                                    | x         |           |           |
| J69 Pneumonie durch feste und flüssige Substanzen                                                   |                                                                                                                                                                    | 21.1.4.9  |           |           |
| <b>J80-J84 Sonstige Krankheiten der Atmungsorgane, die hauptsächlich das Interstitium betreffen</b> |                                                                                                                                                                    |           |           |           |
| J81 Lungenödem                                                                                      |                                                                                                                                                                    | x         |           |           |
| J84 Sonstige interstitielle Lungenkrankheiten                                                       | Lungenfibrose                                                                                                                                                      | 21.1.4.29 |           |           |
| <b>J85-J86 Purulente und nekrotisierende Krankheitszustände der unteren Atemwege</b>                |                                                                                                                                                                    |           |           |           |
| J86 Pyothorax                                                                                       | Pleuraerguss, Pleuritis,<br>Pleuraempyem,<br>Hämatothorax, Chylothorax                                                                                             | 21.1.4.5  |           |           |
| <b>J90-J94 Sonstige Krankheiten der Pleura</b>                                                      |                                                                                                                                                                    |           |           |           |
| J90 Pleuraerguss, anderenorts nicht klassifiziert                                                   | Pleuraerguss, Pleuritis,                                                                                                                                           | 21.1.4.5  |           |           |
| J91 Pleuraerguss bei anderenorts klassifizierten Krankheiten                                        | Pleuraempyem,                                                                                                                                                      | 21.1.4.5  |           |           |
| J93 Pneumothorax                                                                                    |                                                                                                                                                                    | 21.1.4.4  |           |           |



|                                                                             |                                                                                              |                      |                      |                      |
|-----------------------------------------------------------------------------|----------------------------------------------------------------------------------------------|----------------------|----------------------|----------------------|
| <b>J95-J99 Sonstige Krankheiten des Atmungssystems</b>                      |                                                                                              |                      |                      |                      |
| J98 Sonstige Krankheiten der Atemwege                                       | Lungenemphysem, Mediastinitis                                                                | 21.1.4.11            | 21.1.4.12            |                      |
| <b>K00-K14 Krankheiten der Mundhöhle, der Speicheldrüsen und der Kiefer</b> |                                                                                              |                      |                      |                      |
| K10 Sonstige Krankheiten der Kiefer                                         | Entzündungen und Neoplasien (benigne, maligne) der Kopfspeicheldrüsen, Sialolithiasis        | 21.1.8.45            | 21.1.7.26            |                      |
| K12 Stomatitis und verwandte Krankheiten                                    |                                                                                              | 20.88                | 20.120               |                      |
| K13 Sonstige Krankheiten der Lippe und der Mundschleimhaut                  |                                                                                              | 20.120               |                      |                      |
| <b>K20-K31 Krankheiten des Ösophagus, des Magens und des Duodenums</b>      |                                                                                              |                      |                      |                      |
| K20 Ösophagitis                                                             | Refluxösophagitis, Barrett-Ösophagus                                                         | 21.1.7.10            | 20.107               |                      |
| K21 Gastroösophageale Refluxkrankheit                                       |                                                                                              | 21.1.7.10            |                      |                      |
| K22 Sonstige Krankheiten des Ösophagus                                      | Achalasie, Divertikel, Pseudodivertikel des Ösophagus und Pharynx                            | 21.1.7.10, 21.1.7.11 | 21.1.7.39, 21.1.7.40 |                      |
| K25 Ulcus ventriculi                                                        | Gastroduodenale                                                                              | 21.1.7.15            |                      |                      |
| K26 Ulcus duodeni                                                           | Ulkuserkrankung                                                                              | 21.1.7.15            |                      |                      |
| K29 Gastritis und Duodenitis                                                | akute und chronische Gastritis, Kolitis, Enterokolitis, Gastroenteritis und Wurmerkrankungen | 21.1.7.25            | 21.1.7.28            |                      |
| K30 Dyspepsie                                                               |                                                                                              | x                    |                      |                      |
| K31 Sonstige Krankheiten des Magens und des Duodenums                       |                                                                                              | x                    |                      |                      |
| <b>K35-K38 Krankheiten der Appendix</b>                                     |                                                                                              |                      |                      |                      |
| K35 Akute Appendizitis                                                      |                                                                                              | 20.15<br>21.1.7.1    | 20.110, 21.1.7.1     |                      |
| <b>K40-K46 Hernien</b>                                                      |                                                                                              |                      |                      |                      |
| K40 Hernia inguinalis                                                       | Leistenhernie und Femoralhernie                                                              | 21.1.7.12            | 21.1.7.13, 21.1.7.14 | 21.1.11.33           |
| K41 Hernia femoralis                                                        |                                                                                              | 21.1.7.12            |                      |                      |
| K42 Hernia umbilicalis                                                      | Bauchwandhernie, Nabelhernie, Nabelschnurhernie und                                          | 21.1.7.14            |                      |                      |
| K43 Hernia ventralis                                                        |                                                                                              | 21.1.7.14            |                      |                      |
| K44 Hernia diaphragmatica                                                   | Diaphragmale Hernie                                                                          | 21.1.11.33           | 21.1.7.13            |                      |
| <b>K50-K52 Nichtinfektiöse Enteritis und Kolitis</b>                        |                                                                                              |                      |                      |                      |
| K50 Crohn-Krankheit [Enteritis regionalis] [Morbus Crahn]                   | Kolitis, Enterokolitis, Gastroenteritis und Wurmerkrankungen                                 | 20.15, 20.113        | 21.1.7.18            | 21.1.7.28            |
| K51 Colitis ulcerosa                                                        | Chronisch entzündliche Darmerkrankungen                                                      | 21.1.7.18            |                      |                      |
| <b>K55-K63 Sonstige Krankheiten des Darmes</b>                              |                                                                                              |                      |                      |                      |
| K55 Gefäßkrankheiten des Darmes                                             | Verschlusskrankheit der Viszeralarterien (Mesenterialschämie)                                | 21.1.7.22            |                      |                      |
| K56 Paralytischer Ileus und mechanischer Ileus ohne Hernie                  | Mechanischer und paralytischer Ileus, Invagination                                           | 21.1.7.4             | 21.1.7.32            |                      |
| K57 Divertikulose des Darmes                                                | Dünndarm- und Dickdarmdivertikel inkl. Komplikationen                                        | 21.1.7.17            |                      |                      |
| K58 Reizdarmsyndrom                                                         |                                                                                              | 21.1.7.45            |                      |                      |
| K59 Sonstige funktionelle Darmstörungen                                     | Obstipation                                                                                  | 21.1.7.41            |                      |                      |
| K60 Fissur und Fistel in der Anal- und Rektalregion                         | Analfissur, Analfistel und Pilonidalsinus                                                    | 21.1.7.35            |                      |                      |
| K61 Abszess in der Anal- und Rektalregion                                   |                                                                                              | x                    |                      |                      |
| K62 Sonstige Krankheiten des Anus und des Rektums                           |                                                                                              | 21.1.7.35            | 21.1.7.48            |                      |
| K63 Sonstige Krankheiten des Darmes                                         | Kolitis, Enterokolitis, Gastroenteritis und Wurmerkrankungen                                 | 21.1.7.28            |                      |                      |
| <b>K65-K67 Krankheiten des Peritoneums</b>                                  |                                                                                              |                      |                      |                      |
| K65 Peritonitis                                                             | Peritonitis, Akutes Abdomen                                                                  | 21.1.7.5             |                      |                      |
| <b>K70-K77 Krankheiten der Leber</b>                                        |                                                                                              |                      |                      |                      |
| K70 Alkoholische Leberkrankheit                                             | Alkoholische und nicht-alkoholische                                                          | 20.34                | 21.1.7.8, 21.1.7.21  | 21.1.7.24, 21.1.7.46 |
| K71 Toxische Leberkrankheit                                                 |                                                                                              | 21.1.7.24            | 21.1.7.30            |                      |
| K72 Leberversagen, anderenorts nicht klassifiziert                          |                                                                                              | x                    |                      |                      |
| K74 Fibrose und Zirrhose der Leber                                          | Leberzirrhose                                                                                | 21.1.7.24            |                      |                      |
| K75 Sonstige entzündliche Leberkrankheiten                                  | Hepatitis, Autoimmunogene Hepatitiden, alkoholische und nicht-alkoholische Steatohepatitis   | 21.1.7.23            | 21.1.7.44, 21.1.7.43 | 21.1.7.30            |
| K76 Sonstige Krankheiten der Leber                                          | Fettlebererkrankung                                                                          | 21.1.7.46            |                      |                      |

|                                                                                                            |                                                                                                 |            |                |           |
|------------------------------------------------------------------------------------------------------------|-------------------------------------------------------------------------------------------------|------------|----------------|-----------|
| <b>K80-K87 Krankheiten der Gallenblase, der Gallenwege und des Pankreas</b>                                |                                                                                                 |            |                |           |
| K80 Cholelithiasis                                                                                         |                                                                                                 | 21.1.7.3   |                |           |
| K81 Cholezystitis                                                                                          |                                                                                                 | 21.1.7.2   |                |           |
| K83 Sonstige Krankheiten der Gallenwege                                                                    |                                                                                                 | 21.1.7.37  |                |           |
| K85 Akute Pankreatitis                                                                                     |                                                                                                 | 21.1.7.6   |                |           |
| K86 Sonstige Krankheiten des Pankreas                                                                      |                                                                                                 | 21.1.7.6-8 |                |           |
| <b>K90-K93 Sonstige Krankheiten des Verdauungssystems</b>                                                  |                                                                                                 |            |                |           |
| K90 Intestinale Malabsorption                                                                              | Zöliakie                                                                                        | 20.42      | 20.111         | 21.1.7.27 |
| K92 Sonstige Krankheiten des Verdauungssystems                                                             |                                                                                                 | 21.1.7     |                |           |
| <b>L00-L08 Infektionen der Haut und der Unterhaut</b>                                                      |                                                                                                 |            |                |           |
| L00 Staphylococcal scalded skin syndrome [SSS-Syndrom]                                                     |                                                                                                 | 21.1.8.18  |                |           |
| L01 Impetigo                                                                                               | Impetigo contagiosa                                                                             | 21.1.8.41  |                |           |
| L02 Hautabszess, Furunkel und Karbunkel                                                                    | Entzündungen der Haut und Hautanhangsgebilde (z.B. Erysipel, Phlegmone,                         | 21.1.8.42  |                |           |
| L03 Phlegmone                                                                                              |                                                                                                 | 21.1.8.42  |                |           |
| L04 Akute Lymphadenitis                                                                                    |                                                                                                 | 21.1.5.1   |                |           |
| L05 Pilonidalzyste                                                                                         |                                                                                                 | 21.1.7.35  |                |           |
| L08 Sonstige lokale Infektionen der Haut und der Unterhaut                                                 | Entzündungen der Haut und Hautanhangsgebilde (z.B. Erysipel, Phlegmone, Follikulitis, Furunkel) | 21.1.8.42  |                |           |
| <b>L10-L14 Bullöse Dermatosen</b>                                                                          |                                                                                                 |            |                |           |
| L10 Pemphiguskrankheiten                                                                                   |                                                                                                 | 20.21      |                |           |
| L12 Pemphigoidkrankheiten                                                                                  |                                                                                                 | 20.21      |                |           |
| L13 Sonstige bullöse Dermatosen                                                                            |                                                                                                 | 20.21      |                |           |
| <b>L20-L30 Dermatitis und Ekzem</b>                                                                        |                                                                                                 |            |                |           |
| L20 Atopisches [endogenes] Ekzem                                                                           |                                                                                                 | 21.1.8.21  |                |           |
| L21 Seborrhoisches Ekzem                                                                                   |                                                                                                 | 21.1.8.25  |                |           |
| L22 Windeldermatitis                                                                                       |                                                                                                 | 21.1.8.35  |                |           |
| L23 Allergische Kontaktdermatitis                                                                          | Toxische und allergische Kontaktdermatitis                                                      | 21.1.8.10  |                |           |
| L24 Toxische Kontaktdermatitis                                                                             |                                                                                                 | 21.1.8.10  |                |           |
| L27 Dermatitis durch oral, enteral oder parenteral aufgenommene Substanzen                                 | Arzneimittel-Exanthem                                                                           | 21.1.8.13  | 21.1.8.17      |           |
| L30 Sonstige Dermatitis                                                                                    |                                                                                                 | 21.1.8.10  | 21.1.8.13      | 21.1.8.14 |
| <b>L40-L45 Papulosquamöse Hautkrankheiten</b>                                                              |                                                                                                 |            |                |           |
| L40 Psoriasis                                                                                              |                                                                                                 | 21.1.8.24  | 20.89, 20.1.12 |           |
| L41 Parapsoriasis                                                                                          |                                                                                                 | x          |                |           |
| L42 Pityriasis rosea                                                                                       |                                                                                                 | x          |                |           |
| L43 Lichen ruber planus                                                                                    |                                                                                                 | x          |                |           |
| <b>L50-L54 Urtikaria und Erythem</b>                                                                       |                                                                                                 |            |                |           |
| L50 Urtikaria                                                                                              | Urtikaria und Angioödem                                                                         | 21.1.8.40  |                |           |
| L51 Erythema exsudativum multiforme                                                                        | Toxische epidermale Nekrolyse, Stevens-Johnson-Syndrom                                          | 21.1.8.19  |                |           |
| L52 Erythema nodosum                                                                                       |                                                                                                 | x          |                |           |
| <b>L55-L59 Krankheiten der Haut und der Unterhaut durch Strahleneinwirkung</b>                             |                                                                                                 |            |                |           |
| L55 Dermatitis solaris acuta                                                                               |                                                                                                 | 21.1.8.14  |                |           |
| L56 Sonstige akute Hautveränderungen durch Ultraviolettstrahlen                                            |                                                                                                 | x          |                |           |
| L57 Hautveränderungen durch chronische Exposition gegenüber nichtionisierender Strahlung                   |                                                                                                 | x          |                |           |
| <b>L60-L75 Krankheiten der Hautanhangsgebilde</b>                                                          |                                                                                                 |            |                |           |
| L60 Krankheiten der Nägel                                                                                  | Erkrankungen des Nagels, Fingerkuppenverletzungen                                               | 20.112     | 21.1.8.8       |           |
| L63 Alopecia areata                                                                                        | Effluvium und Alopezie                                                                          | 21.1.8.43  |                |           |
| L64 Alopecia androgenetica                                                                                 |                                                                                                 | 21.1.8.43  |                |           |
| L68 Hypertrichose                                                                                          | Veränderungen der Haare                                                                         | 20.112     |                |           |
| L70 Akne                                                                                                   |                                                                                                 | 21.1.8.30  |                |           |
| L71 Rosazea                                                                                                |                                                                                                 | 21.1.8.15  |                |           |
| L72 Follikuläre Zysten der Haut und der Unterhaut                                                          |                                                                                                 | x          |                |           |
| L73 Sonstige Krankheiten der Haarfollikel                                                                  |                                                                                                 | x          |                |           |
| <b>L80-L99 Sonstige Krankheiten der Haut und der Unterhaut</b>                                             |                                                                                                 |            |                |           |
| L80 Vitiligo                                                                                               |                                                                                                 | 21.1.8.28  |                |           |
| L82 Seborrhoische Keratose                                                                                 |                                                                                                 | 21.1.8.26  |                |           |
| L83 Acanthosis nigricans                                                                                   |                                                                                                 | x          |                |           |
| L85 Sonstige Epidermisverdickung                                                                           |                                                                                                 | x          |                |           |
| L88 Pyoderma gangraenosum                                                                                  |                                                                                                 | 20.120     | 20.91          |           |
| L89 Dekubitalgeschwür                                                                                      | Dekubitus                                                                                       | 21.1.8.4   |                |           |
| L90 Atrophische Hautkrankheiten                                                                            |                                                                                                 | x          |                |           |
| L92 Granulomatöse Krankheiten der Haut und der Unterhaut                                                   |                                                                                                 | x          |                |           |
| L93 Lupus erythematoses                                                                                    |                                                                                                 | 21.1.8.22  |                |           |
| L94 Sonstige lokalisierte Krankheiten des Bindegewebes                                                     |                                                                                                 | x          |                |           |
| <b>M00-M03 Infektiöse Arthropathien</b>                                                                    |                                                                                                 |            |                |           |
| M00 Eitrige Arthritis                                                                                      |                                                                                                 | 21.1.2.41  | 20.86          |           |
| M01 Direkte Gelenkinfektionen bei anderenorts Lyme klassifizierten infektiösen und parasitären Krankheiten |                                                                                                 | 20.35      | 20.86          | 21.1.2.33 |
| M02 Reaktive Arthritiden                                                                                   | Septische Arthritis, reaktive Arthritis, 'Coxitis fugax                                         | 21.1.2.33  | 21.1.2.47      |           |

|                                                                                                     |                                                                                                                                 |                         |                         |           |
|-----------------------------------------------------------------------------------------------------|---------------------------------------------------------------------------------------------------------------------------------|-------------------------|-------------------------|-----------|
| M03 Postinfektiöse und Reaktive Arthritiden bei anderenorts klassifizierten Krankheiten             |                                                                                                                                 | 21.1.2.33               |                         |           |
| <b>M05-M14 Entzündliche Polyarthropathien</b>                                                       | Gicht und Chondrokalzinose, Seropositive und seronegative rheumatoide Arthritis, Psoriasis, Psoriasisarthritis                  | 21.1.2.3                | 21.1.2.38               | 21.1.8.24 |
| <b>M15-M19 Arthrose</b>                                                                             | Arthrose                                                                                                                        | 21.1.2.31               | 20.35                   | 20.86     |
| M15 Polyarthrose                                                                                    |                                                                                                                                 | 21.1.2.31               |                         |           |
| M16 Koxarthrose [Arthrose des Hüftgelenkes]                                                         |                                                                                                                                 | 21.1.2.31               |                         |           |
| M17 Gonarthrose [Arthrose des Kniegelenkes]                                                         |                                                                                                                                 | 21.1.2.31               |                         |           |
| M19 Sonstige Arthrose                                                                               |                                                                                                                                 | 21.1.2.31               |                         |           |
| <b>M20-M25 Sonstige Gelenkkrankheiten</b>                                                           |                                                                                                                                 | 20.35                   | 20.86                   |           |
| M20 Erworbene Deformitäten der Finger und Zehen                                                     | Hallux valgus                                                                                                                   | 21.1.11.23              | 21.1.2.27               |           |
| M21 Sonstige erworbene Deformitäten der Extremitäten                                                |                                                                                                                                 | x                       |                         |           |
| M22 Krankheiten der Patella                                                                         | Verletzung der Patella (Patellafraktur, -luxation)                                                                              | 21.1.2.32               |                         |           |
| M23 Binnenschädigung des Kniegelenkes [internal derangement]                                        | Traumatische und degenerative Kniebinnenschäden (Meniskusläsion, Kreuzbandruptur)                                               | 21.1.2.22               |                         |           |
| M24 Sonstige näher bezeichnete Gelenkschädigungen                                                   |                                                                                                                                 | 21.1.2.16,<br>21.1.2.18 | 21.1.2.24,<br>21.1.2.36 |           |
| M25 Sonstige Gelenkkrankheiten, anderenorts nicht klassifiziert                                     | Schulterluxation, Ellenbogenluxation, Eadiuskopfsubluxation und weitere Gelenkluxationen, Sonstige Arthritiden und DD Arthritis | 21.1.2.16<br>21.1.2.18  | 21.1.2.24,<br>21.1.2.36 | 21.1.2.41 |
| <b>M30-M36 Systemkrankheiten des Bindegewebes</b>                                                   |                                                                                                                                 |                         |                         |           |
| M30 Panarteriitis nodosa und verwandte Zustände                                                     | Kawasaki-Syndrom (mukokutanes Lymphknotensyndrom), Vaskulitis                                                                   | 21.1.8.33               | 21.1.1.23               |           |
| M31 Sonstige nekrotisierende Vaskulopathien                                                         | Vaskulitis                                                                                                                      | 21.1.1.23               |                         |           |
| M32 Systemischer Lupus erythematoses                                                                |                                                                                                                                 | 21.1.8.22               |                         |           |
| M33 Dermatomyositis- Polymyositis                                                                   |                                                                                                                                 | 21.1.2.29               |                         |           |
| M34 Systemische Sklerose                                                                            |                                                                                                                                 | 21.1.8.44               |                         |           |
| M35 Sonstige Krankheiten mit System beteiligung des Bindegewebes                                    |                                                                                                                                 | x                       |                         |           |
| <b>M40-M43 Deformitäten der Wirbelsäule und des Rückens</b>                                         |                                                                                                                                 |                         |                         |           |
| M40 Kyphose und Lordose                                                                             | Skoliosen und sonstige Wirbelsäulendeformitäten                                                                                 | 21.1.2.13               |                         |           |
| M41 Skoliose                                                                                        |                                                                                                                                 | 21.1.2.13               |                         |           |
| M42 Osteochondrose der Wirbelsäule                                                                  |                                                                                                                                 | 21.1.2.13               | 21.1.2.11               |           |
| M43 Sonstige Deformitäten der Wirbelsäule und des Rückens                                           |                                                                                                                                 | 21.1.2.13               |                         |           |
| <b>M45-M49 Spondylopathien</b>                                                                      |                                                                                                                                 |                         |                         |           |
| M45 Spondylitis ankylosans                                                                          | Morbus Bechterew, Osteochondrosis und Spondylose                                                                                | 21.1.2.39, 21.1.2.11    |                         |           |
| M46 Sonstige entzündliche Spondylopathien                                                           |                                                                                                                                 | x                       |                         |           |
| M47 Spondylose                                                                                      | Osteochondrosis und Spondylose                                                                                                  | 21.1.2.11               |                         |           |
| M48 Sonstige Spondylopathien                                                                        |                                                                                                                                 | x                       |                         |           |
| <b>M50-M54 Sonstige Krankheiten der Wirbelsäule und des Rückens</b>                                 |                                                                                                                                 |                         |                         |           |
| M50 Zervikale Bandscheibenschäden                                                                   | Bandscheibenpathologien und radikuläre Syndrome                                                                                 | 21.1.10.5               |                         |           |
| M51 Sonstige Bandscheibenschäden                                                                    |                                                                                                                                 | 21.1.10.5               |                         |           |
| M53 Sonstige Krankheiten der Wirbelsäule und des Rückens, anderenorts nicht klassifiziert           |                                                                                                                                 | x                       |                         |           |
| M54 Rückenschmerzen                                                                                 | chronische Rückenschmerzen                                                                                                      | 20.82                   | 21.1.2.44               |           |
| <b>M60-M63 Krankheiten der Muskeln</b>                                                              |                                                                                                                                 |                         |                         |           |
| M60 Myositis                                                                                        |                                                                                                                                 | 20.66                   | 21.1.2.29               |           |
| M61 Kalzifikation und Ossifikation von Muskeln                                                      | Muskeldystrophie                                                                                                                | 21.1.10.37              |                         |           |
| <b>M65-M68 Krankheiten der Synovialis und der Sehnen</b>                                            |                                                                                                                                 |                         |                         |           |
| M65 Synovitis und Tenosynovitis                                                                     | Achillessehnenruptur und Sehnenrupturen an anderen Lokalisationen                                                               | 21.1.2.25               |                         |           |
|                                                                                                     | Sehnenscheiden-entzündung                                                                                                       | 21.1.2.9                |                         |           |
| <b>M70-M79 Sonstige Krankheiten des Weichteilgewebes</b>                                            |                                                                                                                                 |                         |                         |           |
| M70 Krankheiten des Weichteilgewebes im Zusammenhang mit Beanspruchung, Überbeanspruchung und Druck |                                                                                                                                 | 21.1.2                  |                         |           |
| M71 Sonstige Bursopathien                                                                           |                                                                                                                                 | x                       |                         |           |
| M72 Fibromatosen                                                                                    | Schwerwiegende Weichteilsinfektionen (z.B. Nekrotisierende Faszitiis)                                                           | 21.1.2.7                | 21.1.10.38              |           |
| M75 Schulterläsionen                                                                                | Verletzung und degenerative Veränderungen der Rotatorenmanschette                                                               | 21.1.11.13              | 21.1.2.18               | 21.1.2.18 |
| M76 Enthesopathien der unteren Extremität mit Ausnahme des Fußes                                    | Sehnenruptur                                                                                                                    | 21.1.2.25               |                         |           |

|                                                                                                   |                                                                                                                                                                                      |           |            |           |
|---------------------------------------------------------------------------------------------------|--------------------------------------------------------------------------------------------------------------------------------------------------------------------------------------|-----------|------------|-----------|
| M77 Sonstige Enthesopathien                                                                       | Sehnenscheiden-entzündung                                                                                                                                                            | 21.1.2.9  |            |           |
| M79 Sonstige Krankheiten des Weichteilgewebes, anderenorts nicht klassifiziert                    | Schwerwiegende Weichgewebsinfektionen (z.B. Nekrotisierende Fasziiitis), Fibromyalgie-Syndrom, Lipödem                                                                               | 21.1.2.7  | 21.1.2.42  | 21.1.2.43 |
| <b>M80-M85 Veränderungen der Knochendichte und -struktur</b>                                      |                                                                                                                                                                                      |           |            |           |
| M80 Osteoporose mit pathologischer Fraktur                                                        | Osteoporose                                                                                                                                                                          | 21.1.2.10 |            |           |
| M81 Osteoporose ohne pathologische Fraktur                                                        |                                                                                                                                                                                      | 21.1.2.10 |            |           |
| M84 Veränderungen der Knochenkontinuität                                                          |                                                                                                                                                                                      | x         |            |           |
| M85 Sonstige Veränderungen der Knochendichte und -struktur                                        | Osteomalazie und Rachitis                                                                                                                                                            | 21.1.2.10 | 21.1.2.11  | 21.1.2.37 |
| <b>M86-M90 Sonstige Osteopathien</b>                                                              |                                                                                                                                                                                      |           |            |           |
| M86 Osteomyelitis                                                                                 |                                                                                                                                                                                      | 21.1.2.12 |            |           |
| M87 Knochennekrose                                                                                | Aseptische Knochennekrosen (Osgood-Schlatter, Perthes, Kniemböck,...)                                                                                                                | 21.1.2.34 |            |           |
| M88 Osteodystrophia deformans [Paget-Krankheit]                                                   |                                                                                                                                                                                      | x         |            |           |
| M89 Sonstige Knochenkrankheiten                                                                   | Komplexes regionales Schmerzsyndrom                                                                                                                                                  | 21.1.2    | 21.1.10.22 |           |
| <b>M91-M94 Chondropathien</b>                                                                     |                                                                                                                                                                                      |           |            |           |
|                                                                                                   | Osteochondrosis und Spondylose                                                                                                                                                       | 21.1.2.3  | 21.1.2.11  | 21.1.2.46 |
| <b>M95-M99 Sonstige Krankheiten des Muskel-Skelett-Systems und des Bindegewebes</b>               |                                                                                                                                                                                      |           |            |           |
| M99 Biomechanische Funktionsstörungen, anderenorts nicht klassifiziert                            | Spinalkanalstenose (zervikal, lumbal)                                                                                                                                                | 21.1.10.7 |            |           |
| <b>N00-N08 Glomeruläre Krankheiten</b>                                                            |                                                                                                                                                                                      |           |            |           |
| N00 Akutes nephritisches Syndrom                                                                  | Glomerulonephritiden                                                                                                                                                                 | 21.1.6.12 |            |           |
| N01 Rapid-progressives nephritisches Syndrom                                                      |                                                                                                                                                                                      | 21.1.6.12 |            |           |
| N02 Rezidivierende und persistierende Hämaturie                                                   |                                                                                                                                                                                      | 20.45     | 21.1.6.12  |           |
| N03 Chronisches nephritisches Syndrom                                                             |                                                                                                                                                                                      | 21.1.6.12 |            |           |
| N04 Nephrotisches Syndrom                                                                         |                                                                                                                                                                                      | 21.1.6.12 |            |           |
| <b>N10-N16 Tubulointerstitielle Nierenkrankheiten</b>                                             |                                                                                                                                                                                      |           |            |           |
| N10 Akute tubulointerstitielle Nephritis                                                          | Tubulo-interstitielle Nierenerkrankungen                                                                                                                                             | 21.1.6.13 |            |           |
| N11 Chronische tubulointerstitielle Nephritis                                                     |                                                                                                                                                                                      | 21.1.6.13 |            |           |
| N13 Obstruktive Uropathie und Refluxuropathie                                                     |                                                                                                                                                                                      | 21.1.6.13 |            |           |
| N14 Arzneimittel- und schwermetallinduzierte tubulointerstitielle und tubuläre Krankheitszustände |                                                                                                                                                                                      | 21.1.6.13 |            |           |
| N15 Sonstige tubulointerstitielle Nierenkrankheiten                                               |                                                                                                                                                                                      | 21.1.6.13 |            |           |
| <b>N17-N19 Niereninsuffizienz</b>                                                                 |                                                                                                                                                                                      |           |            |           |
| N17 Akutes Nierenversagen                                                                         |                                                                                                                                                                                      | 21.1.6.14 |            |           |
| N18 Chronische Niereninsuffizienz                                                                 |                                                                                                                                                                                      | 21.1.6.15 |            |           |
| <b>N20-N23 Urolithiasis</b>                                                                       |                                                                                                                                                                                      |           |            |           |
| N20 Nieren- und Ureterstein                                                                       | Urolithiasis und Nierenkoliken                                                                                                                                                       | 21.1.6.5  |            |           |
| N21 Stein in den unteren Harnwegen                                                                |                                                                                                                                                                                      | 21.1.6.5  |            |           |
| <b>N25-N29 Sonstige Krankheiten der Niere und des Ureters</b>                                     |                                                                                                                                                                                      |           |            |           |
| N25 Krankheiten infolge Schädigung der tubulären Nierenfunktion                                   |                                                                                                                                                                                      | x         |            |           |
| N26 Schrumpfnieren, nicht näher bezeichnet                                                        |                                                                                                                                                                                      | x         |            |           |
| N28 Sonstige Krankheiten der Niere und des Ureters, anderenorts nicht klassifiziert               | Diabeteskomplikationen (Mikro- und Makroangiopathien, Nephropathie, KHK, pAVK, Apoplex, diabetisches Fußsyndrom, diabetisches Polyneuropathie, diabetische Retino- und Makulopathie) | 21.1.6    |            |           |
| <b>N30-N39 Sonstige Krankheiten des Harnsystems</b>                                               |                                                                                                                                                                                      |           |            |           |
| N30 Zystitis                                                                                      | Cystitis                                                                                                                                                                             | 20.45     | 21.1.6.1   |           |
| N31 Neuromuskuläre Dysfunktion der Harnblase, anderenorts nicht klassifiziert                     | Blasenfunktionsstörungen                                                                                                                                                             | 21.1.6.31 |            |           |
| N32 Sonstige Krankheiten der Harnblase                                                            |                                                                                                                                                                                      | 21.1.6.31 |            |           |
| N34 Urethritis und urethrales Syndrom                                                             | Infektionen der Niere und der ableitenden Harnwege (Pyelonephritis, Cystitis, Urethritis)                                                                                            | 21.1.6.1  |            |           |
| N35 Hamröhrenstriktur                                                                             | Hamröhrenstriktur, Ureterstriktur, Hydronephrose                                                                                                                                     | 21.1.6.11 |            |           |
| N39 Sonstige Krankheiten des Harnsystems                                                          |                                                                                                                                                                                      | 21.1.6    |            |           |
| <b>N40-N51 Krankheiten der männlichen Genitalorgane</b>                                           |                                                                                                                                                                                      |           |            |           |
| N40 Prostatahyperplasie                                                                           | Benignes Prostatahyperplasie Syndrom                                                                                                                                                 | 21.1.6.2  |            |           |
| N41 Entzündliche Krankheiten der Prostata                                                         |                                                                                                                                                                                      | 21.1.6.4  |            |           |
| N43 Hydrozele und Spermatozele                                                                    | Varikozele, Hydrozele und Spermatozele                                                                                                                                               | 21.1.6.6  |            |           |
| N44 Hodentorsion und Hydatidentorsion                                                             | akutes Skrotum (Orchitis,                                                                                                                                                            | 21.1.6.9  |            |           |

|                                                                                                                            |                                                                                                                                                                                                                             |                                    |                         |           |
|----------------------------------------------------------------------------------------------------------------------------|-----------------------------------------------------------------------------------------------------------------------------------------------------------------------------------------------------------------------------|------------------------------------|-------------------------|-----------|
| N45 Orchitis und Epididymitis                                                                                              | Epididymitis,                                                                                                                                                                                                               | 21.1.6.9                           |                         |           |
| N46 Sterilität beim Mann                                                                                                   | Sterilität und Infertilität                                                                                                                                                                                                 | 21.1.6.38                          |                         |           |
| N47 Vorhauthypertrophie, Phimose und Paraphimose                                                                           | Phimose, Paraphimose                                                                                                                                                                                                        | 21.1.6.10                          |                         |           |
| N48 Sonstige Krankheiten des Penis                                                                                         | Balanitis, Priapismus                                                                                                                                                                                                       | 21.1.6.36                          | 21.1.6.40               |           |
| N49 Entzündliche Krankheiten der männlichen Genitalorgane, anderenorts nicht klassifiziert                                 |                                                                                                                                                                                                                             | x                                  |                         |           |
| <b>N60-N64 Krankheiten der Mamma [Brustdrüse]</b>                                                                          |                                                                                                                                                                                                                             |                                    |                         |           |
| N60 Gutartige Mammadysplasie                                                                                               | Gutartige und bösartige Tumoren der Mamma                                                                                                                                                                                   | 21.1.8.5                           | 20.55                   |           |
| N61 Entzündliche Krankheiten der Mamma [Brustdrüse]                                                                        | Mastitis                                                                                                                                                                                                                    | 21.1.6.27                          |                         |           |
| N62 Hypertrophie der Mamma [Brustdrüse]                                                                                    | Gynäkomastie                                                                                                                                                                                                                | 21.1.3.16                          |                         |           |
| <b>N70-N77 Entzündliche Krankheiten der weiblichen Beckenorgane</b>                                                        |                                                                                                                                                                                                                             |                                    |                         |           |
| N70 Salpingitis und Oophoritis                                                                                             |                                                                                                                                                                                                                             | 21.1.6.21                          |                         |           |
| N71 Entzündliche Krankheit des Uterus, ausgenommen der Zervix                                                              |                                                                                                                                                                                                                             | 21.1.6.21                          |                         |           |
| N72 Entzündliche Krankheit der Cervix uteri                                                                                |                                                                                                                                                                                                                             | 21.1.6.21                          |                         |           |
| N73 Sonstige entzündliche Krankheiten im weiblichen Becken                                                                 |                                                                                                                                                                                                                             | 21.1.6.21                          |                         |           |
| N75 Krankheiten der Bartholin-Drüsen                                                                                       |                                                                                                                                                                                                                             | x                                  |                         |           |
| N76 Sonstige entzündliche Krankheit der Vagina und Vulva                                                                   | bakterielle Vaginose                                                                                                                                                                                                        | 20.38,<br>20.52                    | 21.1.6.17,<br>21.1.6.23 |           |
| <b>N80-N98 Nichtentzündliche Krankheiten des weiblichen Genitaltraktes</b>                                                 |                                                                                                                                                                                                                             |                                    |                         |           |
| N80 Endometriose                                                                                                           |                                                                                                                                                                                                                             | 21.1.6.19                          |                         |           |
| N81 Genitalprolaps bei der Frau                                                                                            | Descensus uteri,<br>Lageveränderungen des weiblichen Genitaltraktes (Descensus uteri, vaginae)                                                                                                                              | 21.1.6.30                          |                         |           |
| N83 Nichtentzündliche Krankheiten des Ovars, der Tuba uterina und des Lig. Latum uteri                                     | Primäre und sekundäre Ovarialinsuffizienz,<br>Ovarialtorsion, Aufbrechen von Adnextumor,<br>Eierstockzyste                                                                                                                  | 21.1.3.24, 21.1.6.20,<br>21.1.6.22 |                         |           |
| N85 Sonstige nichtentzündliche Krankheiten des Uterus, ausgenommen der Zervix                                              |                                                                                                                                                                                                                             | 21.1.6                             |                         |           |
| N86 Erosion und Ektropium der Cervix uteri                                                                                 |                                                                                                                                                                                                                             | x                                  |                         |           |
| N87 Dysplasie der Cervix uteri                                                                                             |                                                                                                                                                                                                                             | 21.1.6.26                          |                         |           |
| N89 Sonstige nichtentzündliche Krankheiten der Vagina                                                                      |                                                                                                                                                                                                                             | x                                  |                         |           |
| N90 Sonstige nichtentzündliche Krankheiten der Vulva und des Perineums                                                     | Schwellung im Bereich der Vulva, akute Schmerzen                                                                                                                                                                            | 21.1.6.17                          |                         |           |
| N91 Ausgebliebene, zu schwache oder zu seltene Menstruation                                                                | Störungen des ovariellen sowie des endometrialen                                                                                                                                                                            | 20.1                               | 21.1.6.28               |           |
| N92 Zu starke, zu häufige oder unregelmäßige Menstruation                                                                  |                                                                                                                                                                                                                             | 20.1                               | 21.1.6.28               |           |
| N94 Schmerz und andere Zustände im Zusammenhang mit den weiblichen Genitalorganen und dem Menstruationszyklus              | Störungen des ovariellen sowie des endometrialen Zyklus und assoziierte Erkrankungen (Prämenstruelle Störungen, Hypermenorrhoe, Amenorrhoe, Oligomenorrhoe, Dysmenorrhoe), Schwellung im Bereich der Vulva, akute Schmerzen | 20.1                               | 21.1.6.17               | 21.1.6.28 |
| N95 Klimakterische Störungen                                                                                               | Menopause, Klimakterium                                                                                                                                                                                                     | 21.1.6.29                          | 20.1                    |           |
| N97 Sterilität der Frau                                                                                                    |                                                                                                                                                                                                                             | 21.1.6.38                          |                         |           |
| N98 Komplikationen im Zusammenhang mit künstlicher Befruchtung                                                             | Ovarielles Hyperstimulationssyndrom (OHSS, schwere Form)                                                                                                                                                                    | 18.3.5                             | 21.1.3.15               |           |
| <b>000-008 Schwangerschaft mit abortivem Ausgang</b>                                                                       |                                                                                                                                                                                                                             |                                    |                         |           |
| 000 Extrauterin gravidität                                                                                                 | Ektope Schwangerschaft                                                                                                                                                                                                      | 21.1.11.1                          |                         |           |
| 001 Blasenmole                                                                                                             |                                                                                                                                                                                                                             | x                                  |                         |           |
| 003 Spontanabort                                                                                                           |                                                                                                                                                                                                                             | x                                  |                         |           |
| <b>010-016 Ödeme, Proteinurie und Hypertonie während der Schwangerschaft, der Geburt und des Wochenbettes</b>              |                                                                                                                                                                                                                             |                                    |                         |           |
| 014 Gestationshypertonie [schwangerschaftsinduziert] mit bedeutsamer Proteinurie                                           | Gestosen (Präeklampsie, Eklampsie, HELLP etc.)                                                                                                                                                                              | 21.1.11.5                          |                         |           |
| 015 Eklampsie                                                                                                              |                                                                                                                                                                                                                             | 21.1.11.5                          | 21.1.11.15              |           |
| <b>020-029 Sonstige Krankheiten der Mutter, die vorwiegend mit der Schwangerschaft verbunden sind</b>                      |                                                                                                                                                                                                                             |                                    |                         |           |
| 020 Blutung in der Frühschwangerschaft                                                                                     |                                                                                                                                                                                                                             | x                                  |                         |           |
| 021 Übermäßiges Erbrechen während der Schwangerschaft                                                                      |                                                                                                                                                                                                                             | x                                  |                         |           |
| 024 Diabetes mellitus in der Schwangerschaft                                                                               | Gestationsdiabetes                                                                                                                                                                                                          | 21.1.11.6                          |                         |           |
| 026 Betreuung der Mutter bei sonstigen Zuständen, die vorwiegend mit der Schwangerschaft verbunden sind                    |                                                                                                                                                                                                                             | x                                  |                         |           |
| <b>030-048 Betreuung der Mutter im Hinblick auf den Feten und die Amnionhöhle sowie mögliche Entbindungskomplikationen</b> |                                                                                                                                                                                                                             |                                    |                         |           |
|                                                                                                                            | Nabelschnurkomplikationen, z.B. Vorliegen, Vorfall, Umschlingung, Knoten, Erkrankungen der Eihäute und des Fruchtwassers, z.B. vorzeitiger Blasensprung, Amnioninfekt, Poly-Oligohydramnion                                 | 21.1.11.3                          | 21.1.11.4               |           |

|                                                                                                                                                             |                                                                                                                                                                                                                                                 |                          |                           |            |
|-------------------------------------------------------------------------------------------------------------------------------------------------------------|-------------------------------------------------------------------------------------------------------------------------------------------------------------------------------------------------------------------------------------------------|--------------------------|---------------------------|------------|
| <b>060-075 Komplikationen bei Wehentätigkeit und Entbindung</b>                                                                                             | Regelwidriger Geburtsmechanismus durch Lageanomalien, Haltungsanomalien, Einstellungsanomalien, Schulterdystokie                                                                                                                                | 21.1.11.2                | 21.1.11.13                |            |
| <b>085-092 Komplikationen, die vorwiegend im Wochenbett auftreten</b>                                                                                       |                                                                                                                                                                                                                                                 |                          |                           |            |
| 085 Puerperalfieber                                                                                                                                         | Komplikationen im Wochenbett (Infektion, Anämie, Rückbildungsstörung, psychische Störungen etc.)                                                                                                                                                | 21.1.11.10               |                           |            |
| 088 EmboUe während der Gestationsperiode                                                                                                                    | Komplikationen im Wochenbett (Infektion, Anämie, Rückbildungsstörung, psychische Störungen etc.), Fruchtwasserembolie                                                                                                                           | 21.1.11.10               | 21.1.11.14                |            |
| 091 Infektionen der Mamma [Brustdrüse] im Zusammenhang mit der Gestation                                                                                    | Komplikationen im Wochenbett (Infektion, Anämie, Rückbildungsstörung, psychische Störungen etc.)                                                                                                                                                | 21.1.11.10               |                           |            |
| <b>095-099 Sonstige Krankheitszustände während der Gestationsperiode, die anderenorts nicht klassifiziert sind</b>                                          | Intrauterine Infektionen (TORCH)                                                                                                                                                                                                                | 21.1.11.20               |                           |            |
| <b>P00-P04 Schädigung des Feten und Neugeborenen durch mütterliche Faktoren und durch Komplikationen bei Schwangerschaft, Wehentätigkeit und Entbindung</b> | Regelwidriger Geburtsmechanismus, Nabelschnurkomplikationen, Substanzabusus, Regelwidrigkeiten der Plazenta, Fetomateriale Inkompatibilität                                                                                                     | 21.1.11.2,<br>21.1.11.3  | 21.1.11.8,<br>21.1.11.29  | 21.1.11.7  |
| <b>P05-P08 Störungen im Zusammenhang mit der Schwangerschaftsdauer und dem fetalen Wachstum</b>                                                             |                                                                                                                                                                                                                                                 |                          |                           |            |
| P05 Intrauterine Mangelentwicklung und fetale Mangelernährung                                                                                               | Wachstumsstörungen                                                                                                                                                                                                                              | 21.1.11.17               |                           |            |
| P08 Störungen im Zusammenhang mit kurzer Schwangerschaftsdauer und niedrigem Geburtsgewicht, anderenorts nicht klassifiziert                                | Störungen des Geburtszeitpunktes (Frühgeburthlichkeit, Übertragung), Frühgeborenen-Retinopathie                                                                                                                                                 | 21.1.11.18               | 21.1.11.35                |            |
| <b>P10-P15 Geburtstrauma</b>                                                                                                                                | Geburtsverletzungen der Mutter (z.B. Dammriss, Episiotomie)                                                                                                                                                                                     | 21.1.11.9                | 21.1.11.15                |            |
| <b>P20-P29 Krankheiten des Atmungs- und Herz-Kreislaufsystems, die für die Perinatalperiode spezifisch sind</b>                                             | Ductus botalli, ARDS, bronchopulmonale Dysplasie, Acute Respiratory Distress Syndrome (ARDS), perinatale Asphyxie, IRDS, neonatale Pneumonie und respiratorische Anpassungsstörungen (respiratory distress in infants) inkl. Mekoniumaspiration | 21.1.4.32,<br>21.1.11.16 | 21.1.11.22,<br>21.1.11.26 | 21.1.11.27 |
| <b>P35-P39 Infektionen, die für die Perinatalperiode spezifisch sind</b>                                                                                    | intrauterine Infektionen, neonatale Sepsis                                                                                                                                                                                                      | 21.1.11.20               | 21.1.11.19                |            |
| <b>P50-P61 Hämorrhagische und hämatologische Krankheiten beim Feten und Neugeborenen</b>                                                                    | Vitamin-K-Mangelblutung                                                                                                                                                                                                                         | 21.1.11.28               |                           |            |
| P53 Hämorrhagische Krankheit beim Feten und Neugeborenen                                                                                                    | Fetomateriale Inkompatibilität (M. haemolyticus neonatorum, fetale, neonatale)                                                                                                                                                                  | 21.1.11.28               | 21.1.11.29                |            |
| P55 Hämolytische Krankheit beim Feten und Neugeborenen                                                                                                      |                                                                                                                                                                                                                                                 | 21.1.11.29               |                           |            |
| P57 Kernikterus                                                                                                                                             |                                                                                                                                                                                                                                                 | 16.3.26                  |                           |            |
| P59 Neugeborenenikterus durch sonstige und nicht näher bezeichnete Ursachen                                                                                 |                                                                                                                                                                                                                                                 | 16.3.26                  |                           |            |
| <b>P70-P74 Transitorische endokrine und Stoffwechselstörungen, die für den Feten und das Neugeborene spezifisch sind</b>                                    |                                                                                                                                                                                                                                                 |                          |                           |            |
| P70 Transitorische Störungen des Kohlenhydratstoffwechsels, die für den Feten und das Neugeborene spezifisch sind                                           |                                                                                                                                                                                                                                                 | x                        |                           |            |
| P74 Sonstige transitorische Störungen des Elektrolythaushaltes und des Stoffwechsels beim Neugeborenen                                                      |                                                                                                                                                                                                                                                 | x                        |                           |            |
| <b>P75-P78 Krankheiten des Verdauungssystems beim Feten und neugeborenen</b>                                                                                |                                                                                                                                                                                                                                                 |                          |                           |            |
| P75 Mekoniumileus                                                                                                                                           |                                                                                                                                                                                                                                                 | 21.1.11.32               |                           |            |
| P77 Enterocolitis necroticans beim Feten und Neugeborenen                                                                                                   | Nekrotisierende Enterokolitis bei Frühgeborenen                                                                                                                                                                                                 | 21.1.11.34               |                           |            |
| <b>P90-P96 Sonstige Störungen, die ihren Ursprung in der Perinatalperiode haben</b>                                                                         |                                                                                                                                                                                                                                                 |                          |                           |            |

|                                                                                            |                                                                                                                                                            |                        |                        |            |
|--------------------------------------------------------------------------------------------|------------------------------------------------------------------------------------------------------------------------------------------------------------|------------------------|------------------------|------------|
| P90 Krämpfe beim Neugeborenen                                                              | neonatale Hirnblutung, zerebrale Fehlbildungen                                                                                                             | 21.1.11.39             | 21.1.11.37             |            |
| P91 Sonstige zerebrale Störungen beim Neugeborenen                                         | Periventrikuläre Leukomalazie, Neonatale Hirnblutung                                                                                                       | 21.1.11.36, 21.1.11.37 | 21.1.11.38, 21.1.11.39 |            |
| P92 Ernährungsprobleme beim Neugeborenen                                                   |                                                                                                                                                            | x                      |                        |            |
| <b>Q00-Q07 Angeborene Fehlbildungen des Nervensystems</b>                                  |                                                                                                                                                            | 21.1.11.36             | 21.1.11.38             | 21.1.11.39 |
| Q05 Spina bifida                                                                           | Neuralrohrdefekte, Spina Bifida                                                                                                                            | 21.1.11.38             |                        |            |
| Q07 Sonstige angeborene Fehlbildungen des Nervensystems                                    | Neuralrohrdefekte, Spina Bifida, Hydrocephalus und zerebrale Fehlbildungen                                                                                 | 21.1.11.36             | 21.1.11.38             | 21.1.11.39 |
| <b>Q10-Q18 Angeborene Fehlbildungen des Auges, des Ohres, des Gesichtes und des Halses</b> |                                                                                                                                                            | 21.1.11.24             | 20.3                   |            |
| <b>Q20-Q28 Angeborene Fehlbildungen des Kreislaufsystems</b>                               | Kongenitale Herzfehler, Persistierender Ductus arteriosus des Frühgeborenen                                                                                | 21.1.11.21, 21.1.11.22 |                        |            |
| <b>Q30-Q34 Angeborene Fehlbildungen des Atmungssystems</b>                                 | Fehlbildungen des Respirationstraktes: Choanalatresie                                                                                                      | 21.1.11.25, 21.1.11.27 |                        |            |
| Q30 Angeborene Fehlbildungen der Nase                                                      |                                                                                                                                                            | 20.3                   | 21.1.11.25             |            |
| Q33 Angeborene Fehlbildungen der Lunge                                                     |                                                                                                                                                            | 21.1.11.25             | 21.1.11.27             |            |
| <b>Q35-Q37 Lippen-, Kiefer- und Gaumenspalte</b>                                           | Lippen-Kiefer-Gaumenspalte, Gesichtsfehlbildung                                                                                                            | 21.1.11.24             |                        |            |
| <b>Q38-Q45 Sonstige angeborene Fehlbildungen des Verdauungssystems</b>                     | Atresien und Fehlbildungen des Gastrointestinaltrakts bei Feten und Neugeborenen (Speiseröhren-, Darm-, Gallengangs-, Anal-Atresie; Volvulus, Malrotation) | 21.1.11.31             |                        |            |
| Q39 Angeborene Fehlbildungen des Ösophagus                                                 | Atresien und Fehlbildungen des Gastrointestinaltrakts bei Feten und Neugeborenen (Speiseröhren-, Darm-, Gallengangs-, Anal-Atresie; Volvulus, Malrotation) | 21.1.11.31             |                        |            |
| Q40 Sonstige angeborene Fehlbildungen des oberen Verdauungstraktes                         | Angeborene Pylorusstenose                                                                                                                                  | 21.1.11.31             | 21.1.7.34              |            |
| Q41 Angeborene(s) Fehlen, Atresie und Stenose des Dünndarmes                               | Atresien und Fehlbildungen des Gastrointestinaltrakts bei Feten und Neugeborenen (Speiseröhren-, Darm-, Gallengangs-, Anal-Atresie; Volvulus, Malrotation) | 21.1.11.31             |                        |            |
| Q43 Sonstige angeborene Fehlbildungen des Darmes                                           | Dünndarm- und Dickdarmdivertikel inkl. Komplikationen, Malrotation, Volvulus, Kongenitales Megakolon                                                       | 21.1.7.17              | 21.1.11.31             | 21.1.11.33 |
| Q44 Angeborene Fehlbildungen der Gallenblase, der Gallengänge und der Leber                | Atresien und Fehlbildungen des Gastrointestinaltrakts bei Feten und Neugeborenen (Speiseröhren-, Darm-, Gallengangs-, Anal-Atresie; Volvulus, Malrotation) | 21.1.11.31             |                        |            |
| <b>Q50-Q56 Angeborene Fehlbildungen der Genitalorgane</b>                                  |                                                                                                                                                            | 21.1.11.30             | 20.3                   |            |
| Q51 Angeborene Fehlbildungen des Uterus und der Cervix uteri                               |                                                                                                                                                            | 20.3                   |                        |            |
| Q52 Sonstige angeborene Fehlbildungen der weiblichen Genitalorgane                         |                                                                                                                                                            | 20.3                   |                        |            |
| Q53 Nondescensus testis                                                                    | Hodenhochstand                                                                                                                                             | 21.1.6.8               |                        |            |
| Q54 Hypospadie                                                                             |                                                                                                                                                            | 21.1.11.30             |                        |            |
| Q55 Sonstige angeborene Fehlbildungen der männlichen Genitalorgane                         |                                                                                                                                                            | 21.1.6.8, 21.1.6.10    | 21.1.6.11, 21.1.11.30  |            |
| <b>Q60-Q64 Angeborene Fehlbildungen des Harnsystems</b>                                    | Zystische Nierenkrankheit, Renale und urogenitale Fehlbildung (z.B. Hufeisenniere, Hypospadie, Blasenektrophie, Harnröhrenklappen, Hymenalatresie)         | 21.1.6.16              | 21.1.11.30             |            |
| <b>Q65-Q79 Angeborene Fehlbildungen und Deformitäten des Muskel-Skelett-Systems</b>        |                                                                                                                                                            |                        |                        |            |
| Q65 Angeborene Deformitäten der Hüfte                                                      | Hüftgelenksdysplasie                                                                                                                                       | 21.1.2.36              |                        |            |
| Q66 Angeborene Deformitäten der Füße                                                       | Angeborene Fußdeformitäten, z.B. Klumpfuß, Sichelfuß                                                                                                       | 21.1.11.23             |                        |            |

|                                                                                                        |                                                                                                                                   |                      |                      |            |
|--------------------------------------------------------------------------------------------------------|-----------------------------------------------------------------------------------------------------------------------------------|----------------------|----------------------|------------|
| Q67 Angeborene Muskel-Skelett-Deformitäten des Kopfes, des Gesichtes, der Wirbelsäule und des Thorax   | Skoliosen und sonstige Wirbelsäulendeformitäten                                                                                   | 21.1.2.13            | 21.1.11.24           |            |
| Q71 Reduktionsdefekte der oberen Extremität                                                            |                                                                                                                                   | x                    |                      |            |
| Q72 Reduktionsdefekte der unteren Extremität                                                           |                                                                                                                                   | x                    |                      |            |
| Q73 Reduktionsdefekte nicht näher bezeichneter Extremität(en)                                          |                                                                                                                                   | x                    |                      |            |
| Q75 Sonstige angeborene Fehlbildungen der Schädel- und Gesichtsschädelknochen                          | Achondroplasie, Osteogenesis imperfecta, Kraniosynostose                                                                          | 20.3                 | 21.1.2.46            | 21.1.11.24 |
| Q76 Angeborene Fehlbildungen der Wirbelsäule und des knöchernen Thorax                                 |                                                                                                                                   | 21.1.2.13            |                      |            |
| Q78 Sonstige Osteochondrodysplasien                                                                    | Achondroplasie, Osteogenesis imperfecta, Kraniosynostose                                                                          | 21.1.2.11            | 21.1.2.46            |            |
| Q79 Angeborene Fehlbildungen des Muskel-Skelett-Systems, anderenorts nicht klassifiziert               | Kongenitale Hernien und Defekte von Zwerchfell und Bauchwand, Osteogenesis imperfecta                                             | 21.1.2.33            | 21.1.2.37            |            |
| <b>Q80-Q89 Sonstige angeborene Fehlbildungen</b>                                                       |                                                                                                                                   |                      |                      |            |
| Q80 Ichthyosis congenita                                                                               |                                                                                                                                   | x                    |                      |            |
| Q82 Sonstige angeborene Fehlbildungen der Haut                                                         |                                                                                                                                   | x                    |                      |            |
| Q85 Phakomatosen, anderenorts nicht klassifiziert                                                      | Neurofibromatose                                                                                                                  | 21.1.10.38           |                      |            |
| Q86 Angeborene Fehlbildungssyndrome durch bekannte äußere Ursachen, anderenorts nicht klassifiziert    | Fehlbildungen, Folgen von Substanzabusus (z.B. Nikotin, Alkohol) und von Gewalterfahrung und -erleben in der Schwangerschaft      | 20.3                 | 21.1.11.7            |            |
| Q87 Sonstige näher bezeichnete angeborene Fehlbildungssyndrome mit Beteiligung mehrerer Systeme        | Fehlbildungen, Marfan-Syndrom                                                                                                     | 20.3                 | 21.1.2.5             |            |
| <b>Q90-Q99 Chromosomenanomalien, anderenorts nicht klassifiziert</b>                                   | Chromosomenanomalien (Trisomien, Klinefelter-Syndrom, Turner-Syndrom)                                                             | 21.1.11.21           |                      |            |
| <b>R10-R19 Symptome, die das Verdauungssystem und das Abdomen betreffen</b>                            |                                                                                                                                   |                      |                      |            |
| R10 Bauch- und Beckenschmerzen                                                                         |                                                                                                                                   | 20.15                |                      |            |
| R11 Übelkeit und Erbrechen                                                                             |                                                                                                                                   | 20.110               |                      |            |
| <b>R50-R69 Allgemeinsymptome</b>                                                                       |                                                                                                                                   | 20.63                |                      |            |
| R55 Synkope und Kollaps                                                                                |                                                                                                                                   | 21.1.1.16            |                      |            |
| R56 Krämpfe, anderenorts nicht klassifiziert                                                           | Crampi, Muskelkrämpfe                                                                                                             | 20.58                | 21.1.10.19           | 21.1.10.20 |
| R64 Kachexie                                                                                           | Unterernährung (Kachexie, Anorexie, Sarkopenie)                                                                                   | 20.111               | 21.1.3.38            |            |
| <b>R95-R99 Ungenau bezeichnete und unbekannte Todesursachen</b>                                        |                                                                                                                                   |                      |                      |            |
| R95 Plötzlicher Kindstod                                                                               |                                                                                                                                   | 21.1.4.25            |                      |            |
| <b>S00-S09 Verletzungen des Kopfes</b>                                                                 | Weichgewebsverletzung des Gesichtes, Schädelfrakturen, Schädel-Hirn-Trauma                                                        | 20.88, 21.1.2.6      | 21.1.2.45            | 21.1.10.2  |
| <b>S10-S19 Verletzungen des Halses</b>                                                                 |                                                                                                                                   | x                    |                      |            |
| <b>S20-S29 Verletzungen des Thorax</b>                                                                 | Thoraxtrauma                                                                                                                      | 21.1.4.1             |                      |            |
| <b>S30-S39 Verletzungen des Abdomens, der Lumbosakralgegend, der Lendenwirbelsäule und des Beckens</b> | Beckentrauma und begleitende Organverletzungen, Verletzung parenchymatöser abdomineller Organe, z.B. Milz, Leber, Pankreas, Niere | 21.1.2.1             | 21.1.7.8             |            |
| <b>S40-S49 Verletzungen der Schulter und des Oberarmes</b>                                             | Claviculafraktur, Verletzung des AC-Gelenks, Humerusfrakturen                                                                     | 21.1.2.15, 21.1.2.16 | 21.1.2.17, 21.1.2.18 | 21.1.2.21  |
| <b>S50-S59 Verletzungen des Ellenbogens und des Unterarmes</b>                                         | Distale Radiusfraktur und andere Verletzungen des Unterarms                                                                       | 21.1.2.23            | 21.1.2.18            | 21.1.2.19  |
| <b>S60-S69 Verletzungen des Handgelenkes und der Hand</b>                                              | Frakturen und Bandverletzungen der Hand und des Handgelenks, Erkrankungen des Nagels, Fingerkuppenverletzung                      | 21.1.2.24            | 21.1.8.8             |            |
| <b>S70-S79 Verletzungen der Hüfte und des Oberschenkels</b>                                            | Femurfrakturen                                                                                                                    | 21.1.2.1             | 21.1.2.20            |            |
| <b>S80-S89 Verletzungen des Knies und des Unterschenkels</b>                                           | Frakturen und Bandverletzungen der Hand und des Handgelenks                                                                       | 21.1.2.22            | 21.1.2.23            | 21.1.2.32  |
| <b>S90-S99 Verletzungen der Knöchelregion und des Fußes</b>                                            |                                                                                                                                   | 21.1.2.23            |                      |            |
| <b>T00-T07 Verletzungen mit Beteiligung mehrerer Körperregionen</b>                                    |                                                                                                                                   | x                    |                      |            |



|                                                                                                                                                     |                                                                     |                     |                      |          |
|-----------------------------------------------------------------------------------------------------------------------------------------------------|---------------------------------------------------------------------|---------------------|----------------------|----------|
| <b>T08-T14 Verletzungen nicht näher bezeichneter Teile des Rumpfes, der Extremitäten oder anderer Körperregionen</b>                                | Verletzungen der Wirbelsäule, Wirbelfrakturen, Thoraxtrauma         | 21.1.2.14, 21.1.4.1 |                      |          |
| <b>T15-T19 Folgen des Eindringens eines Fremdkörpers durch eine natürliche Körperöffnung</b>                                                        | Fremdkörperaspiration und -ingestion                                | 21.1.4.2            | 21.1.9.15            |          |
| <b>T20-T32 Verbrennungen oder Verätzungen</b>                                                                                                       | Verbrennung, Verbrühung, Unterkühlung, Erfrierung                   | 20.114              | 21.1.8.1             |          |
| <b>133-135 Erfrierungen</b>                                                                                                                         | Verbrennung, Verbrühung, Unterkühlung, Erfrierung                   | 21.1.8.1            |                      |          |
| <b>T36-T50 Vergiftungen durch Arzneimittel, Drogen und biologisch aktive Substanzen</b>                                                             | Intoxikation                                                        | 21.1.10.65          | 20.51                |          |
| <b>T51-T65 Toxische Wirkungen von vorwiegend nicht medizinisch verwendeten Substanzen</b>                                                           | Intoxikationen durch Alkohol, Drogen, Medikamente und andere Toxine | 21.1.10.65          | 20.51                |          |
| <b>T66-T78 Sonstige und nicht näher bezeichnete Schäden durch äußere Ursachen</b>                                                                   |                                                                     | x                   |                      |          |
| T67 Schäden durch Hitze und Sonnenlicht                                                                                                             |                                                                     | x                   |                      |          |
| T68 Hypothermie                                                                                                                                     | Unterkühlung                                                        | 21.1.8.1            |                      |          |
| T69 Sonstige Schäden durch niedrige Temperatur                                                                                                      | Erfrierung                                                          | 21.1.8.1            |                      |          |
| T71 Erstickung                                                                                                                                      |                                                                     | x                   |                      |          |
| T74 Missbrauch von Personen                                                                                                                         | Misshandlung, Kindesmissbrauch, Sexueller Missbrauch                | 20.41, 20.54        | 21.1.2.35, 21.1.6.32 |          |
| T75 Schäden durch sonstige äußere Ursachen                                                                                                          |                                                                     | x                   |                      |          |
| T78 Unerwünschte Nebenwirkungen, anderenorts nicht klassifiziert                                                                                    | Maligne Hyperthermie                                                | 20.51               | 20.59                | 21.1.2.8 |
| T79 Bestimmte Frühkomplikationen eines Traumas, anderenorts nicht klassifiziert                                                                     | Kompartmentsyndrom der Extremitäten                                 | 21.1.2.4            |                      |          |
| <b>T80-T88 Komplikationen bei chirurgischen Eingriffen und medizinischer Behandlung, anderenorts nicht klassifiziert</b>                            |                                                                     | x                   |                      |          |
| <b>U00-U49 Vorläufige Zuordnungen für Krankheiten mit unklarer Ätiologie</b>                                                                        |                                                                     | x                   |                      |          |
| U04 Schweres akutes respiratorisches Syndrom [SARS]                                                                                                 |                                                                     | x                   |                      |          |
| <b>U80-U85 Infektionserreger mit Resistenzen gegen bestimmte Antibiotika oder Chemotherapeutika</b>                                                 |                                                                     | x                   |                      |          |
| U80 Erreger mit bestimmten Antibiotikaresistenzen, die besondere therapeutische oder hygienische Maßnahmen erfordern                                |                                                                     | x                   |                      |          |
| U82 Mykobakterien mit Resistenz gegen Antituberkulotika (Erststrangmedikamente)                                                                     |                                                                     | x                   |                      |          |
| <b>V01-X59 Unfälle</b>                                                                                                                              |                                                                     | x                   |                      |          |
| <b>X60-X84 Vorsätzliche Selbstbeschädigung</b>                                                                                                      |                                                                     | 20.71               |                      |          |
| <b>X85-Y09 Tätlicher Angriff</b>                                                                                                                    |                                                                     | 20.71               |                      |          |
| <b>Z00-Z013 Personen, die das Gesundheitswesen zur Untersuchung und Abklärung in Anspruch nehmen</b>                                                |                                                                     |                     |                      |          |
| Z00 Allgemeinuntersuchung und Abklärung bei Personen ohne Beschwerden oder angegebene Diagnose                                                      |                                                                     | 20.85               | 21.1.10.56           |          |
| Z08 Nachuntersuchung nach Behandlung wegen bösartiger Neubildung                                                                                    |                                                                     | 20.76               |                      |          |
| Z09 Nachuntersuchung nach Behandlung wegen anderer Krankheitszustände außer bösartigen Neubildungen                                                 |                                                                     | 20.76               |                      |          |
| <b>Z30-Z39 Personen, die das Gesundheitswesen im Zusammenhang mit Problemen der Reproduktion in Anspruch nehmen</b>                                 |                                                                     | x                   |                      |          |
| Z30 Kontrazeptive Maßnahmen                                                                                                                         |                                                                     | x                   |                      |          |
| <b>Z70-Z76 Personen, die das Gesundheitswesen aus sonstigen Gründen in Anspruch nehmen</b>                                                          |                                                                     | x                   |                      |          |
| Z71 Personen, die das Gesundheitswesen zum Zwecke anderer Beratung oder ärztlicher Konsultation in Anspruch nehmen, anderenorts nicht klassifiziert |                                                                     | x                   |                      |          |

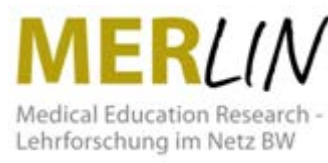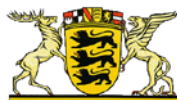

Universität Tübingen

Kompetenzzentrum für Hochschuldidaktik in Medizin Baden-Württemberg  
Medizinische Fakultät  
Elfriede-Aulhorn-Straße 10 · 72076 Tübingen  
Telefon +49 7071 29-77974 · Fax +49 7071 29-5218  
[www.medicin-bw.de](http://www.medicin-bw.de)  
[www.medidaktik.de](http://www.medidaktik.de)
